# Supplementary material for: Palladium-catalyzed intramolecular asymmetric hydrocyclopropanylation of alkynes: synthesis of cyclopropane-fused γ-lactams
Source: Royal Society of Chemistry journal article supplement (doi:10.1039/d3sc02168h), 2023-01-01
Supplement: d3sc02168h1.pdf [file d3sc02168h1.pdf]

## Supporting Information

# Palladium-Catalyzed Intramolecular Asymmetric Hydrocyclopropanylation of Alkynes: Synthesis of Cyclopropane-Fused $\gamma$ -Lactams

Han-Ze Lin,<sup>†,#</sup> Zhuang Qi,<sup>†,#</sup> Qi-Min Wu,<sup>†</sup> Yong-Yu Jiang<sup>†</sup> and Jin-Bao Peng<sup>\*,†</sup>

<sup>†</sup>School of Biotechnology and Health Sciences, Wuyi University, Jiangmen, Guangdong 529020, P. R. China; orcid.org/0000-0002-0568-7740; E-mail: pengjb\_05@126.com

## Table of Contents

|                                                                    |           |
|--------------------------------------------------------------------|-----------|
| <b>Supporting Information .....</b>                                | <b>1</b>  |
| <b>1. General Information.....</b>                                 | <b>3</b>  |
| <b>2 Preparation of the Compounds 1a-1r .....</b>                  | <b>4</b>  |
| <b>3 Optimization of Reaction Conditions.....</b>                  | <b>6</b>  |
| <b>4 General Procedure.....</b>                                    | <b>11</b> |
| <b>5 Experimental Characterization Data for the Starting .....</b> | <b>12</b> |
| <b>6 X-ray Crystal Structure Determination of the Products ..</b>  | <b>25</b> |
| <b>7 References.....</b>                                           | <b>27</b> |
| <b>8 Copies of NMR Spectra for Compounds .....</b>                 | <b>28</b> |

# 1. General Information

## Reagents, solvents and analytical methods:

Unless otherwise noted, all reactions were carried out under a nitrogen atmosphere. All reagents were from commercial sources and used as received without further purification. All solvents were dried by standard techniques and distilled prior to use. Column chromatography was performed on silica gel (200-300 meshes) using petroleum ether (bp. 60~90 °C) and ethyl acetate as eluent. <sup>1</sup>H NMR spectra were recorded on a Bruker Avance operating at for <sup>1</sup>H NMR at 500 MHz, <sup>13</sup>C NMR at 126 MHz and <sup>19</sup>F NMR at 471 MHz and spectral data were reported in ppm relative to tetramethylsilane (TMS) as internal standard and CDCl<sub>3</sub> (<sup>1</sup>H NMR δ 7.27, <sup>13</sup>C NMR δ 77.0) as solvent. High-resolution mass spectra (HRMS) is produced by Thermo Fisher Scientific. Its main body is composed of two parts: Thermo Scientific's UltiMate 3000 Series liquid system and Thermo Scientific Q-Exactive combined quadrupole Orbitrap mass spectrometer. All coupling constants (*J*) are reported in Hz. The following abbreviations were used to describe peak splitting patterns when appropriate: s = singlet, d = doublet, dd = double doublet, ddd = double doublet of doublets, t = triplet, dt = double triplet, q = quatrimplet, m = multiplet, br = broad. Compounds **1a-1r** were prepared according to the previous literatures.<sup>[1, 2, 3, 4]</sup>

## 2 Preparation of the Compounds 1a-1r

Compounds **1a-1r** were prepared according to the previous literature.

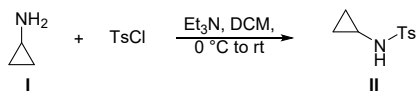

Following a modified version of a reported procedure,<sup>[1]</sup> to a solution of acyl chloride (12 mmol, 1.2 equiv.) in dichloromethane (10 mL). Then, triethylamine (1.40 mL, 10.0 mmol, 1.1 equiv.) was added slowly. Then a solution of cyclopropylamine (0.70 mL, 10 mmol, 1.0 equiv.) in dichloromethane (10 mL) was added slowly at 0 °C. The reaction mixture was stirred at room temperature usually for 16 hours. Upon completion, the aqueous layer was then extracted with dichloromethane. The organic extract was dried over Na<sub>2</sub>SO<sub>4</sub>, filtered and concentrated in vacuo. the residue was purified by a flash column chromatograph on silica gel using petroleum ether / ethyl acetate as the eluent to yield the products **II**.

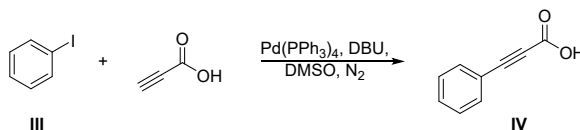

Following a modified version of a reported procedure,<sup>[2]</sup> A small round bottomed flask was charged with aryl iodide (5.0 mmol), DBU (1.67 g, 2.2 equiv., 12 mmol), Pd(PPh<sub>3</sub>)<sub>4</sub> (173 mg, 3 mol%) and DMSO (6 mL). The solution of propiolic acid (420 mg, 1.2 equiv., 6.0 mmol) in DMSO (6 mL) was poured to the flask. The mixture was stirred at ambient temperature for 12 h. Upon completion of the reaction, the reaction mixture was diluted with ethyl acetate (20 mL), then extracted with NaHCO<sub>3</sub> (sat. aq). The aqueous layer was separated, acidified to pH 1.0 by adding HCl (1 N), and extracted with ethyl acetate. The combined organic layers were dried with Na<sub>2</sub>SO<sub>4</sub>, and the solvent was removed under reduced pressure. The resulting crude product was purified by flash chromatography (on silica, ethyl acetate: petroleum ether = 4:1) gave the corresponding aryl alkynyl carboxylic acids **IV**.

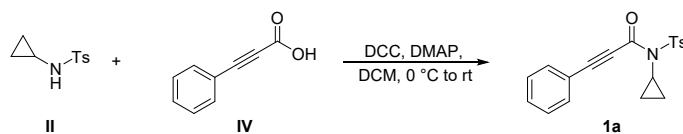

Following a modified version of a reported procedure,<sup>[3]</sup> dichloromethane (20 mL) and phenylpropynoic acid (11 mmol) were added into a 50 mL round bottom glass flask, and then *N*-alkylaniline (10 mmol) was added at 0 °C. Thereafter, a solution of DCC (15 mmol), DMAP (0.5 mmol) and dichloromethane (20 mL) was slowly added dropwise with stirring. The mixture was washed with 5 mL saturated Na<sub>2</sub>CO<sub>3</sub> solution, 5 mL saturated NaCl solution, and 5 mL water. The organic phase was dried over Na<sub>2</sub>SO<sub>4</sub>, filtered and concentrated. The residue was purified by column chromatography on silica gel (petroleum ether/ethyl acetate as the eluent) affording the corresponding *N*-cyclopropyl-3-phenyl-*N*-tosylpropiolamide **1a**.

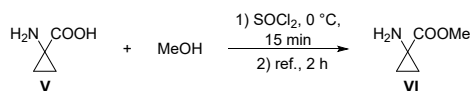

Following a modified version of a reported procedure,<sup>[4]</sup> Add ethanol (2 mL) to a round-bottom flask. Cool the reaction mixture to 0 °C. Add thionyl chloride (706 mg, 430 μL) dropwise to the reaction mixture. Stir the reaction mixture for 15 minutes. Add 1-aminocyclopropanecarboxylic acid (300 mg) to the reaction mixture. Reflux the reaction mixture for 2 hours. Remove the solvent and affording the corresponding product **VI**.

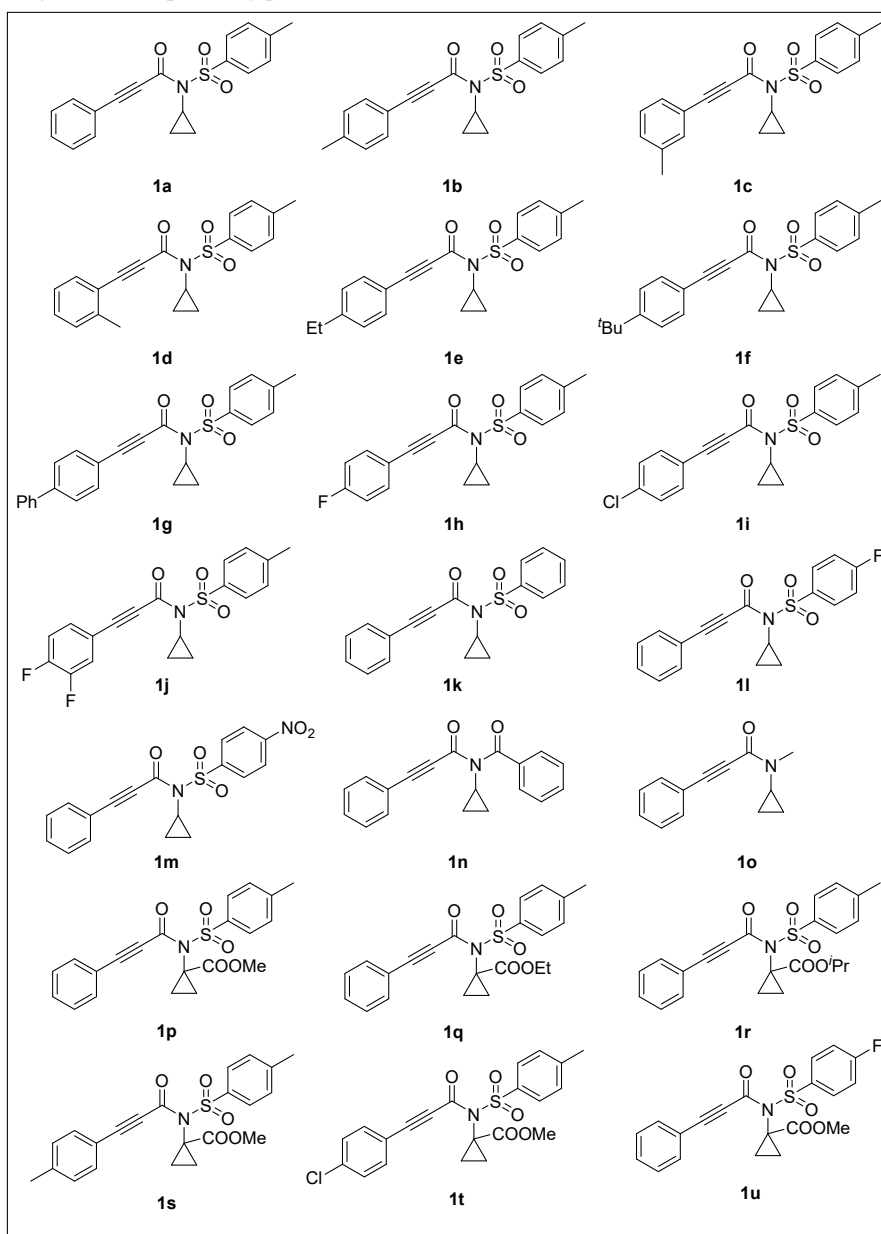

**Figure S1** Substrates of *N*-cyclopropyl-3-phenyl-*N*-tosylpropiolamide derivatives

### 3 Optimization of Reaction Conditions

**Table S1. Optimization of the Catalyst.**

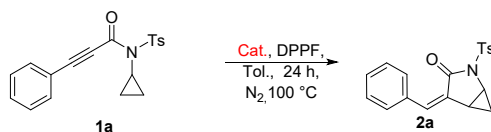

| Entry | Catalyst                           | Yield (%) <sup>[b]</sup> |
|-------|------------------------------------|--------------------------|
| 1     | PdCl <sub>2</sub>                  | NR                       |
| 2     | Pd(acac) <sub>2</sub>              | 17                       |
| 3     | Pd(OAc) <sub>2</sub>               | 52                       |
| 4     | Pd <sub>2</sub> (dba) <sub>3</sub> | 23                       |
| 5     | Pd(PPh <sub>3</sub> ) <sub>4</sub> | trace                    |
| 6     | Pd/C                               | NR                       |

[a] Reaction conditions: **1a** (0.2 mmol), Catalyst (5 mol%), DPPF (5 mol%), toluene (2 mL), N<sub>2</sub> atmosphere. [b] Isolated yield.

**Table S2. Optimization of the Ligand.<sup>[a]</sup>**

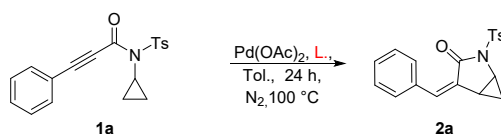

| Entry | Ligand             | Yield (%) <sup>[b]</sup> |
|-------|--------------------|--------------------------|
| 1     | PPh <sub>3</sub>   | 35                       |
| 2     | PCy <sub>3</sub>   | 90                       |
| 3     | BuPAD <sub>2</sub> | 96                       |
| 4     | dppp               | 95                       |
| 5     | DPEphos            | 27                       |
| 6     | Xantphos           | trace                    |

[a] Reaction conditions: **1a** (0.2 mmol), Pd(OAc)<sub>2</sub> (5 mol%), Ligand (10 mol% for monodentate ligand, 5 mol% for bidentate ligand), toluene (2 mL), N<sub>2</sub> atmosphere. [b] Isolated yield.

**Table S3. Optimization of the Solvent.<sup>[a]</sup>**

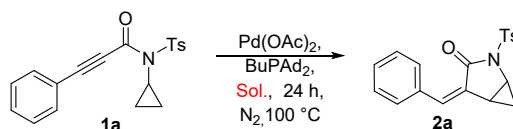

| Entry | Solvent | Yield (%) <sup>[b]</sup> |
|-------|---------|--------------------------|
| 1     | toluene | 96                       |
| 2     | THF     | 85                       |
| 3     | Dioxane | 88                       |
| 4     | DCM     | 27                       |

|   |      |       |
|---|------|-------|
| 5 | MeCN | trace |
| 6 | DMSO | 36    |
| 7 | DMF  | 44    |

[a] Reaction conditions: **1a** (0.2 mmol), Pd(OAc)<sub>2</sub> (5 mol%), Ligand (10 mol%), solvent (2 mL), N<sub>2</sub> atmosphere. [b] Isolated yield.

**Table S4. Optimization of the Ligand.**<sup>[a]</sup>

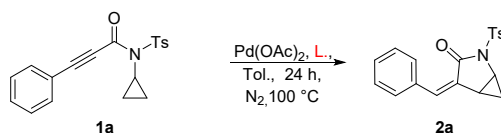

| Entry | Ligand             | Yield (%) <sup>[b]</sup> |
|-------|--------------------|--------------------------|
| 1     | PPh <sub>3</sub>   | 35                       |
| 2     | PCy <sub>3</sub>   | 90                       |
| 3     | BuPAd <sub>2</sub> | 96                       |
| 4     | dppp               | 95                       |
| 5     | DPEphos            | 27                       |
| 6     | Xantphos           | trace                    |

[a] Reaction conditions: **1a** (0.2 mmol), Pd(OAc)<sub>2</sub> (5 mol%), Ligand (10 mol% for monodentate ligand, 5 mol% for bidentate ligand), toluene (2 mL), N<sub>2</sub> atmosphere. [b] Isolated yield.

**Table S5. Optimization of the ratio of chiral Ligand and Catalyst.**<sup>[a]</sup>

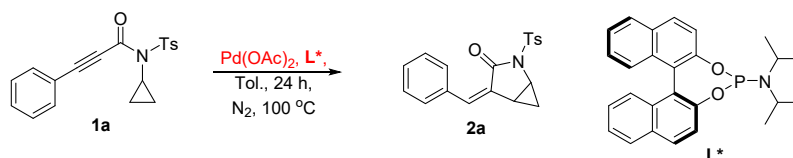

| Entry | Cat. and L. | Yield (%) <sup>[b]</sup> | ee (%) <sup>[c]</sup> |
|-------|-------------|--------------------------|-----------------------|
| 1     | 2%+4%       | 56                       | 67                    |
| 2     | 2%+5%       | NR                       | -                     |
| 3     | 3%+6%       | 43                       | 69                    |
| 4     | 5%+10%      | 59                       | 67                    |
| 5     | 5%+12%      | 60                       | 65                    |

[a] Reaction conditions: **1a** (0.2 mmol), Pd(OAc)<sub>2</sub> (5 mol%), Ligand (10 mol%), toluene (2 mL), N<sub>2</sub> atmosphere. [b] Isolated yield. [c] Determined by HPLC analysis on a chiral stationary phase.

**Table S6. Optimization of the Catalyst.**<sup>[a]</sup>

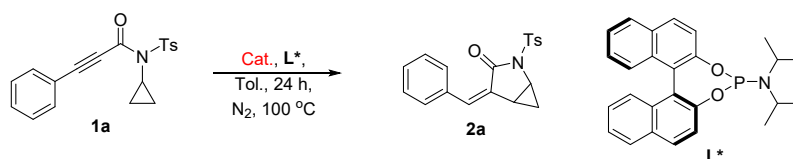

| Entry | Catalyst             | Yield (%) <sup>[b]</sup> | ee (%) <sup>[c]</sup> |
|-------|----------------------|--------------------------|-----------------------|
| 1     | Pd(OAc) <sub>2</sub> | 35                       | 67                    |

|   |                                       |    |    |
|---|---------------------------------------|----|----|
| 2 | PdCl <sub>2</sub>                     | NR | -  |
| 3 | Pd(acac) <sub>2</sub>                 | 50 | 67 |
| 4 | Pd <sub>2</sub> (dba) <sub>3</sub>    | 23 | 57 |
| 5 | Pd(PPh <sub>3</sub> ) <sub>4</sub>    | NR | -  |
| 6 | Pd/C                                  | NR | -  |
| 7 | PdBr <sub>2</sub>                     | NR | -  |
| 8 | Pd(TFA) <sub>2</sub>                  | NR | -  |
| 9 | Pd(MeCN) <sub>2</sub> Cl <sub>2</sub> | NR | -  |

[a] Reaction conditions: **1a** (0.2 mmol), Pd(OAc)<sub>2</sub> (5 mol%), Ligand (10 mol%), toluene (2 mL), N<sub>2</sub> atmosphere. [b] Isolated yield. [c] Determined by HPLC analysis on a chiral stationary phase.

**Table S7. Optimization of Temperature.**<sup>[a]</sup>

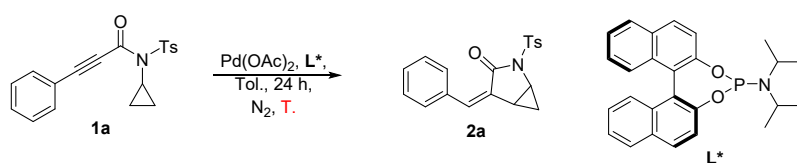

| Entry | Temp. | Yield (%) <sup>[b]</sup> | ee (%) <sup>[c]</sup> |
|-------|-------|--------------------------|-----------------------|
| 1     | 30    | NR                       | -                     |
| 2     | 60    | 17                       | 60                    |
| 3     | 80    | 35                       | 59                    |
| 4     | 100   | 47                       | 63                    |
| 5     | 120   | 49                       | 68                    |

[a] Reaction conditions: **1a** (0.2 mmol), Pd(OAc)<sub>2</sub> (5 mol%), Ligand (10 mol%), toluene (2 mL), N<sub>2</sub> atmosphere. [b] Isolated yield. [c] Determined by HPLC analysis on a chiral stationary phase.

**Table S8. Optimization of the Solvent.**<sup>[a]</sup>

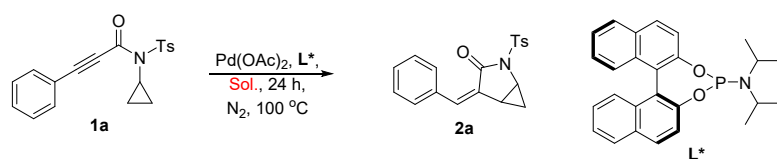

| Entry | Solvent  | Yield (%) <sup>[b]</sup> | ee (%) <sup>[c]</sup> |
|-------|----------|--------------------------|-----------------------|
| 1     | toluene  | 45                       | 63                    |
| 2     | THF      | NR                       | -                     |
| 3     | MeCN     | NR                       | -                     |
| 4     | dioxane  | NR                       | -                     |
| 5     | DCM      | NR                       | -                     |
| 6     | DMF      | NR                       | -                     |
| 7     | DMSO     | NR                       | -                     |
| 8     | o-xylene | NR                       | -                     |
| 9     | m-Xylene | 55                       | 63                    |
| 10    | p-Xylene | 33                       | 63                    |



|    |                          |       |    |
|----|--------------------------|-------|----|
| 11 | Chlorobenzene            | 35    | 70 |
| 12 | Bromobenzene             | trace | -  |
| 13 | fluorobenzene            | 73    | 70 |
| 14 | (trifluoromethyl)benzene | 67    | 66 |

[a] Reaction conditions: 1a (0.2 mmol), Pd(OAc)<sub>2</sub> (5 mol%), Ligand (10 mol%), Solvent (2 mL), N<sub>2</sub> atmosphere. [b] Isolated yield. [c] Determined by HPLC analysis on a chiral stationary phase.

**Table S9. Optimization of additive.**

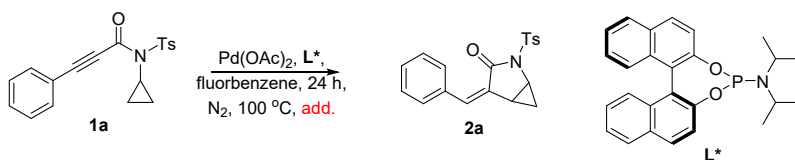

| Entry | Additive                       | Yield (%) <sup>[b]</sup> | ee (%) <sup>[c]</sup> |
|-------|--------------------------------|--------------------------|-----------------------|
| 1     | (R)-(+)-alpha                  | 45                       | 63                    |
| 2     | L(-)-Proline                   | 55                       | 70                    |
| 3     | N-Boc-L-Tert-Leucine           | 35                       | 57                    |
| 4     | N-Boc-L-valine                 | 37                       | 60                    |
| 5     | N-Ac-Phe-OH                    | 35                       | 63                    |
| 6     | L-Phenylalanine                | NR                       | -                     |
| 7     | Ag <sub>2</sub> O              | 51                       | 67                    |
| 8     | AgOTf                          | trace                    | -                     |
| 9     | 4Å MS                          | 59                       | 67                    |
| 10    | K <sub>2</sub> CO <sub>3</sub> | NR                       | 63                    |
| 11    | <sup>t</sup> BuOK              | 53                       | 69                    |
| 12    | 4-Chlorobenzenesulfonic acid   | NR                       | -                     |
| 14    | PTSA                           | NR                       | -                     |

[a] Reaction conditions: 1a (0.2 mmol), Pd(OAc)<sub>2</sub> (5 mol%), Ligand (10 mol%), Solvent (2 mL), additive (20 mol%) N<sub>2</sub> atmosphere. [b] Isolated yield. [c] Determined by HPLC analysis on a chiral stationary phase.

**Table S10. Optimization of the chiral Ligand.<sup>[a]</sup>**

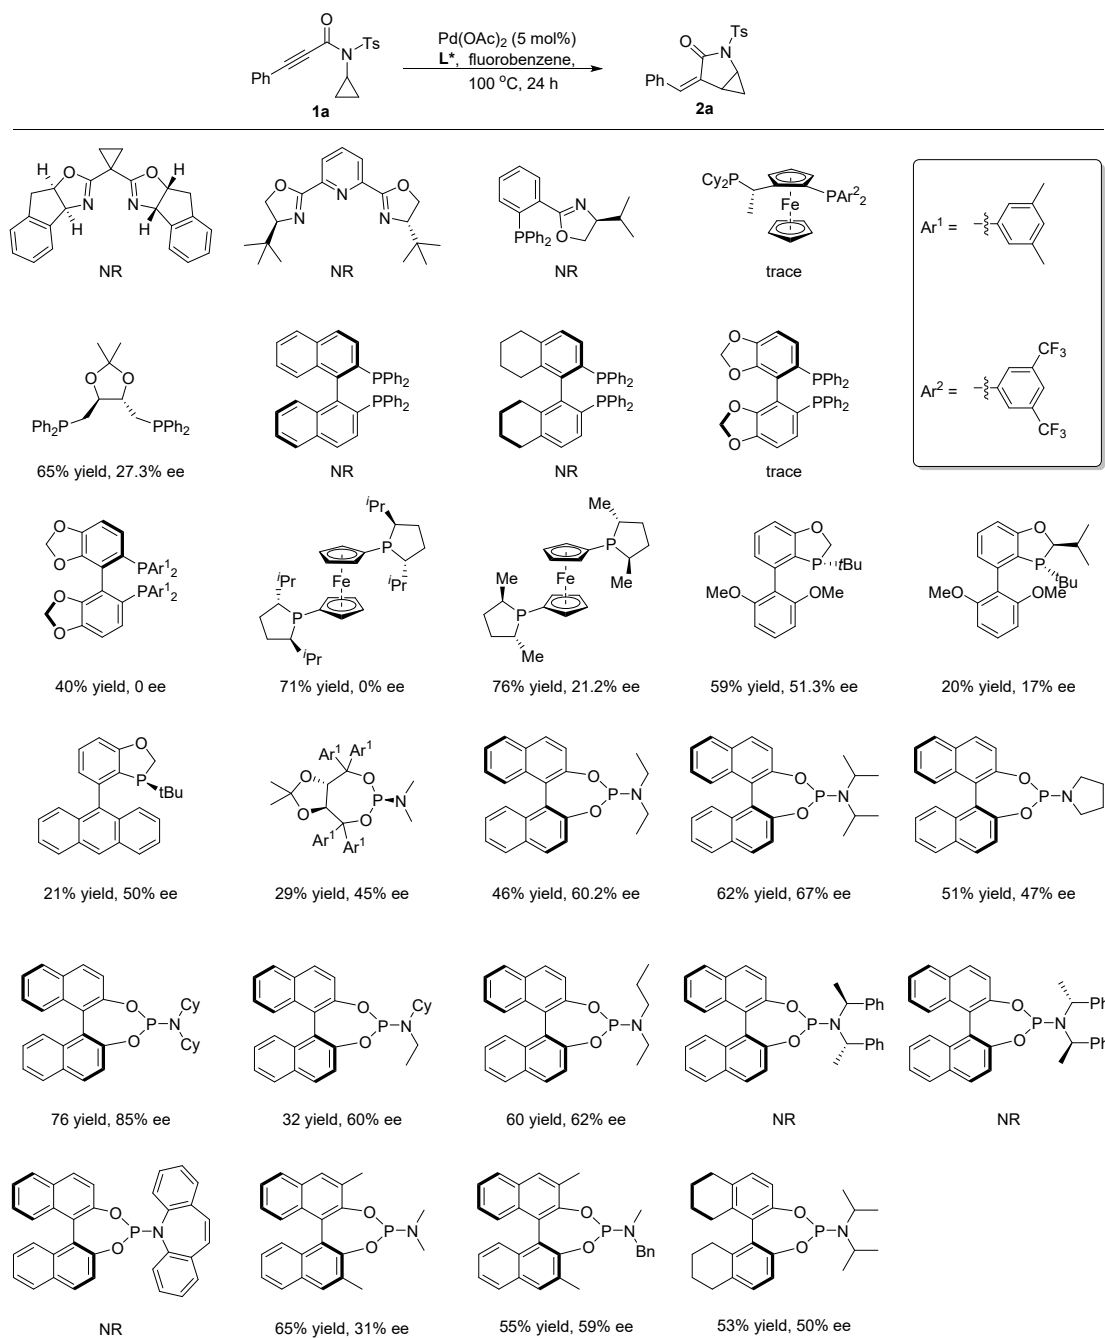

Reaction conditions: **1a** (0.2 mmol), Pd(OAc)<sub>2</sub> (5 mol%), Ligand (10 mol% for monodentate ligand, 5 mol% for bidentate ligand), fluorobenzene (2 mL), N<sub>2</sub> atmosphere.

**Table S11. Optimization of the chiral Ligand.<sup>[a]</sup>**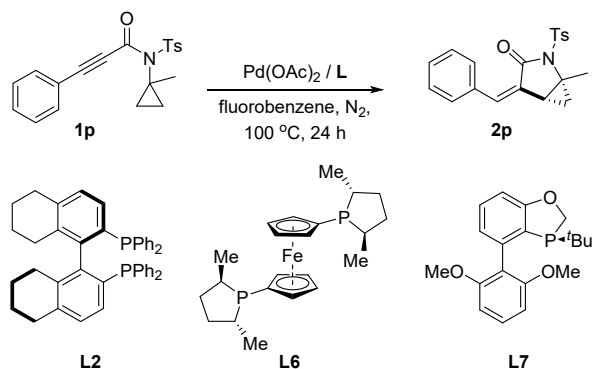

| Entry | L.        | Yield (%) <sup>[b]</sup> | ee (%) <sup>[c]</sup> |
|-------|-----------|--------------------------|-----------------------|
| 1     | <b>L2</b> | NR                       | -                     |
| 2     | <b>L6</b> | trace                    | -                     |
| 3     | <b>L7</b> | 61                       | 91                    |

[a] Reaction conditions: **1a** (0.2 mmol),  $\text{Pd}(\text{OAc})_2$  (5 mol%), Ligand (20 mol% for monodentate ligand, 10 mol% for bidentate ligand), Solvent (2 mL),  $\text{N}_2$  atmosphere. [b] Isolated yield. [c] Determined by HPLC analysis on a chiral stationary phase.

## 4 General Procedure

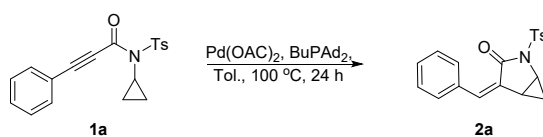

**1a** (67.8 mg, 0.2 mmol, 1 eq.),  $\text{Pd}(\text{OAc})_2$  (2.2 mg, 5 mol%),  $\text{BuPAD}_2$  (71.8 mg, 10 mol%), were transferred into a 15 mL tube. A 2.0 mL vial was placed in the tube and the tube was sealed with a septum. The tube was connected to an nitrogen-vacuum line, evacuated and backfilled with  $\text{N}_2$  (x3). Then, a solution of toluene (2 mL) was added to the reaction tube. Then, the reaction tube was sealed with a screw-top septum cap quickly and placed in a heating block that was preheated to  $100\text{ }^\circ\text{C}$ . After a time period of 24 h, the reaction tube was allowed cooled to room temperature. The mixture was concentrated under reduced pressure and the residue was purified by flash chromatography on silica gel eluting with petroleum ether / EtOAc to afford the products **2a**.

<sup>a</sup>For preparation of the asymmetric products, chiral ligand **L12** (or **L7**) was used with fluorobenzene as solvent.

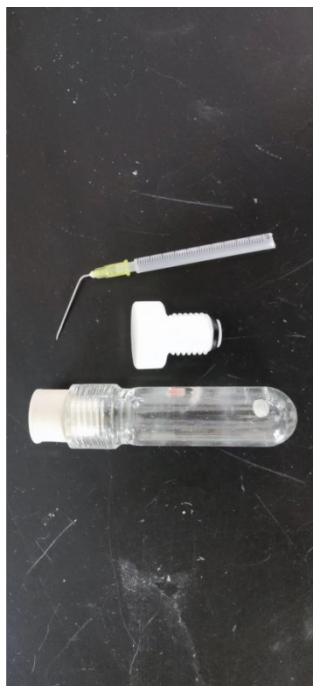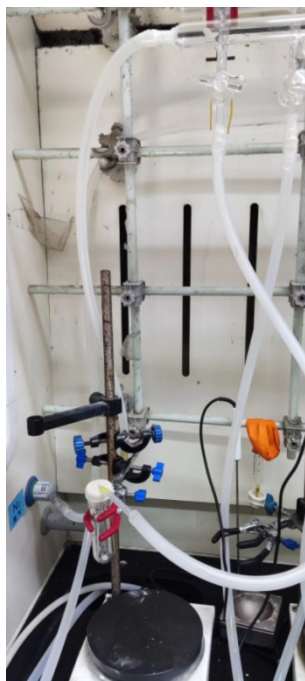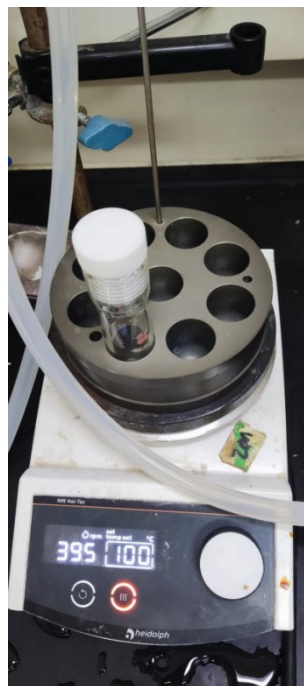

## 5 Experimental Characterization Data for the Starting

### Materials

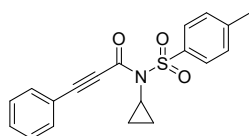

***N*-cyclopropyl-3-phenyl-*N*-tosylpropiolamide (1a).** The compound was prepared according to the general procedure to give a yellow solid.

**<sup>1</sup>H NMR (500 MHz, CDCl<sub>3</sub>)** δ 7.93 (d, *J* = 8.4 Hz, 2H), 7.53 (dd, *J* = 5.1, 3.3 Hz, 2H), 7.48 – 7.43 (m, 1H), 7.37 (dd, *J* = 10.5, 4.6 Hz, 2H), 7.32 (d, *J* = 8.2 Hz, 2H), 2.96 – 2.88 (m, 1H), 2.42 (s, 3H), 1.23 – 1.19 (m, 2H), 1.15 – 1.11 (m, 2H).

**<sup>13</sup>C NMR (126 MHz, CDCl<sub>3</sub>)** δ 154.7, 145.0, 136.0, 132.7, 130.9, 129.4, 128.6, 119.6, 93.6, 82.3, 28.6, 21.6, 10.3.

**HRMS (ESI) m/z:** [M+H]<sup>+</sup> Calcd for C<sub>19</sub>H<sub>18</sub>NO<sub>3</sub>S<sup>+</sup> 340.1002; Found 340.0997.

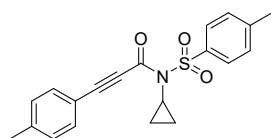

***N*-cyclopropyl-3-(*p*-tolyl)-*N*-tosylpropiolamide (1b).** The compound was prepared according to the general procedure to give a yellow solid.

**<sup>1</sup>H NMR (500 MHz, CDCl<sub>3</sub>)** δ 7.93 (d, *J* = 8.3 Hz, 2H), 7.43 (d, *J* = 8.1 Hz, 2H), 7.32 (d, *J* = 8.1 Hz, 2H), 7.18 (d, *J* = 8.0 Hz, 2H), 2.96 – 2.90 (m, 1H), 2.43 (s, 3H), 2.38 (s, 3H), 1.24 – 1.19 (m, 2H), 1.16 – 1.10 (m, 2H).

$^{13}\text{C}$  NMR (126 MHz,  $\text{CDCl}_3$ )  $\delta$  154.9, 145.1, 141.8, 136.2, 132.9, 129.6, 128.6, 116.6, 94.4, 82.2, 28.7, 21.8, 10.4.

HRMS (ESI)  $m/z$ :  $[\text{M}+\text{H}]^+$  Calcd for  $\text{C}_{20}\text{H}_{20}\text{NO}_3\text{S}^+$  354.1158; Found 354.1154.

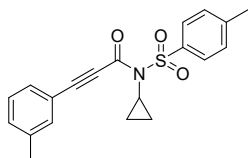

***N*-cyclopropyl-3-(*m*-tolyl)-*N*-tosylpropiolamide (1c).** The compound was prepared according to the general procedure to give a yellow solid.

$^1\text{H}$  NMR (500 MHz,  $\text{CDCl}_3$ )  $\delta$  7.93 (d,  $J = 8.3$  Hz, 2H), 7.35 – 7.33 (m, 4H), 7.32 – 7.27 (m, 2H), 2.95 – 2.91 (m, 1H), 2.44 (s, 3H), 2.35 (s, 3H), 1.25 – 1.21 (m, 2H), 1.16 – 1.12 (m, 2H).

$^{13}\text{C}$  NMR (126 MHz,  $\text{CDCl}_3$ )  $\delta$  154.9, 145.1, 138.7, 136.2, 133.3, 132.0, 130.0, 129.6, 128.7, 119.5, 94.1, 82.2, 28.7, 21.8, 21.3, 10.5.

HRMS (ESI)  $m/z$ :  $[\text{M}+\text{H}]^+$  Calcd for  $\text{C}_{20}\text{H}_{20}\text{NO}_3\text{S}^+$  354.1158; Found 354.1154.

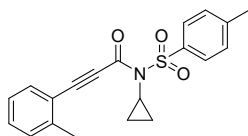

***N*-cyclopropyl-3-(*o*-tolyl)-*N*-tosylpropiolamide (1d).** The compound was prepared according to the general procedure to give a yellow solid.

$^1\text{H}$  NMR (500 MHz,  $\text{CDCl}_3$ )  $\delta$  7.94 (d,  $J = 8.4$  Hz, 2H), 7.50 (d,  $J = 7.7$  Hz, 1H), 7.38 – 7.31 (m, 3H), 7.25 (d,  $J = 7.7$  Hz, 1H), 7.20 (t,  $J = 7.6$  Hz, 1H), 2.98 – 2.92 (m, 1H), 2.47 (s, 3H), 2.44 (s, 3H), 1.25 – 1.19 (m, 2H), 1.16 – 1.10 (m, 2H).

$^{13}\text{C}$  NMR (126 MHz,  $\text{CDCl}_3$ )  $\delta$  156.0, 145.0, 140.7, 137.3, 136.2, 133.8, 130.5, 130.1, 129.5, 128.6, 116.8, 94.7, 82.1, 28.7, 21.7, 20.1, 19.6, 10.5.

HRMS (ESI)  $m/z$ :  $[\text{M}+\text{H}]^+$  Calcd for  $\text{C}_{20}\text{H}_{20}\text{NO}_3\text{S}^+$  354.1158; Found 354.1153.

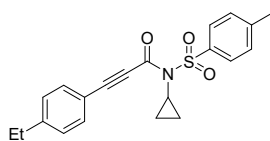

***N*-cyclopropyl-3-(4-ethylphenyl)-*N*-tosylpropiolamide (1e).** The compound was prepared according to the general procedure to give a yellow solid.

$^1\text{H}$  NMR (500 MHz,  $\text{CDCl}_3$ )  $\delta$  7.93 (d,  $J = 8.3$  Hz, 2H), 7.46 (d,  $J = 8.1$  Hz, 2H), 7.32 (d,  $J = 8.2$  Hz, 2H), 7.21 (d,  $J = 8.1$  Hz, 2H), 2.98 – 2.89 (m, 1H), 2.67 (q,  $J = 7.6$  Hz, 2H), 2.42 (s, 3H), 1.27 – 1.19 (m, 5H), 1.16 – 1.08 (m, 2H).

$^{13}\text{C}$  NMR (126 MHz,  $\text{CDCl}_3$ )  $\delta$  154.8, 147.9, 144.9, 136.1, 132.9, 129.4, 128.6, 128.2, 116.7, 94.3, 82.1, 29.0, 28.6, 21.6, 15., 10.3.

HRMS (ESI)  $m/z$ :  $[\text{M}+\text{H}]^+$  Calcd for  $\text{C}_{21}\text{H}_{22}\text{NO}_3\text{S}^+$  368.1315; Found 368.1310.

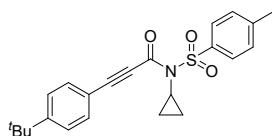

**3-(4-(tert-butyl)phenyl)-N-cyclopropyl-N-tosylpropiolamide (1h).** The compound was prepared according to the general procedure to give a yellow oil.

**<sup>1</sup>H NMR (500 MHz, CDCl<sub>3</sub>)** δ 7.97 (d, *J* = 8.3 Hz, 2H), 7.73 (d, *J* = 8.4 Hz, 2H), 7.35 (d, *J* = 8.5 Hz, 2H), 7.31 (d, *J* = 8.2 Hz, 2H), 6.95 (s, 1H), 4.00 (ddd, *J* = 7.3, 5.1, 2.4 Hz, 1H), 2.42 (s, 3H), 2.35 (td, *J* = 7.6, 4.7 Hz, 1H), 1.30 (s, 9H), 1.13 – 1.08 (m, 1H), 0.53 – 0.48 (m, 1H).

**<sup>13</sup>C NMR (126 MHz, CDCl<sub>3</sub>)** δ 163.9, 152.9, 145.0, 140.2, 135.2, 130.6, 129.6, 128.8, 128.3, 125.0, 34.8, 33.5, 31.1, 21.6, 17.5, 16.3.

**HRMS (ESI) m/z:** [M+H]<sup>+</sup> Calcd for C<sub>23</sub>H<sub>26</sub>NO<sub>3</sub>S<sup>+</sup> 396.1628; Found 396.1623.

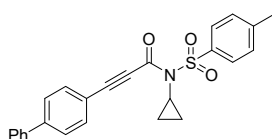

**3-([1,1'-biphenyl]-4-yl)-N-cyclopropyl-N-tosylpropiolamide (1i).** The compound was prepared according to the general procedure to give a white solid.

**<sup>1</sup>H NMR (500 MHz, CDCl<sub>3</sub>)** δ 7.95 (d, *J* = 8.3 Hz, 2H), 7.65 – 7.58 (m, 6H), 7.47 (t, *J* = 7.6 Hz, 2H), 7.40 (t, *J* = 7.3 Hz, 1H), 7.34 (d, *J* = 8.2 Hz, 2H), 2.95 (ddd, *J* = 10.5, 7.0, 3.7 Hz, 1H), 2.45 (s, 3H), 1.24 (dd, *J* = 10.8, 4.1 Hz, 2H), 1.16 (dd, *J* = 10.1, 7.4 Hz, 2H).

**<sup>13</sup>C NMR (126 MHz, CDCl<sub>3</sub>)** δ 154.7, 145.0, 143.9, 139.8, 136.2, 133.4, 129.6, 129.1, 128.7, 128.4, 127.5, 127.2, 118.4, 93.7, 83.3, 28.6, 21.6, 10.3.

**HRMS (ESI) m/z:** [M+H]<sup>+</sup> Calcd for C<sub>25</sub>H<sub>22</sub>NO<sub>3</sub>S<sup>+</sup> 416.1315; Found 416.1311.

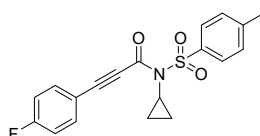

**N-cyclopropyl-3-(4-fluorophenyl)-N-tosylpropiolamide (1f).** The compound was prepared according to the general procedure to give a white solid.

**<sup>1</sup>H NMR (500 MHz, CDCl<sub>3</sub>)** δ 8.12 – 8.04 (m, 2H), 7.59 – 7.51 (m, 2H), 7.47 (dd, *J* = 10.7, 4.3 Hz, 1H), 7.38 (t, *J* = 7.6 Hz, 2H), 7.20 (t, *J* = 8.6 Hz, 2H), 3.00 – 2.88 (m, 1H), 1.29 – 1.21 (m, 5H), 1.18 – 1.12 (m, 2H).

**<sup>13</sup>C NMR (126 MHz, CDCl<sub>3</sub>)** δ 165.1, 163.1, 154.7, 145.2, 136.0, 135.2, 129.6, 128.6, 116.4, 116.3, 92.7, 82.3, 28.7, 21.7, 10.7.

**<sup>19</sup>F NMR (471 MHz, CDCl<sub>3</sub>)** δ -105.60 (s).

**HRMS (ESI) m/z:** [M+H]<sup>+</sup> Calcd for C<sub>19</sub>H<sub>17</sub>FNO<sub>2</sub>S<sup>+</sup> 358.0908; Found 358.0902.

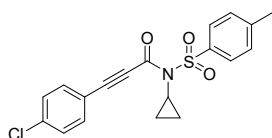

**3-(4-chlorophenyl)-*N*-cyclopropyl-*N*-tosylpropiolamide (1g).** The compound was prepared according to the general procedure to give a yellow solid.

**<sup>1</sup>H NMR (500 MHz, CDCl<sub>3</sub>)** δ 7.92 (d, *J* = 8.3 Hz, 2H), 7.47 (d, *J* = 8.4 Hz, 2H), 7.37 (d, *J* = 8.4 Hz, 2H), 7.33 (d, *J* = 8.2 Hz, 2H), 2.94 – 2.86 (m, 1H), 2.44 (s, 3H), 1.24 – 1.18 (m, 2H), 1.15 – 1.10 (m, 2H).

**<sup>13</sup>C NMR (126 MHz, CDCl<sub>3</sub>)** δ 154.6, 145.3, 137.5, 136.1, 134.1, 129.7, 129.3, 128.7, 118.6, 92.4, 83.2, 28.7, 21.8, 10.4.

**HRMS (ESI) m/z:** [M+H]<sup>+</sup> Calcd for C<sub>19</sub>H<sub>17</sub>ClNO<sub>3</sub>S<sup>+</sup> 374.0612; Found 374.0606.

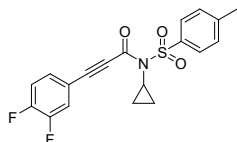

***N*-cyclopropyl-3-(3,4-difluorophenyl)-*N*-tosylpropiolamide (1j).** The compound was prepared according to the general procedure to give a brown solid.

**<sup>1</sup>H NMR (500 MHz, CDCl<sub>3</sub>)** δ 7.95 (d, *J* = 8.3 Hz, 2H), 7.65 – 7.58 (m, 6H), 7.47 (t, *J* = 7.6 Hz, 2H), 7.40 (t, *J* = 7.3 Hz, 1H), 7.34 (d, *J* = 8.2 Hz, 2H), 2.95 (ddd, *J* = 10.5, 7.0, 3.7 Hz, 1H), 2.45 (s, 3H), 1.24 (dd, *J* = 10.8, 4.1 Hz, 2H), 1.16 (dd, *J* = 10.1, 7.4 Hz, 2H).

**<sup>13</sup>C NMR (126 MHz, CDCl<sub>3</sub>)** δ 154., 153.2, 151.1, 149.1, 145.3, 135.9, 129.9, 129.6, 128.5, 121.7, 118.2, 116.5, 91.0, 82.5, 28.6, 21.7, 10.3.

**<sup>19</sup>F NMR (471 MHz, CDCl<sub>3</sub>)** δ -130.69 (s), -135.47 (s).

**HRMS (ESI) m/z:** [M+H]<sup>+</sup> Calcd for C<sub>19</sub>H<sub>16</sub>NO<sub>3</sub>S<sup>+</sup> 376.0813; Found 376.0811.

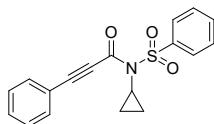

***N*-cyclopropyl-3-phenyl-*N*-(phenylsulfonyl)propiolamide (1i).** The compound was prepared according to the general procedure to give a white solid.

**<sup>1</sup>H NMR (500 MHz, CDCl<sub>3</sub>)** δ 8.05 (d, *J* = 7.7 Hz, 2H), 7.63 (t, *J* = 7.2 Hz, 1H), 7.53 (s, 4H), 7.46 (t, *J* = 7.3 Hz, 1H), 7.37 (t, *J* = 7.3 Hz, 2H), 2.95 (s, 1H), 1.23 (d, *J* = 6.0 Hz, 2H), 1.14 (s, 2H).

**<sup>13</sup>C NMR (126 MHz, CDCl<sub>3</sub>)** δ 154.8, 139.1, 134.0, 132.9, 131.1, 129.0, 128.8, 128.6, 119.7, 94.0, 82.4, 28.8, 10.5.

**HRMS (ESI) m/z:** [M+H]<sup>+</sup> Calcd for C<sub>18</sub>H<sub>16</sub>NO<sub>3</sub>S<sup>+</sup> 326.0845; Found 326.0842.

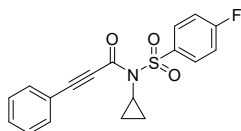

***N*-cyclopropyl-*N*-((4-fluorophenyl)sulfonyl)-3-phenylpropiolamide (1m).** The compound was prepared according to the general procedure to give a white solid.

**<sup>1</sup>H NMR (500 MHz, CDCl<sub>3</sub>)** δ 8.12 – 8.06 (m, 2H), 7.57 – 7.52 (m, 2H), 7.48 (dd, *J* = 10.7, 4.3 Hz, 1H), 7.39 (t, *J* = 7.6 Hz, 2H), 7.24 – 7.18 (m, 2H), 2.99 – 2.93 (m, 1H), 1.24 (d, *J* = 6.3 Hz, 2H), 1.19 – 1.13 (m, 2H), 0.86 (ddd, *J* = 18.7, 11.5, 6.7 Hz, 2H).

**<sup>13</sup>C NMR (126 MHz, CDCl<sub>3</sub>)** δ 167.0, 164.9, 154.8, 135.0, 132.9, 131.8, 131.2, 128.9, 119.6, 116.4, 116.2, 94.2, 82.3, 28.8, 10.6.

**<sup>19</sup>F NMR (471 MHz, CDCl<sub>3</sub>)** δ -102.75 (s).

**HRMS (ESI) m/z:** [M+H]<sup>+</sup> Calcd for C<sub>18</sub>H<sub>15</sub>FNO<sub>2</sub>S<sup>+</sup> 344.0751; Found 344.0746.

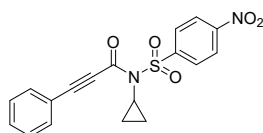

***N*-cyclopropyl-*N*-((4-nitrophenyl)sulfonyl)-3-phenylpropiolamide (1n).** The compound was prepared according to the general procedure to give a white solid.

**<sup>1</sup>H NMR (500 MHz, CDCl<sub>3</sub>)** δ 8.43 – 8.35 (m, 2H), 8.28 – 8.22 (m, 2H), 7.58 – 7.53 (m, 2H), 7.52 – 7.47 (m, 1H), 7.41 (t, *J* = 7.6 Hz, 2H), 3.05 – 2.98 (m, 1H), 1.32 – 1.28 (m, 2H), 1.22 – 1.16 (m, 2H).

**<sup>13</sup>C NMR (126 MHz, CDCl<sub>3</sub>)** δ 154.7, 150.6, 144.4, 132.9, 131.3, 130.1, 128.8, 124.0, 119.1, 95.0, 81.8, 28.8, 10.6.

**HRMS (ESI) m/z:** [M+H]<sup>+</sup> Calcd for C<sub>18</sub>H<sub>15</sub>N<sub>2</sub>O<sub>5</sub>S<sup>+</sup> 371.0696; Found 371.0691.

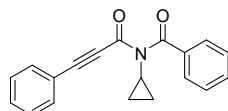

***N*-cyclopropyl-*N*-(3-phenylpropioloyl)benzamide (1o).** The compound was prepared according to the general procedure to give a yellow oil.

**<sup>1</sup>H NMR (500 MHz, CDCl<sub>3</sub>)** δ 7.90 – 7.65 (m, 2H), 7.56 (t, *J* = 7.4 Hz, 1H), 7.45 (t, *J* = 7.7 Hz, 2H), 7.42 – 7.37 (m, 1H), 7.36 – 7.27 (m, 4H), 3.16 – 2.90 (m, 1H), 1.08 (q, *J* = 6.8 Hz, 2H), 0.83 – 0.72 (m, 2H).

**<sup>13</sup>C NMR (126 MHz, CDCl<sub>3</sub>)** δ 173.9, 155.5, 135.3, 133.1, 132.7, 130.6, 129.20, 128.5, 119.7, 93.8, 82.6, 28.6, 9.4.

**HRMS (ESI) m/z:** [M+H]<sup>+</sup> Calcd for C<sub>19</sub>H<sub>16</sub>NO<sub>2</sub><sup>+</sup> 290.1176; Found 290.1171.

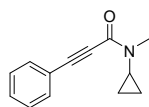

***N*-cyclopropyl-*N*-methyl-3-phenylpropiolamide (1k).** The compound was prepared according to the general procedure to give a white solid.

**<sup>1</sup>H NMR (500 MHz, CDCl<sub>3</sub>)** δ 7.55 – 7.50 (m, 2H), 7.39 – 7.32 (m, 3H), 2.96 (s, 3H), 2.84 (ddd, *J* = 10.7, 7.0, 4.0 Hz, 1H), 0.96 – 0.90 (m, 2H), 0.90 – 0.86 (m, 2H).

**<sup>13</sup>C NMR (126 MHz, CDCl<sub>3</sub>)** δ 132.2, 132.2, 129.8, 128.4, 120.8, 90.5, 82.9, 33.7, 31.7, 8.7.

**HRMS (ESI) m/z:** [M+H]<sup>+</sup> Calcd for C<sub>13</sub>H<sub>14</sub>NO<sup>+</sup> 200.1070; Found 200.1068.



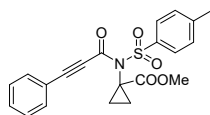

**methyl 1-(3-phenyl-*N*-tosylpropiolamido)cyclopropane-1-carboxylate (1p).** The compound was prepared according to the general procedure to give a white solid.

**<sup>1</sup>H NMR (500 MHz, CDCl<sub>3</sub>)** δ 8.03 (d, *J* = 8.1 Hz, 2H), 7.47 – 7.39 (m, 3H), 7.38 – 7.28 (m, 4H), 3.81 – 3.71 (m, 3H), 2.46 – 2.33 (m, 3H), 2.12 (ddd, *J* = 7.1, 4.1, 2.4 Hz, 1H), 2.05 – 1.91 (m, 2H), 1.65 – 1.54 (m, 1H).

**<sup>13</sup>C NMR (126 MHz, CDCl<sub>3</sub>)** δ 171.7, 154.0, 145.3, 135.2, 132.8, 131.1, 129.9, 129.2, 128.7, 119.2, 93.5, 81.7, 53.0, 39.6, 22.9, 21.7, 21.3.

**HRMS (ESI) m/z:** [M+H]<sup>+</sup> Calcd for C<sub>23</sub>H<sub>25</sub>N<sub>2</sub>O<sub>2</sub><sup>+</sup> 361.1911; Found 361.1907.

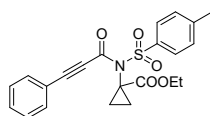

**ethyl 1-(3-phenyl-*N*-tosylpropiolamido)cyclopropane-1-carboxylate (1q).** The compound was prepared according to the general procedure to give a yellow solid.

**<sup>1</sup>H NMR (500 MHz, CDCl<sub>3</sub>)** δ 7.99 (d, *J* = 8.4 Hz, 2H), 7.42 – 7.33 (m, 3H), 7.27 (dd, *J* = 19.5, 7.9 Hz, 4H), 4.26 – 4.10 (m, 2H), 2.35 (s, 3H), 2.11 – 2.03 (m, 1H), 2.00 – 1.85 (m, 2H), 1.58 – 1.45 (m, 1H), 1.16 (t, *J* = 7.1 Hz, 3H).

**<sup>13</sup>C NMR (126 MHz, CDCl<sub>3</sub>)** δ 171.0, 154.0, 145.2 (s), 135.3 (s), 132.6, 131.1, 129.7, 129.0, 128.7, 119.0, 93.2, 81.7, 62.0, 39.6, 22.8, 21.5, 20.9, 14.1.

**HRMS (ESI) m/z:** [M+H]<sup>+</sup> Calcd for C<sub>23</sub>H<sub>25</sub>NO<sub>5</sub><sup>+</sup> 398.1057; Found 398.1055.

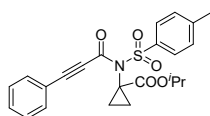

**isopropyl 1-(3-phenyl-*N*-tosylpropiolamido)cyclopropane-1-carboxylate (1r).** The compound was prepared according to the general procedure to give a yellow solid.

**<sup>1</sup>H NMR (500 MHz, CDCl<sub>3</sub>)** δ 8.05 (d, *J* = 8.4 Hz, 2H), 7.48 – 7.42 (m, 3H), 7.39 – 7.29 (m, 4H), 5.10 (hept, *J* = 6.3 Hz, 1H), 2.43 (s, 3H), 2.15 – 2.08 (m, 1H), 2.01 – 1.92 (m, 2H), 1.60 – 1.54 (m, 1H), 1.29 (d, *J* = 6.3 Hz, 3H), 1.19 (d, *J* = 6.3 Hz, 3H).

**<sup>13</sup>C NMR (126 MHz, CDCl<sub>3</sub>)** δ 168.0, 164.7, 145.2, 141.6, 135.6, 133.1, 131.0, 130.1, 129.5, 129.2, 128.2, 127.7, 70.3, 44.4, 28.4, 24.1, 21.9, 21.8, 21.8, 1.1.

**HRMS (ESI) m/z:** [M+H]<sup>+</sup> Calcd for C<sub>23</sub>H<sub>24</sub>NO<sub>5</sub><sup>+</sup> 426.1370; Found 426.1364.

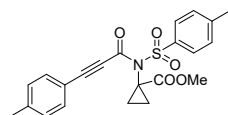

**methyl 1-(3-(*p*-tolyl)-*N*-tosylpropiolamido)cyclopropane-1-carboxylate (1s).** The compound was prepared according to the general procedure to give a foam yellow solid.

**<sup>1</sup>H NMR (500 MHz, CDCl<sub>3</sub>)** δ 8.03 (d, *J* = 8.4 Hz, 2H), 7.33 (dd, *J* = 8.0, 5.1 Hz, 4H), 7.16 (d, *J* = 7.9 Hz, 2H), 3.76 (s, 3H), 2.43 (s, 3H), 2.37 (s, 3H), 2.16 – 2.09 (m, 1H), 1.98 (ddt, *J* = 13.3, 8.6, 4.5 Hz, 2H), 1.64 – 1.57 (m, 1H).

$^{13}\text{C}$  NMR (126 MHz,  $\text{CDCl}_3$ )  $\delta$  171.8, 154.2, 145.3, 142.0, 135.3, 132.8, 129.9, 129.5, 129.0, 116.1, 94.2, 81.6, 53.0, 39.6, 22.9, 21.7, 21.7, 21.3.

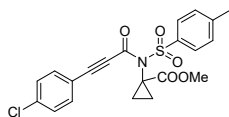

**methyl 1-(3-(4-chlorophenyl)-N-tosylpropiolamido)cyclopropane-1-carboxylate (1t).** The compound was prepared according to the general procedure to give a foam yellow solid.

$^1\text{H}$  NMR (500 MHz,  $\text{CDCl}_3$ )  $\delta$  8.02 (d,  $J = 8.4$  Hz, 2H), 7.39 – 7.30 (m, 6H), 3.76 (s, 3H), 2.43 (s, 3H), 2.16 – 2.09 (m, 1H), 2.02 – 1.93 (m, 2H), 1.59 (dt,  $J = 8.2, 6.1$  Hz, 1H).

$^{13}\text{C}$  NMR (126 MHz,  $\text{CDCl}_3$ )  $\delta$  171.6, 153.8, 145.3, 137.5, 135.1, 133.9, 129.9, 129.2, 129.0, 117.6, 92.1, 82.4, 52.9, 39.5, 22.7, 21.6, 21.2.

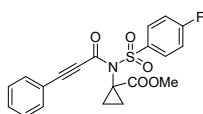

**Methyl 1-(N-((4-fluorophenyl)sulfonyl)-3-phenylpropiolamido)cyclopropane-1-carboxylate (1u).** The compound was prepared according to the general procedure to give a foam yellow solid.

$^1\text{H}$  NMR (500 MHz,  $\text{CDCl}_3$ )  $\delta$  8.25 – 8.14 (m, 2H), 7.49 – 7.43 (m, 3H), 7.37 (dd,  $J = 10.5, 4.8$  Hz, 2H), 7.21 (t,  $J = 8.6$  Hz, 2H), 3.77 (s, 3H), 2.15 (ddd,  $J = 9.4, 5.4, 2.2$  Hz, 1H), 2.01 (tdd,  $J = 13.8, 8.6, 5.0$  Hz, 2H), 1.68 – 1.61 (m, 1H).

$^{13}\text{C}$  NMR (126 MHz,  $\text{CDCl}_3$ )  $\delta$  171.6, 154.0, 133.16, 133.1, 132.8, 131.2, 128.7, 119.0, 115.7, 115.5, 93.9, 81.5, 53.0, 39.6, 22.7, 21.3.

$^{19}\text{F}$  NMR (471 MHz,  $\text{CDCl}_3$ )  $\delta$  -102.48.

**HRMS (ESI) m/z:**  $[\text{M}+\text{H}]^+$  Calcd for  $\text{C}_{20}\text{H}_{16}\text{FNO}_5\text{S}^+$  402.0806; Found 402.0816.

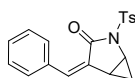

**(Z)-4-benzylidene-2-tosyl-2-azabicyclo[3.1.0]hexan-3-one (2a).** The compound was prepared according to the general procedure to give a yellow solid.

$^1\text{H}$  NMR (500 MHz,  $\text{CDCl}_3$ )  $\delta$  7.96 (d,  $J = 8.3$  Hz, 2H), 7.76 (dd,  $J = 7.6, 1.6$  Hz, 2H), 7.32 (dd,  $J = 7.5, 5.2$  Hz, 5H), 6.96 (s, 1H), 4.00 (ddd,  $J = 7.2, 5.1, 2.4$  Hz, 1H), 2.41 (s, 3H), 2.35 (td,  $J = 7.8, 4.8$  Hz, 1H), 1.15 – 1.08 (m, 1H), 0.55 – 0.49 (m, 1H).

$^{13}\text{C}$  NMR (126 MHz,  $\text{CDCl}_3$ )  $\delta$  163.9, 145.3, 140.3, 135.3, 133.4, 130.8, 129.8, 128.4, 128.2, 33.7, 21.8, 17.7, 16.4.

**HRMS (ESI) m/z:**  $[\text{M}+\text{H}]^+$  Calcd for  $\text{C}_{19}\text{H}_{18}\text{NO}_2\text{S}^+$  340.1002; Found 340.0997.

$[\alpha]_{\text{D}}^{20}$  -20 ( $c$  1.0,  $\text{CHCl}_3$ , 85% ee sample).

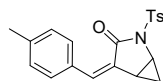

**(Z)-4-(4-methylbenzylidene)-2-tosyl-2-azabicyclo[3.1.0]hexan-3-one (2b).** The compound was prepared according to the general procedure to give a yellow solid.

**<sup>1</sup>H NMR (500 MHz, CDCl<sub>3</sub>)** δ 7.96 (d, *J* = 8.3 Hz, 2H), 7.68 (d, *J* = 8.1 Hz, 2H), 7.30 (d, *J* = 8.1 Hz, 2H), 7.13 (d, *J* = 8.0 Hz, 2H), 6.92 (s, 1H), 3.98 (ddd, *J* = 7.3, 5.0, 2.5 Hz, 1H), 2.41 (s, 3H), 2.37 – 2.26 (m, 4H), 1.09 (ddd, *J* = 8.5, 6.1, 5.3 Hz, 1H), 0.54 – 0.43 (m, 1H).

**<sup>13</sup>C NMR (126 MHz, CDCl<sub>3</sub>)** δ 164.1, 145.2, 140.5, 140.1, 135.4, 130.9, 129.7, 128.9, 128.4, 33.6, 21.8, 21.6, 17.5, 16.5.

**HRMS (ESI) m/z:** [M+H]<sup>+</sup> Calcd for C<sub>20</sub>H<sub>20</sub>NO<sub>3</sub>S<sup>+</sup> 354.1158; Found 354.1156.

[α]<sub>D</sub><sup>20</sup> -270 (*c* 1.0, CHCl<sub>3</sub>, 80% ee sample).

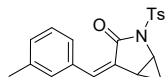

**(Z)-4-(3-methylbenzylidene)-2-tosyl-2-azabicyclo[3.1.0]hexan-3-one (2c).** The compound was prepared according to the general procedure to give a yellow solid.

**<sup>1</sup>H NMR (500 MHz, CDCl<sub>3</sub>)** δ 7.97 (d, *J* = 8.3 Hz, 2H), 7.63 (d, *J* = 7.7 Hz, 1H), 7.51 (s, 1H), 7.32 (d, *J* = 8.1 Hz, 2H), 7.23 (t, *J* = 7.7 Hz, 1H), 7.13 (d, *J* = 7.6 Hz, 1H), 6.94 (s, 1H), 4.00 (ddd, *J* = 7.2, 5.0, 2.5 Hz, 1H), 2.42 (s, 3H), 2.38 – 2.32 (m, 4H), 1.11 (ddd, *J* = 8.5, 6.1, 5.3 Hz, 1H), 0.54 – 0.49 (m, 1H).

**<sup>13</sup>C NMR (126 MHz, CDCl<sub>3</sub>)** δ 163.8, 145.2, 140.5, 137.8, 135.4, 133.4, 131.4, 130.5, 129.7, 128.4, 128.1, 127.9, 33.7, 21.8, 21.5, 17.7, 16.5.

**HRMS (ESI) m/z:** [M+H]<sup>+</sup> Calcd for C<sub>20</sub>H<sub>20</sub>NO<sub>3</sub>S<sup>+</sup> 354.1158; Found 354.1154.

[α]<sub>D</sub><sup>20</sup> -150 (*c* 1.0, CHCl<sub>3</sub>, 79% ee sample).

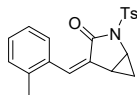

**(Z)-4-(2-methylbenzylidene)-2-tosyl-2-azabicyclo[3.1.0]hexan-3-one (2d).** The compound was prepared according to the general procedure to give a yellow solid.

**<sup>1</sup>H NMR (500 MHz, CDCl<sub>3</sub>)** δ 7.94 (d, *J* = 8.3 Hz, 1H), 7.55 (d, *J* = 7.6 Hz, 1H), 7.30 (d, *J* = 8.1 Hz, 1H), 7.21 (t, *J* = 7.3 Hz, 1H), 7.14 (d, *J* = 7.4 Hz, 2H), 2.42 (s, 1H), 2.38 (td, *J* = 7.8, 4.9 Hz, 1H), 2.26 (s, 2H), 1.18 – 1.11 (m, 1H), 0.93 – 0.86 (m, 1H).

**<sup>13</sup>C NMR (126 MHz, CDCl<sub>3</sub>)** δ 163.8, 145.3, 140.5, 137.8, 135.4, 133.4, 131.4, 130.5, 129.7, 128.4, 128.1, 127.9, 33.7, 21.8, 21.5, 17.7, 16.5.

**HRMS (ESI) m/z:** [M+H]<sup>+</sup> Calcd for C<sub>20</sub>H<sub>20</sub>NO<sub>3</sub>S<sup>+</sup> 354.1158; Found 354.1155.

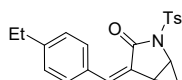

**(Z)-4-(4-ethylbenzylidene)-2-tosyl-2-azabicyclo[3.1.0]hexan-3-one (2e).** The compound was prepared according to the general procedure to give a yellow solid.

**<sup>1</sup>H NMR (500 MHz, CDCl<sub>3</sub>)** δ 7.97 (d, *J* = 8.2 Hz, 2H), 7.71 (d, *J* = 8.1 Hz, 2H), 7.31 (d, *J* = 8.1 Hz, 2H), 7.16 (d, *J* = 8.1 Hz, 2H), 6.94 (s, 1H), 4.04 – 3.96 (m, 1H), 2.64 (q, *J* = 7.6 Hz, 2H), 2.42 (s, 3H), 2.38 – 2.29 (m, 1H), 1.22 (t, *J* = 7.6 Hz, 3H), 1.10 (dt, *J* = 8.5, 5.7 Hz, 1H), 0.56 – 0.48 (m, 1H).

$^{13}\text{C}$  NMR (126 MHz,  $\text{CDCl}_3$ )  $\delta$  163.9, 146.2, 145.0, 140.4, 135.3, 130.9, 129.6, 128.7, 128.3, 127.6, 33.5, 28.8, 21.7, 17.5, 16.4, 15.3.

HRMS (ESI)  $m/z$ :  $[\text{M}+\text{H}]^+$  Calcd for  $\text{C}_{21}\text{H}_{22}\text{NO}_3\text{S}^+$  368.1315; Found 368.1311.

$[\alpha]_{\text{D}}^{20}$  -10 ( $c$  1.0,  $\text{CHCl}_3$ , 71% ee sample).

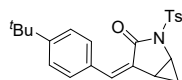

(*Z*)-4-(4-(*tert*-butyl)benzylidene)-2-tosyl-2-azabicyclo[3.1.0]hexan-3-one (**2h**). The compound was prepared according to the general procedure to give a yellow solid.

$^1\text{H}$  NMR (500 MHz,  $\text{CDCl}_3$ )  $\delta$  7.89 (dd,  $J = 8.0, 1.0$  Hz, 1H), 7.38 (d,  $J = 7.4$  Hz, 2H), 7.34 (m, 1H), 7.28 (dd,  $J = 10.5, 4.8$  Hz, 2H), 7.24 – 7.17 (m, 2H), 6.99 (m, 1H), 1.60 (dd,  $J = 8.9, 6.8$  Hz, 2H), 1.10 (dd,  $J = 8.9, 6.8$  Hz, 2H).

$^{13}\text{C}$  NMR (126 MHz,  $\text{CDCl}_3$ )  $\delta$  164.1, 153.1, 145.2, 140.3, 135.4, 130.8, 129.8, 129.0, 128.4, 125.2, 34.9, 33.6, 31.2, 21.8, 17.6, 16.5.

HRMS (ESI)  $m/z$ :  $[\text{M}+\text{H}]^+$  Calcd for  $\text{C}_{23}\text{H}_{26}\text{NO}_3\text{S}^+$  396.1628; Found 396.1625.

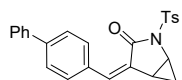

(*Z*)-4-([1,1'-biphenyl]-4-ylmethylene)-2-tosyl-2-azabicyclo[3.1.0]hexan-3-one (**2i**). The compound was prepared according to the general procedure to give a yellow solid.

$^1\text{H}$  NMR (500 MHz,  $\text{CDCl}_3$ )  $\delta$  7.99 (d,  $J = 8.3$  Hz, 2H), 7.87 (d,  $J = 8.3$  Hz, 2H), 7.64 – 7.53 (m, 4H), 7.45 (t,  $J = 7.6$  Hz, 2H), 7.37 (d,  $J = 7.3$  Hz, 1H), 7.34 (t,  $J = 7.1$  Hz, 2H), 7.00 (s, 1H), 4.03 (ddd,  $J = 7.2, 5.1, 2.4$  Hz, 1H), 2.43 (s, 3H), 2.38 (td,  $J = 7.7, 4.9$  Hz, 1H), 1.17 – 1.10 (m, 1H), 0.60 – 0.50 (m, 1H).

$^{13}\text{C}$  NMR (126 MHz,  $\text{CDCl}_3$ )  $\delta$  164.0, 145.3, 142.3, 140.5, 139.9, 135.3, 132.5, 131.4, 129.8, 128.9, 128.4, 127.8, 127.2, 126.8, 33.8, 21.8, 17.8, 16.6.

HRMS (ESI)  $m/z$ :  $[\text{M}+\text{H}]^+$  Calcd for  $\text{C}_{25}\text{H}_{22}\text{NO}_3\text{S}^+$  416.1315; Found 416.1310.

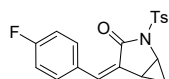

(*Z*)-4-(4-fluorobenzylidene)-2-tosyl-2-azabicyclo[3.1.0]hexan-3-one (**2f**). The compound was prepared according to the general procedure to give a yellow solid.

$^1\text{H}$  NMR (500 MHz,  $\text{CDCl}_3$ )  $\delta$  7.96 (d,  $J = 7.6$  Hz, 2H), 7.83 – 7.74 (m, 2H), 7.32 (d,  $J = 7.8$  Hz, 2H), 6.99 (t,  $J = 8.1$  Hz, 2H), 6.91 (s, 1H), 4.00 (s, 1H), 2.42 (s, 3H), 2.38 – 2.31 (m, 1H), 1.12 (dd,  $J = 12.5, 6.4$  Hz, 1H), 0.52 (s, 1H).

$^{13}\text{C}$  NMR (126 MHz,  $\text{CDCl}_3$ )  $\delta$  163.8, 145.2, 138.8, 135.0, 132.9, 132.9, 129.6, 129.4, 128.2, 115.1, 114.9, 33.6, 21.6, 17.5, 16.2.

HRMS (ESI)  $m/z$ :  $[\text{M}+\text{H}]^+$  Calcd for  $\text{C}_{19}\text{H}_{17}\text{FNO}_2\text{S}^+$  358.0908; Found 358.0901.

$[\alpha]_{\text{D}}^{20}$  -340 ( $c$  1.0,  $\text{CHCl}_3$ , 84% ee sample).

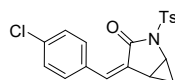

**(Z)-4-(4-chlorobenzylidene)-2-tosyl-2-azabicyclo[3.1.0]hexan-3-one (2g).** The compound was prepared according to the general procedure to give a yellow solid.

**<sup>1</sup>H NMR (500 MHz, CDCl<sub>3</sub>)** δ 7.97 (d, *J* = 8.3 Hz, 2H), 7.72 (d, *J* = 8.5 Hz, 2H), 7.34 (d, *J* = 8.2 Hz, 2H), 7.30 (d, *J* = 8.6 Hz, 2H), 6.91 (s, 1H), 4.03 (ddd, *J* = 7.2, 5.0, 2.4 Hz, 1H), 2.44 (s, 3H), 2.36 (td, *J* = 7.7, 4.9 Hz, 1H), 1.19 – 1.12 (m, 1H), 0.56 (ddd, *J* = 6.7, 4.6, 2.5 Hz, 1H).

**<sup>13</sup>C NMR (126 MHz, CDCl<sub>3</sub>)** δ 163.9, 145.4, 138.7, 135.4, 135.2, 132.2, 131.9, 130.6, 129.8, 128.4, 33.9, 21.8, 17.9, 16.5.

**HRMS (ESI) m/z:** [M+H]<sup>+</sup> Calcd for C<sub>19</sub>H<sub>17</sub>ClNO<sub>3</sub>S<sup>+</sup> 374.0612; Found 374.0606.

[α]<sub>D</sub><sup>20</sup> -70 (*c* 1.0, CHCl<sub>3</sub>, 85% ee sample).

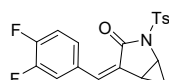

**(Z)-4-(3,4-difluorobenzylidene)-2-tosyl-2-azabicyclo[3.1.0]hexan-3-one (2j).** The compound was prepared according to the general procedure to give a yellow solid.

**<sup>1</sup>H NMR (500 MHz, CDCl<sub>3</sub>)** δ 7.95 (d, *J* = 8.3 Hz, 2H), 7.65 – 7.58 (m, 6H), 7.47 (t, *J* = 7.6 Hz, 2H), 7.40 (t, *J* = 7.3 Hz, 1H), 7.34 (d, *J* = 8.2 Hz, 2H), 2.95 (ddd, *J* = 10.5, 7.0, 3.7 Hz, 1H), 2.45 (s, 3H), 1.24 (dd, *J* = 10.8, 4.1 Hz, 2H), 1.16 (dd, *J* = 10.1, 7.4 Hz, 2H).

**<sup>13</sup>C NMR (126 MHz, CDCl<sub>3</sub>)** δ 163.8 (s), 151.9, 150.7, 149.9, 148.8, 145.5, 137.7, 135.1, 131.1, 130.5, 129.9, 128.4, 127.8, 119.7, 116.9, 34.0, 21.8, 18.0, 16.5.

**<sup>19</sup>F NMR (471 MHz, CDCl<sub>3</sub>)** δ -255.60 (s), -258.05 (s).

**HRMS (ESI) m/z:** [M+H]<sup>+</sup> Calcd for C<sub>19</sub>H<sub>16</sub>NO<sub>3</sub>S<sup>+</sup> 376.0813; Found 376.0810.

[α]<sub>D</sub><sup>20</sup> -340 (*c* 1.0, CHCl<sub>3</sub>, 85% ee sample).

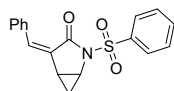

**(Z)-4-benzylidene-2-(phenylsulfonyl)-2-azabicyclo[3.1.0]hexan-3-one (2i).** The compound was prepared according to the general procedure to give a yellow solid.

**<sup>1</sup>H NMR (500 MHz, CDCl<sub>3</sub>)** δ 8.10 – 8.06 (m, 2H), 7.75 (dd, *J* = 7.5, 1.6 Hz, 2H), 7.62 (d, *J* = 7.5 Hz, 1H), 7.52 (t, *J* = 7.8 Hz, 2H), 7.32 (d, *J* = 7.1 Hz, 3H), 6.97 (s, 1H), 4.01 (ddd, *J* = 7.3, 5.0, 2.5 Hz, 1H), 2.36 (td, *J* = 7.7, 4.9 Hz, 1H), 1.12 (ddd, *J* = 8.5, 6.1, 5.2 Hz, 1H), 0.55 – 0.46 (m, 1H).

**<sup>13</sup>C NMR (126 MHz, CDCl<sub>3</sub>)** δ 163.8, 140.6, 133.2, 131.2, 131.2, 130.6, 129.6, 129.4, 128.1, 116.4, 116.3, 33.5, 17.6, 16.3.

**HRMS (ESI) m/z:** [M+H]<sup>+</sup> Calcd for C<sub>18</sub>H<sub>16</sub>NO<sub>3</sub>S<sup>+</sup> 326.0845; Found 326.0841.

[α]<sub>D</sub><sup>20</sup> -230 (*c* 1.0, CHCl<sub>3</sub>, 83% ee sample).

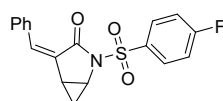

**(Z)-4-benzylidene-2-((4-fluorophenyl)sulfonyl)-2-azabicyclo[3.1.0]hexan-3-one (2m).** The compound was prepared according to the general procedure to give a yellow solid.

**<sup>1</sup>H NMR (500 MHz, CDCl<sub>3</sub>)** δ 8.14 – 8.09 (m, 2H), 7.75 (dd, *J* = 7.5, 2.0 Hz, 2H), 7.36 – 7.32 (m, 3H), 7.20 (t, *J* = 8.5 Hz, 2H), 7.00 (s, 1H), 4.01 (ddd, *J* = 7.2, 5.0, 2.4 Hz, 1H), 2.39 (td, *J* = 7.7, 4.7 Hz, 1H), 1.17 – 1.11 (m, 1H), 0.57 – 0.49 (m, 1H).

**<sup>13</sup>C NMR (126 MHz, CDCl<sub>3</sub>)** δ 163.7, 140.3, 138.7, 134.0, 133.2, 130.6, 129.6, 129.5, 129.0, 128.2, 128.0, 33.6, 17.6, 16.3.

**<sup>19</sup>F NMR (471 MHz, CDCl<sub>3</sub>)** δ -102.66 (s).

**HRMS (ESI) m/z:** [M+H]<sup>+</sup> Calcd for C<sub>18</sub>H<sub>15</sub>FNO<sub>2</sub>S<sup>+</sup> 344.0751; Found 344.0748.

[α]<sub>D</sub><sup>20</sup> -30 (*c* 1.0, CHCl<sub>3</sub>, 80% ee sample).

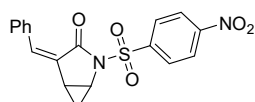

**(Z)-4-benzylidene-2-((4-nitrophenyl)sulfonyl)-2-azabicyclo[3.1.0]hexan-3-one (2n).** The compound was prepared according to the general procedure to give a yellow solid.

**<sup>1</sup>H NMR (500 MHz, CDCl<sub>3</sub>)** δ 8.35 (dd, *J* = 8.8, 1.5 Hz, 2H), 8.30 – 8.25 (m, 2H), 7.75 – 7.67 (m, 2H), 7.34 (dd, *J* = 4.3, 1.5 Hz, 3H), 7.04 (s, 1H), 4.05 (ddd, *J* = 7.3, 5.1, 2.5 Hz, 1H), 2.46 – 2.40 (m, 1H), 1.20 (ddd, *J* = 8.6, 6.4, 5.1 Hz, 1H), 0.60 – 0.56 (m, 1H).

**<sup>13</sup>C NMR (126 MHz, CDCl<sub>3</sub>)** δ 163.8, 150.8, 143.4, 141.5, 133.0, 130.6, 129.8, 129.8, 129.7, 129.6, 128.9, 128.7, 128.1, 124.2, 124.2, 33.6, 17.6, 16.5, 1.0.

**HRMS (ESI) m/z:** [M+H]<sup>+</sup> Calcd for C<sub>18</sub>H<sub>15</sub>N<sub>2</sub>O<sub>5</sub>S<sup>+</sup> 371.0696; Found 371.0692.

[α]<sub>D</sub><sup>20</sup> -50 (*c* 1.0, CHCl<sub>3</sub>, 76% ee sample).

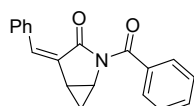

**(Z)-2-benzoyl-4-benzylidene-2-azabicyclo[3.1.0]hexan-3-one (2o).** The compound was prepared according to the general procedure to give a yellow oil.

**<sup>1</sup>H NMR (500 MHz, CDCl<sub>3</sub>)** δ 8.11 – 8.06 (m, 1H), 7.76 (dd, *J* = 7.5, 1.6 Hz, 1H), 7.63 (t, *J* = 7.5 Hz, 1H), 7.53 (t, *J* = 7.8 Hz, 1H), 7.33 (d, *J* = 7.1 Hz, 1H), 6.98 (s, 1H), 4.02 (ddd, *J* = 7.3, 5.0, 2.5 Hz, 1H), 2.37 (td, *J* = 7.7, 4.9 Hz, 1H), 1.13 (ddd, *J* = 8.5, 6.1, 5.2 Hz, 1H), 0.55 – 0.48 (m, 1H).

**<sup>13</sup>C NMR (126 MHz, CDCl<sub>3</sub>)** δ 166.9, 165.3, 143.6, 135.5, 132.0, 129.4, 128.9, 128.8, 128.8, 128.6, 128.0, 126.9, 24.7, 8.4, 1.0.

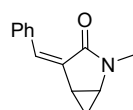

**(Z)-4-benzylidene-2-methyl-2-azabicyclo[3.1.0]hexan-3-one (2k).** The compound was prepared according to the general procedure to give a yellow solid.

**<sup>1</sup>H NMR (500 MHz, CDCl<sub>3</sub>)** δ 7.89 (d, *J* = 7.6 Hz, 2H), 7.35 (t, *J* = 7.5 Hz, 2H), 7.29 (d, *J* = 7.1 Hz, 1H), 6.91 (s, 1H), 3.26 (ddd, *J* = 6.8, 4.8, 2.3 Hz, 1H), 2.97 (s, 3H), 2.27 (td, *J* = 7.4, 4.7 Hz, 1H), 1.03 (dt, *J* = 8.4, 5.1 Hz, 1H), 0.69 (td, *J* = 5.5, 2.3 Hz, 1H).

**<sup>13</sup>C NMR (126 MHz, CDCl<sub>3</sub>)** δ 166.1, 135.0, 134.6, 133.0, 130.5, 128.3, 127.9, 36.1, 30.0, 19.4, 16.7.

**HRMS (ESI) m/z:** [M+H]<sup>+</sup> Calcd for C<sub>13</sub>H<sub>14</sub>NO<sup>+</sup> 200.1070; Found 200.1068.

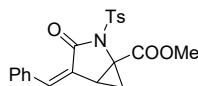

**methyl (Z)-4-benzylidene-3-oxo-2-tosyl-2-azabicyclo[3.1.0]hexane-1-carboxylate (2p).** The compound was prepared according to the general procedure to give a yellow solid.

**<sup>1</sup>H NMR (500 MHz, CDCl<sub>3</sub>)** δ 8.09 (d, *J* = 8.4 Hz, 2H), 7.77 (dd, *J* = 6.8, 2.8 Hz, 2H), 7.35 – 7.30 (m, 5H), 7.01 (s, 1H), 3.85 (s, 3H), 2.73 – 2.66 (m, 1H), 2.41 (s, 3H), 2.26 (dd, *J* = 8.9, 6.0 Hz, 1H), 1.48 (t, *J* = 5.8 Hz, 1H).

**<sup>13</sup>C NMR (126 MHz, CDCl<sub>3</sub>)** δ 168.8, 164.4, 145.2, 141.7, 135.3, 132.8, 130.8, 129.9, 129.3, 129.0, 128.0, 127.2, 52.8, 43.9, 28.3, 24.1, 21.6.

**HRMS (ESI) m/z:** [M+H]<sup>+</sup> Calcd for C<sub>21</sub>H<sub>20</sub>NO<sub>5</sub>S<sup>+</sup> 398.1053; Found 398.1057.

**[α]<sub>D</sub><sup>20</sup>** 110 (*c* 1.0, CHCl<sub>3</sub>, 91% ee sample).

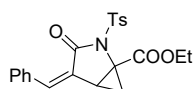

**ethyl (Z)-4-benzylidene-3-oxo-2-tosyl-2-azabicyclo[3.1.0]hexane-1-carboxylate (2q).** The compound was prepared according to the general procedure at 120 °C to give a yellow solid.

**<sup>1</sup>H NMR (500 MHz, CDCl<sub>3</sub>)** δ 8.10 (d, *J* = 8.3 Hz, 2H), 7.77 (dd, *J* = 6.5, 2.9 Hz, 2H), 7.37 – 7.30 (m, 5H), 7.02 (s, 1H), 4.39 – 4.26 (m, 2H), 2.69 (dd, *J* = 8.8, 5.6 Hz, 1H), 2.43 (s, 3H), 2.27 (dd, *J* = 8.9, 6.0 Hz, 1H), 1.48 (t, *J* = 5.8 Hz, 1H), 1.35 (t, *J* = 7.1 Hz, 3H).

**<sup>13</sup>C NMR (126 MHz, CDCl<sub>3</sub>)** δ 168.4, 164.5, 145.1, 141.6, 135.4, 132.9, 130.87, 130.0 (s), 129.4, 129.1, 128.1, 127.4, 62.2, 44.1, 28.4, 24.1, 21.7, 14.1, 1.0.

**HRMS (ESI) m/z:** [M+H]<sup>+</sup> Calcd for C<sub>22</sub>H<sub>22</sub>NO<sub>5</sub>S<sup>+</sup> 412.1213; Found 412.1209.

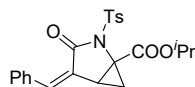

**isopropyl (Z)-4-benzylidene-3-oxo-2-tosyl-2-azabicyclo[3.1.0]hexane-1-carboxylate (2r).** The compound was prepared according to the general procedure at 120 °C to give a yellow solid.

**<sup>1</sup>H NMR (500 MHz, CDCl<sub>3</sub>)** δ 8.11 (d, *J* = 8.2 Hz, 2H), 7.78 (dd, *J* = 6.4, 2.7 Hz, 2H), 7.37 – 7.30 (m, 5H), 7.01 (s, 1H), 5.17 (dt, *J* = 12.5, 6.2 Hz, 1H), 2.67 (dd, *J* = 8.8, 5.6 Hz, 1H), 2.43 (s, 3H), 2.26 (s, 1H), 1.46 (t, *J* = 5.7 Hz, 1H), 1.34 (t, *J* = 6.4 Hz, 6H).

**<sup>13</sup>C NMR (126 MHz, CDCl<sub>3</sub>)** δ 168.0, 164.7, 145.2, 141.6, 135.6, 133.1, 131.0, 130.0, 129.5, 129.2, 128.2, 127.7, 70.2, 44.4, 28.4, 24.2, 21.9, 21.8, 21.8, 1.1.

**HRMS (ESI) m/z:** [M+H]<sup>+</sup> Calcd for C<sub>23</sub>H<sub>24</sub>NO<sub>5</sub>S<sup>+</sup> 426.1370; Found 426.1366.

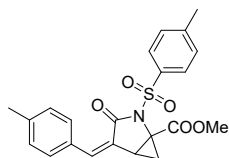

**methyl (Z)-4-(4-methylbenzylidene)-3-oxo-2-tosyl-2-azabicyclo[3.1.0]hexane-1-carboxylate (2s).** The compound was prepared according to the general procedure to give a yellow solid.

**<sup>1</sup>H NMR (500 MHz, CDCl<sub>3</sub>)** δ 8.08 (d, *J* = 8.3 Hz, 2H), 7.69 (d, *J* = 8.1 Hz, 2H), 7.32 (t, *J* = 12.6 Hz, 2H), 7.14 (d, *J* = 8.0 Hz, 2H), 6.97 (s, 1H), 3.84 (s, 3H), 2.68 (dd, *J* = 8.7, 5.7 Hz, 1H), 2.43 (s, 3H), 2.36 (d, *J* = 22.4 Hz, 3H), 2.24 (dt, *J* = 14.3, 7.2 Hz, 1H), 1.45 (dd, *J* = 15.2, 9.4 Hz, 1H).

**<sup>13</sup>C NMR (126 MHz, CDCl<sub>3</sub>)** δ 168.9, 164.5, 145.1, 141.8, 140.5, 135.4, 131.0, 130.2, 129.3, 129.0, 128.8, 126.1, 52.8, 43.8, 28.5, 24.0, 21.6, 21.5

**HRMS (ESI) m/z:** [M+H]<sup>+</sup> Calcd for C<sub>21</sub>H<sub>20</sub>NO<sub>5</sub>S<sup>+</sup> 398.1053; Found 98.1057.

[α]<sub>D</sub><sup>20</sup> -30 (*c* 1.0, CHCl<sub>3</sub>, 91% ee sample).

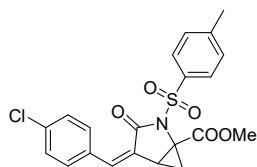

**methyl (Z)-4-(4-chlorobenzylidene)-3-oxo-2-tosyl-2-azabicyclo[3.1.0]hexane-1-carboxylate (2t).** The compound was prepared according to the general procedure to give a yellow solid.

**<sup>1</sup>H NMR (500 MHz, CDCl<sub>3</sub>)** δ 8.07 (d, *J* = 8.3 Hz, 2H), 7.71 (d, *J* = 8.5 Hz, 2H), 7.32 (dd, *J* = 26.7, 8.3 Hz, 4H), 6.94 (s, 1H), 3.84 (s, 3H), 2.69 (dd, *J* = 8.5, 5.8 Hz, 1H), 2.43 (s, 3H), 2.27 (dd, *J* = 8.9, 6.1 Hz, 1H), 1.50 (t, *J* = 5.8 Hz, 1H).

**<sup>13</sup>C NMR (126 MHz, CDCl<sub>3</sub>)** δ 168.7, 164.4, 145.3, 140.1, 135.8, 135.2, 132.2, 131.3, 129.4, 129.0, 128.3, 127.9, 52.9, 44.1, 28.3, 24.3, 21.7.

[α]<sub>D</sub><sup>20</sup> -280 (*c* 1.0, CHCl<sub>3</sub>, 91% ee sample).

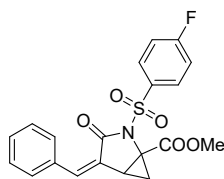

**Methyl(Z)-4-benzylidene-2-((4-fluorophenyl)sulfonyl)-3-oxo-2-azabicyclo[3.1.0]hexane-1-carboxylate (2u).** The compound was prepared according to the general procedure to give a yellow solid.

**<sup>1</sup>H NMR (500 MHz, CDCl<sub>3</sub>)** δ 8.29 – 8.22 (m, 2H), 7.79 – 7.72 (m, 2H), 7.38 – 7.32 (m, 3H), 7.22 (t, *J* = 8.6 Hz, 2H), 7.05 (s, 1H), 3.84 (s, 3H), 2.73 (dd, *J* = 8.8, 5.7 Hz, 1H), 2.29 (dd, *J* = 8.9, 6.1 Hz, 1H), 1.54 (t, *J* = 5.9 Hz, 1H).

**<sup>13</sup>C NMR (126 MHz, CDCl<sub>3</sub>)** δ 168.8, 164.5, 142.2, 132.8, 132.2, 132.1, 130.9, 130.1, 128.1, 127.0, 116.2, 116.0, 52.9, 44.0, 28.5, 24.5.

**<sup>19</sup>F NMR (471 MHz, CDCl<sub>3</sub>)** δ -102.71 (s).



**HRMS (ESI) m/z:**  $[M+H]^+$  Calcd for  $C_{20}H_{16}FNO_5S^+$  402.0806; Found 402.0813.

$[\alpha]_D^{20}$  -10 ( $c$  1.0,  $CHCl_3$ , 90% ee sample).

## 7 X-ray Crystal Structure Determination of the Products

To grow the crystals used to collect the X-ray data for **2f**, the following method was used: the sample was dissolved with 3 mL petroleum ether and 1 mL  $CH_2Cl_2$  in a small vial, which was kept aside at room temperature to obtain crystals.

A suitable crystal was selected on a ROD, Synergy Custom system, HyPix diffractometer. The crystal was kept at 296.6 K during data collection. Using Olex2, the structure was solved with the ShelXT structure solution program using Intrinsic Phasing and refined with the ShelXL refinement package using Least Squares minimisation. The data have been deposited at the Cambridge Crystallographic Data Center (CCDC 2257065).

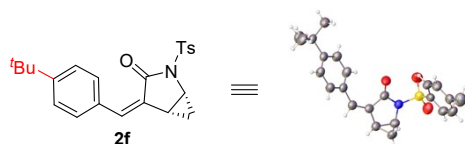

**Figure S2.** The X-ray Diffraction Configuration of **2f**.

*Table S8.* Crystallographic data for compounds **2f**

|                                  |                     |
|----------------------------------|---------------------|
| Identification code              | <b>2f</b>           |
| Empirical formula                | $C_{23}H_{25}NO_3S$ |
| Formula weight                   | 395.50              |
| Temperature/K                    | 298                 |
| Crystal system                   | Orthorhombic        |
| Space group                      | $Pna2_1$            |
| $a/\text{\AA}$                   | 15.4097(9)          |
| $b/\text{\AA}$                   | 10.4118(4)          |
| $c/\text{\AA}$                   | 12.7879(7)          |
| $\alpha/^\circ$                  | $90^\circ$          |
| $\beta/^\circ$                   | $90^\circ$          |
| $\gamma/^\circ$                  | $90^\circ$          |
| Volume/ $\text{\AA}^3$           | 2051.73(18)         |
| Z                                | 4                   |
| $\rho_{\text{calc}}/\text{cm}^3$ | 1.280               |
| $\mu/\text{mm}^{-1}$             | 1.587               |
| F(000)                           | 840.0               |

|                                                |                                                                       |
|------------------------------------------------|-----------------------------------------------------------------------|
| Crystal size/mm <sup>3</sup>                   | ? × ? × ?                                                             |
| Radiation                                      | Cu K $\alpha$ ( $\lambda$ = 1.54184)                                  |
| 2 $\theta$ range for data collection/ $^\circ$ | 10.254 to 154.352                                                     |
| Index ranges                                   | -18 $\leq$ h $\leq$ 18, -12 $\leq$ k $\leq$ 12, -15 $\leq$ l $\leq$ 6 |
| Reflections collected                          | 7909                                                                  |
| Independent reflections                        | 2859 [ $R_{\text{int}}$ = 0.0459, $R_{\text{sigma}}$ = 0.0493]        |
| Data/restraints/parameters                     | 2859/1/258                                                            |
| Goodness-of-fit on $F^2$                       | 1.031                                                                 |
| Final R indexes [ $I \geq 2\sigma(I)$ ]        | $R_1$ = 0.0492, $wR_2$ = 0.1326                                       |
| Final R indexes [all data]                     | $R_1$ = 0.0536, $wR_2$ = 0.1383                                       |
| Largest diff. peak/hole / e $\text{\AA}^{-3}$  | 0.34/-0.33                                                            |

To grow the crystals used to collect the X-ray data for **2i**, the following method was used: the sample was dissolved with 3 mL petroleum ether and 1 mL CH<sub>2</sub>Cl<sub>2</sub> in a small vial, which was kept aside at room temperature to obtain crystals.

A suitable crystal was selected on a ROD, Synergy Custom system, HyPix diffractometer. The crystal was kept at 296.6 K during data collection. Using Olex2, the structure was solved with the ShelXT structure solution program using Intrinsic Phasing and refined with the ShelXL refinement package using Least Squares minimisation. The data have been deposited at the Cambridge Crystallographic Data Center (CCDC 2257688).

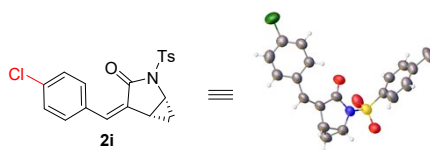

**Figure S3.** The X-ray Diffraction Configuration of (*R,R*)-**2i**.

*Table S8.* Crystallographic data for compounds **2i**

|                        |                                                     |
|------------------------|-----------------------------------------------------|
| Identification code    | <b>2i</b>                                           |
| Empirical formula      | C <sub>19</sub> H <sub>16</sub> ClNO <sub>3</sub> S |
| Formula weight         | 373.85                                              |
| Temperature/K          | 296.6                                               |
| Crystal system         | triclinic                                           |
| Space group            | P1                                                  |
| a/ $\text{\AA}$        | 6.7397(2)                                           |
| b/ $\text{\AA}$        | 8.1678(2)                                           |
| c/ $\text{\AA}$        | 16.0806(3)                                          |
| $\alpha$ / $^\circ$    | 93.714(2)                                           |
| $\beta$ / $^\circ$     | 95.548(2)                                           |
| $\gamma$ / $^\circ$    | 96.111(2)                                           |
| Volume/ $\text{\AA}^3$ | 873.54(4)                                           |
| Z                      | 1                                                   |

|                                                |                                                               |
|------------------------------------------------|---------------------------------------------------------------|
| $\rho_{\text{calc}}/\text{cm}^3$               | 1.416                                                         |
| $\mu/\text{mm}^{-1}$                           | 3.208                                                         |
| F(000)                                         | 385.0                                                         |
| Crystal size/ $\text{mm}^3$                    | ? $\times$ ? $\times$ ?                                       |
| Radiation                                      | Cu K $\alpha$ ( $\lambda = 1.54184$ )                         |
| 2 $\theta$ range for data collection/ $^\circ$ | 10.926 to 155.292                                             |
| Index ranges                                   | $-8 \leq h \leq 8, -10 \leq k \leq 10, -20 \leq l \leq 19$    |
| Reflections collected                          | 23126                                                         |
| Independent reflections                        | 6332 [ $R_{\text{int}} = 0.0338, R_{\text{sigma}} = 0.0341$ ] |
| Data/restraints/parameters                     | 6332/3/453                                                    |
| Goodness-of-fit on $F^2$                       | 1.028                                                         |
| Final R indexes [ $I \geq 2\sigma(I)$ ]        | $R_1 = 0.0592, wR_2 = 0.1586$                                 |
| Final R indexes [all data]                     | $R_1 = 0.0731, wR_2 = 0.1723$                                 |
| Largest diff. peak/hole / $e \text{ \AA}^{-3}$ | 0.32/-0.32                                                    |

## 8 References

- [1] Chen, L.; Li, Y.; Han, M.; Peng, Y.; Chen, X.; Xiang, S.; Gao, H.; Lu, T.; Luo, S.-P.; Zhou, B.; Wu, H.; Yang, Y.-F.; Liu, Y. *P/N-Heteroleptic Cu(I)-Photosensitizer-Catalyzed [3 + 2] Regiospecific Annulation of Aminocyclopropanes and Functionalized Alkynes*. *J. Org. Chem.* **2022**, *87*, 15571–15581.
- [2] Gu, J.; Hong, B.; Xue, X.; Xi, J.; Gu, Z. *Synthesis of Atropisomers with Biaryl and Vinylaryl Chirality via Pd-Catalyzed Point-to-Axial Chirality Transfer Ring-Opening Reaction*. *Org. Lett.* **2022**, *24*, 9097–9101.
- [3] Nogami, M.; Hirano, K.; Morimoto, K.; Tanioka, M.; Miyamoto, K.; Muranaka, A.; Uchiyama, M. *Alkynylboration Reaction Leading to Boron-containing  $\pi$ -Extended cis-Stilbenes as a Highly Tunable Fluorophore*. *Org. Lett.* **2019**, *21*, 3392–3395.
- [4] Wang, S.-Y.; Mao, W.-W.; She, Z.-G.; Li, C.-R.; Yang, D.-Q.; Lin, Y.-C. Fu, L.-W. *Synthesis and biological evaluation of 12 allenic aromatic ethers*. *Bioorganic & Medicinal Chemistry Letters*, **2007**, *17*, 2785-2788.

## 9 Copies of NMR Spectra for Compounds

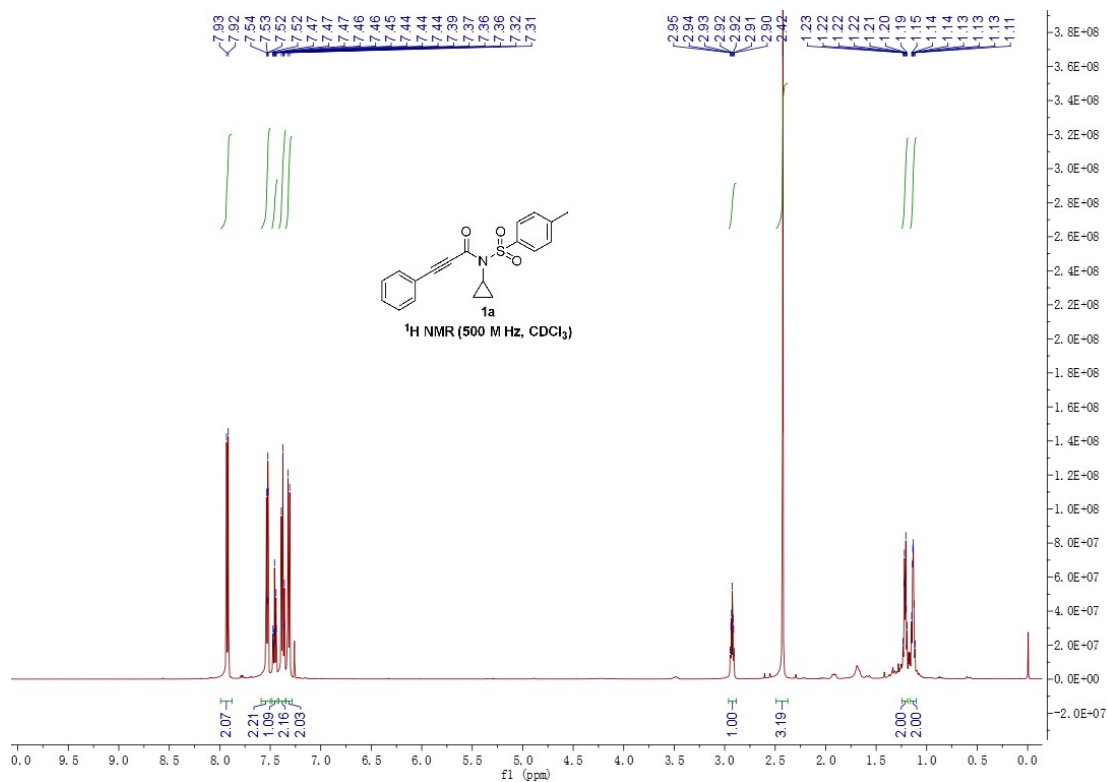

Figure S4. <sup>1</sup>H NMR (500 MHz, CDCl<sub>3</sub>) spectrum of 1a

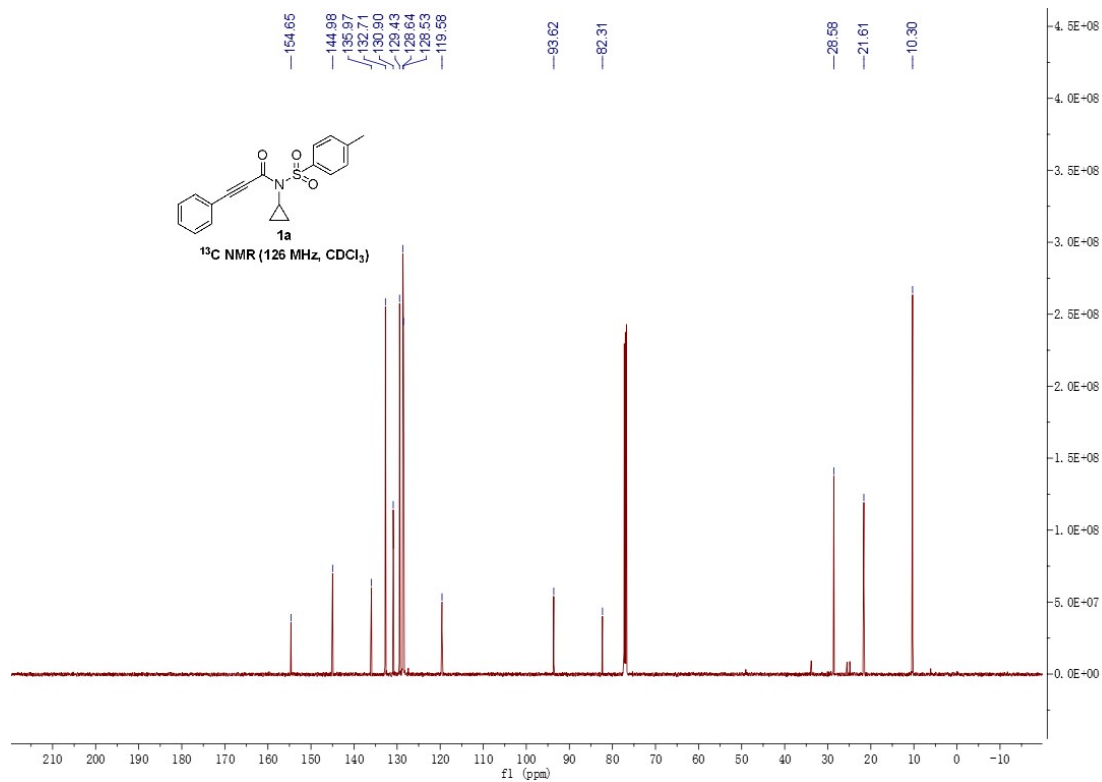

Figure S5. <sup>13</sup>C NMR (126 MHz, CDCl<sub>3</sub>) spectrum of 1a

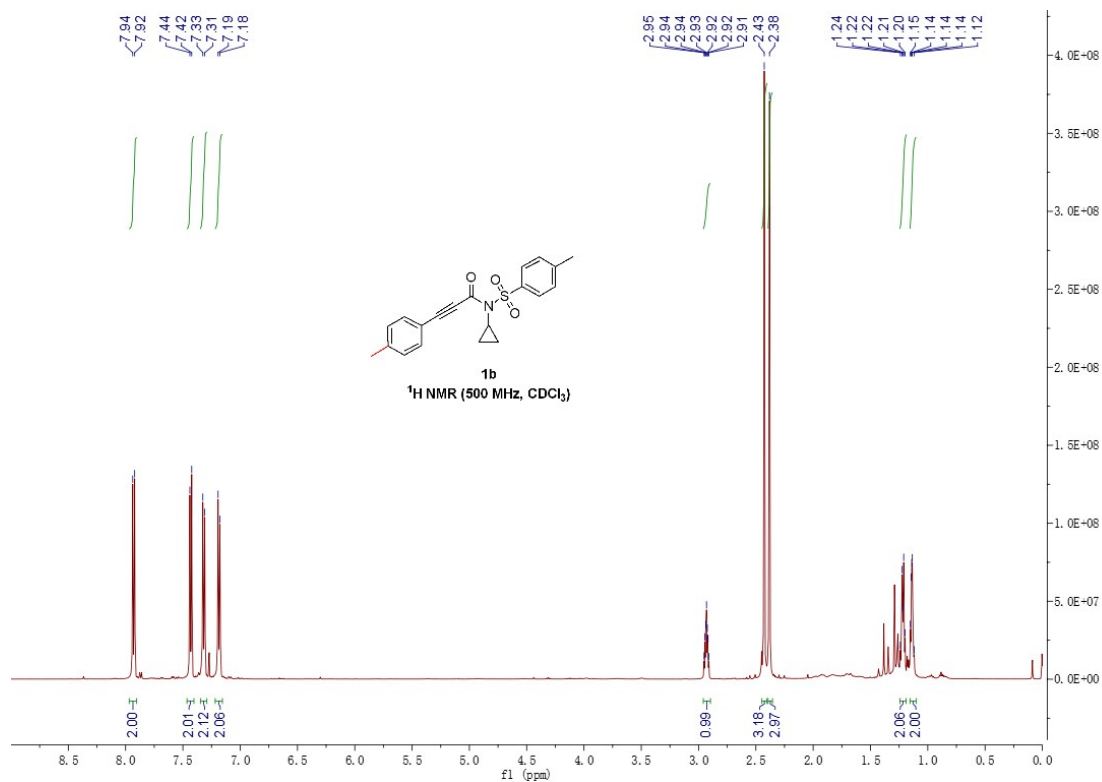

Figure S6. <sup>1</sup>H NMR (500 MHz, CDCl<sub>3</sub>) spectrum of 1b

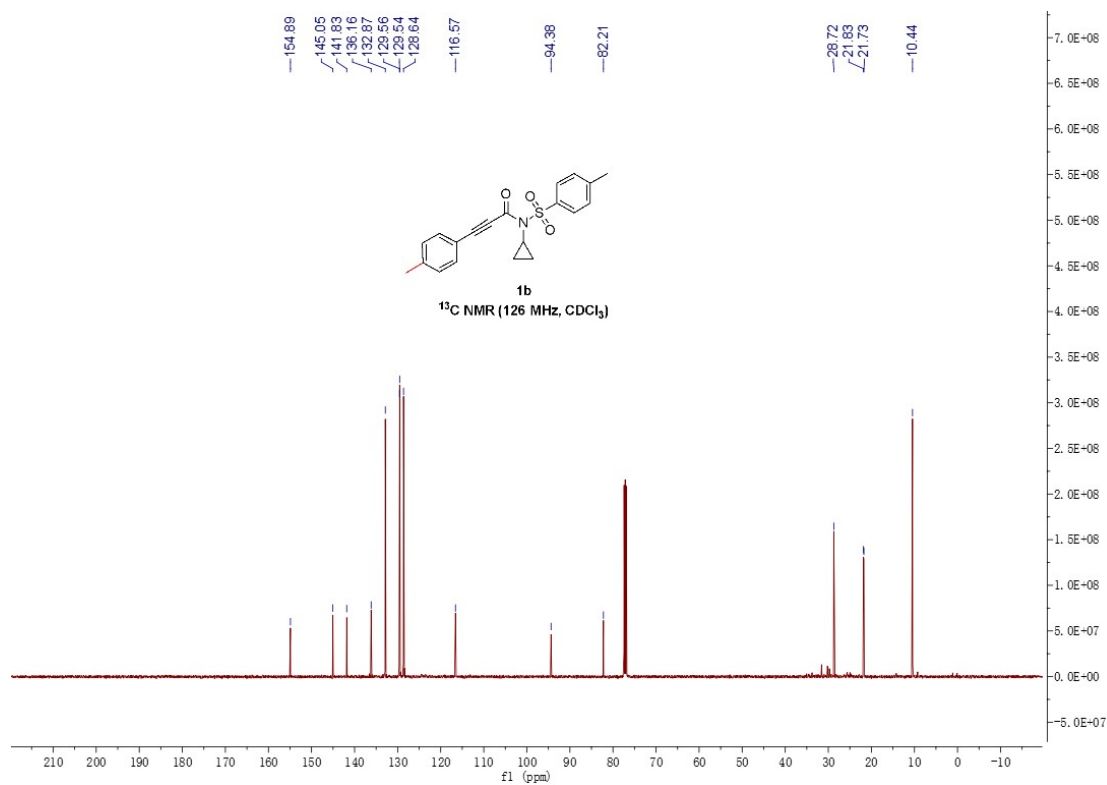

Figure S7. <sup>13</sup>C NMR (126 MHz, CDCl<sub>3</sub>) spectrum of 1b

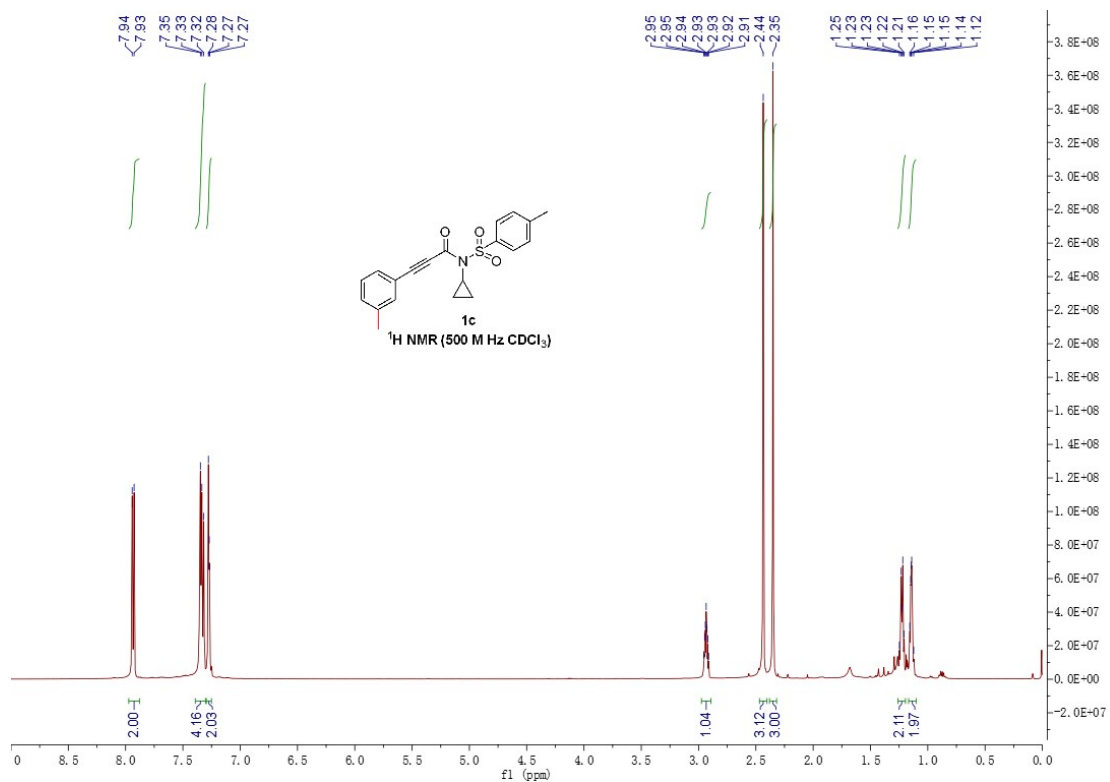

Figure S8. <sup>1</sup>H NMR (500 MHz, CDCl<sub>3</sub>) spectrum of 1c

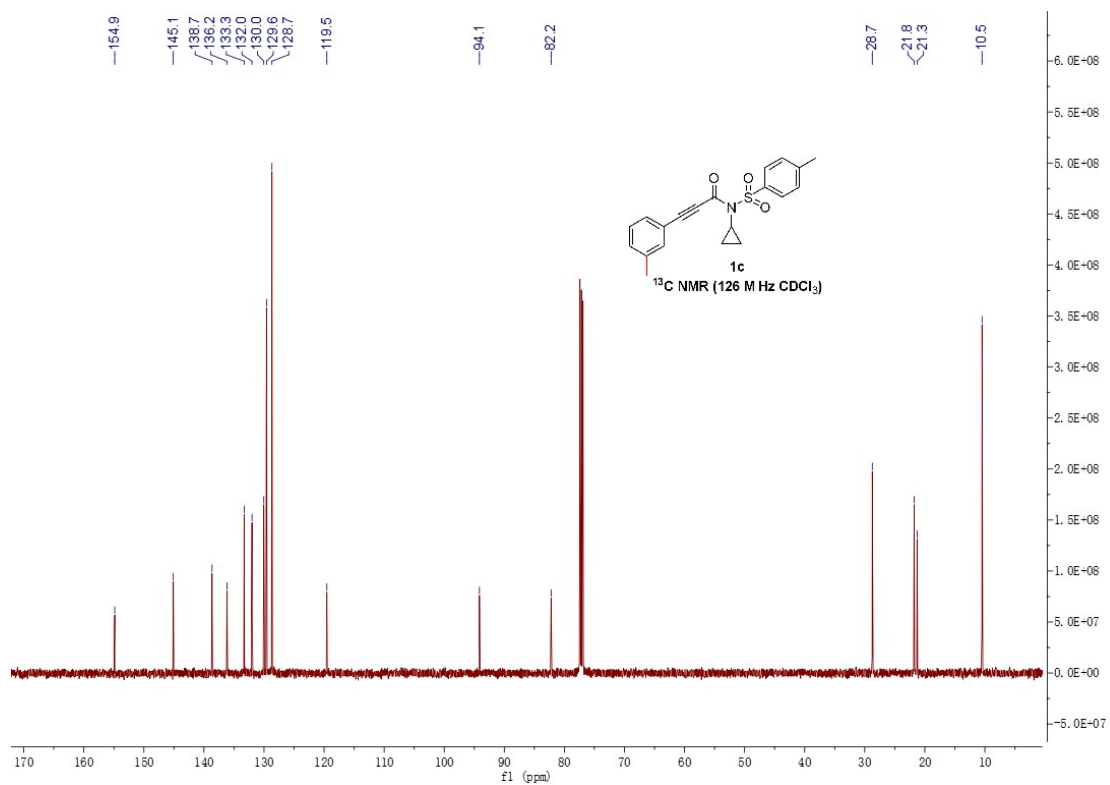

Figure S9. <sup>13</sup>C NMR (126 MHz, CDCl<sub>3</sub>) spectrum of 1c

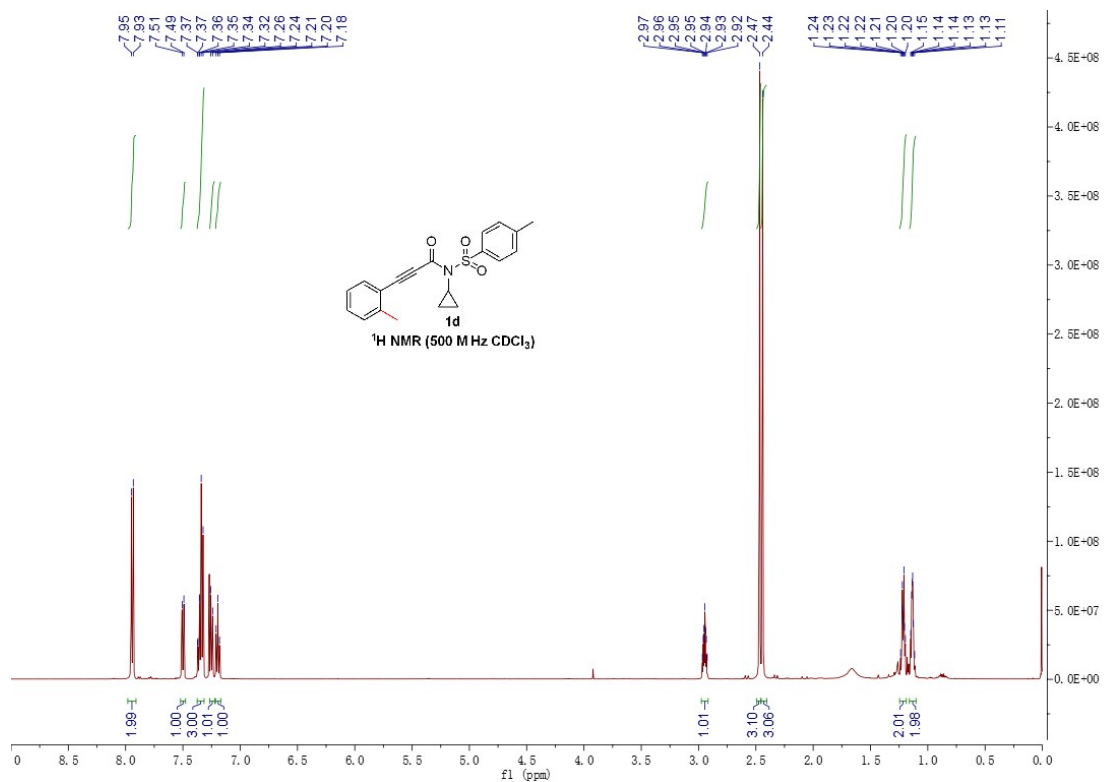

Figure S10. <sup>1</sup>H NMR (500 MHz, CDCl<sub>3</sub>) spectrum of **1d**

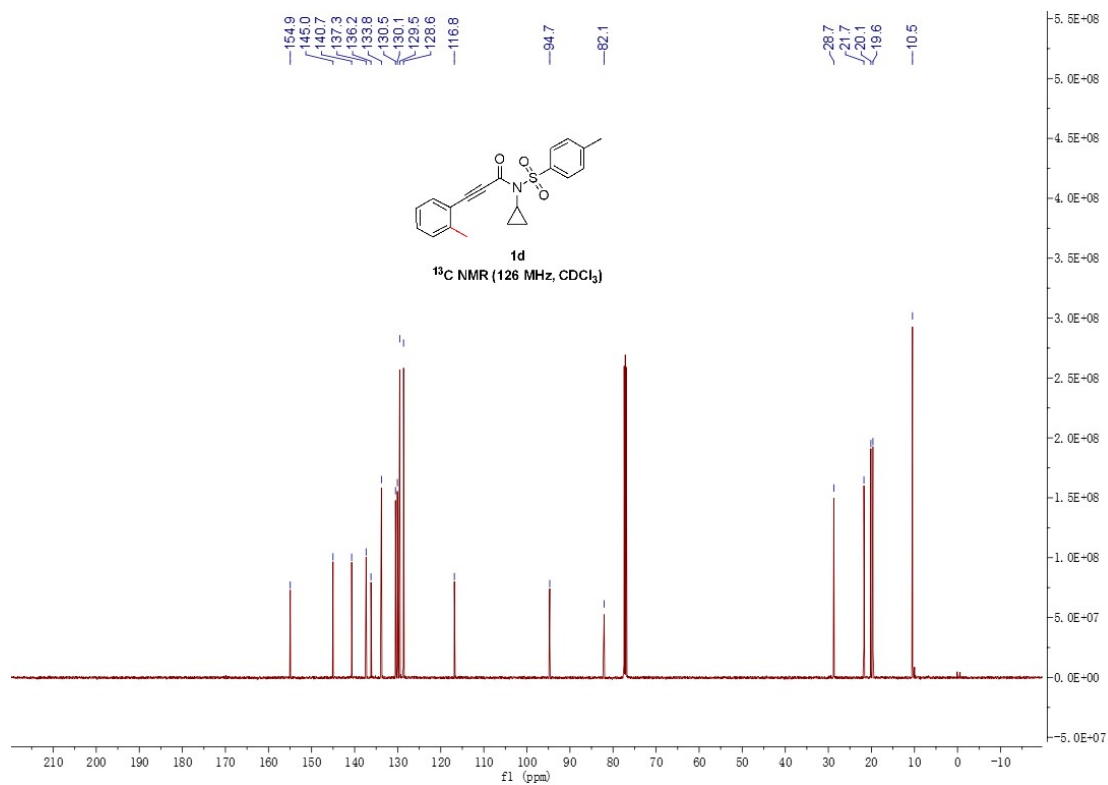

Figure S11. <sup>13</sup>C NMR (126 MHz, CDCl<sub>3</sub>) spectrum of **1d**

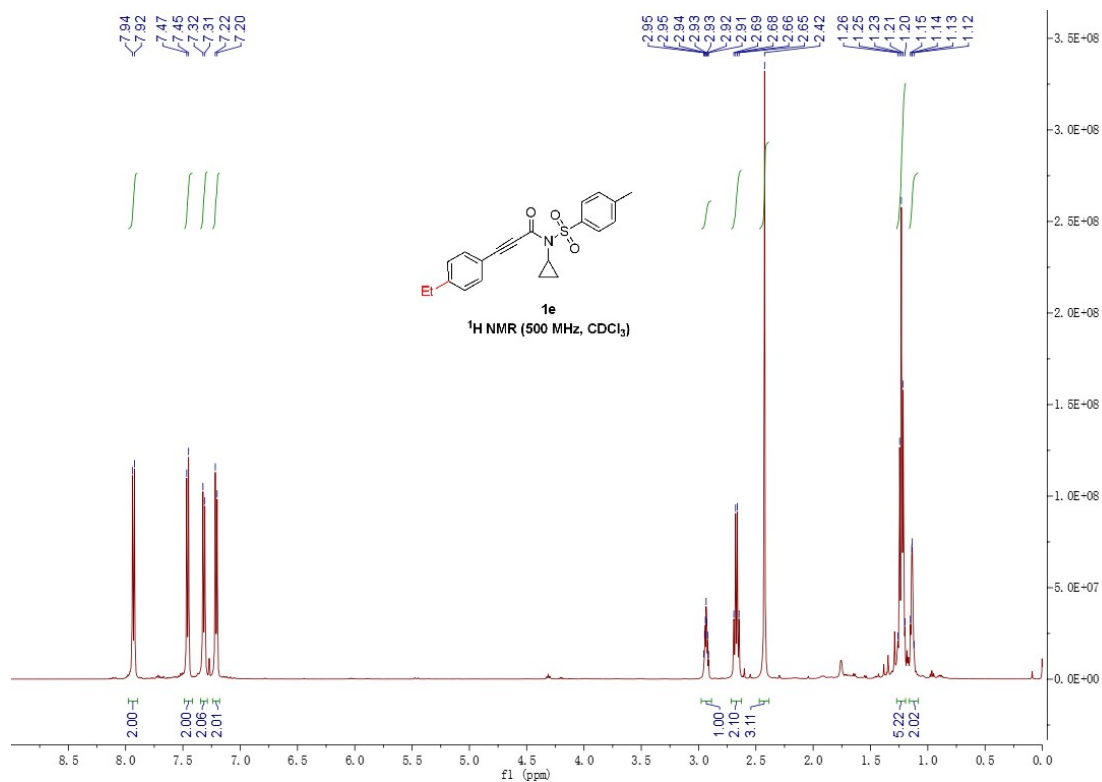

Figure S12. <sup>1</sup>H NMR (500 MHz, CDCl<sub>3</sub>) spectrum of 1e

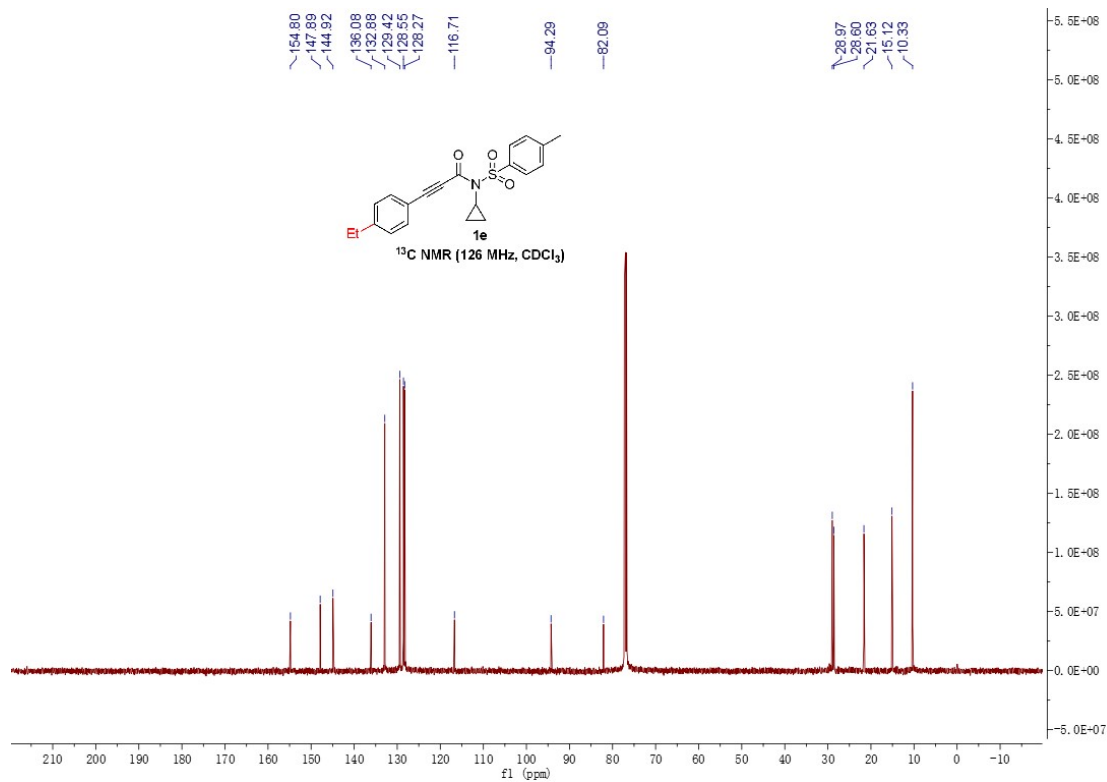

Figure S13. <sup>13</sup>C NMR (126 MHz, CDCl<sub>3</sub>) spectrum of 1e



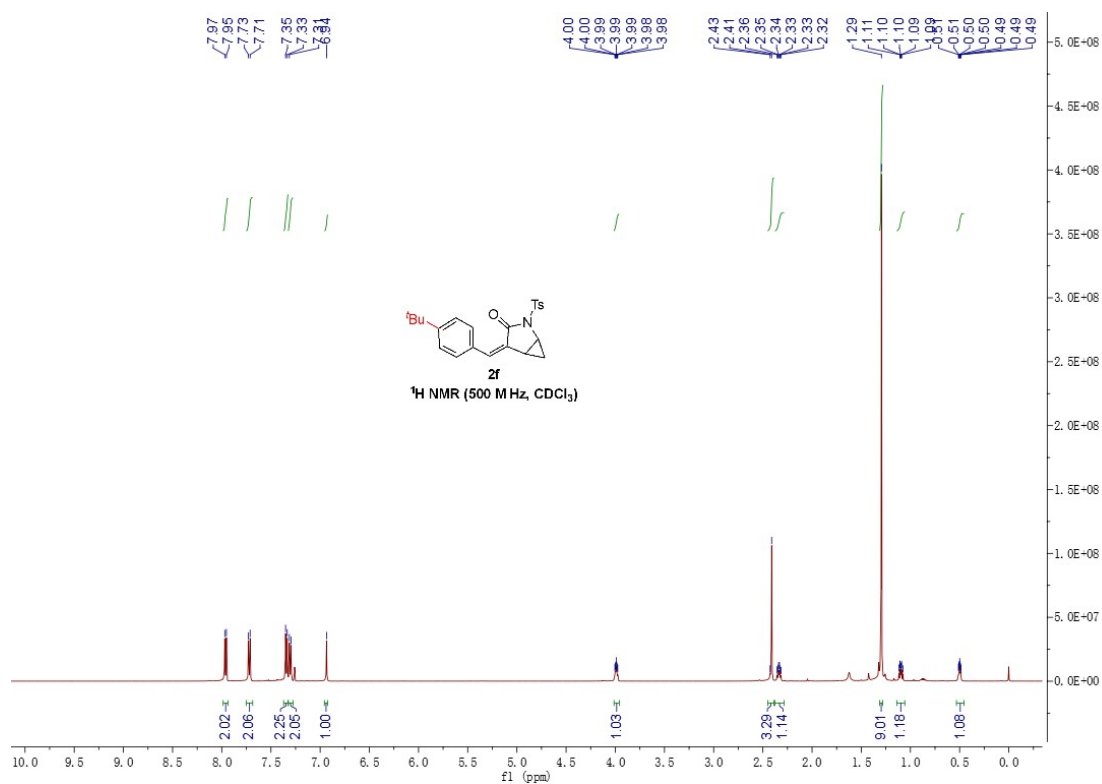

Figure S14. <sup>1</sup>H NMR (500 MHz, CDCl<sub>3</sub>) spectrum of 1f

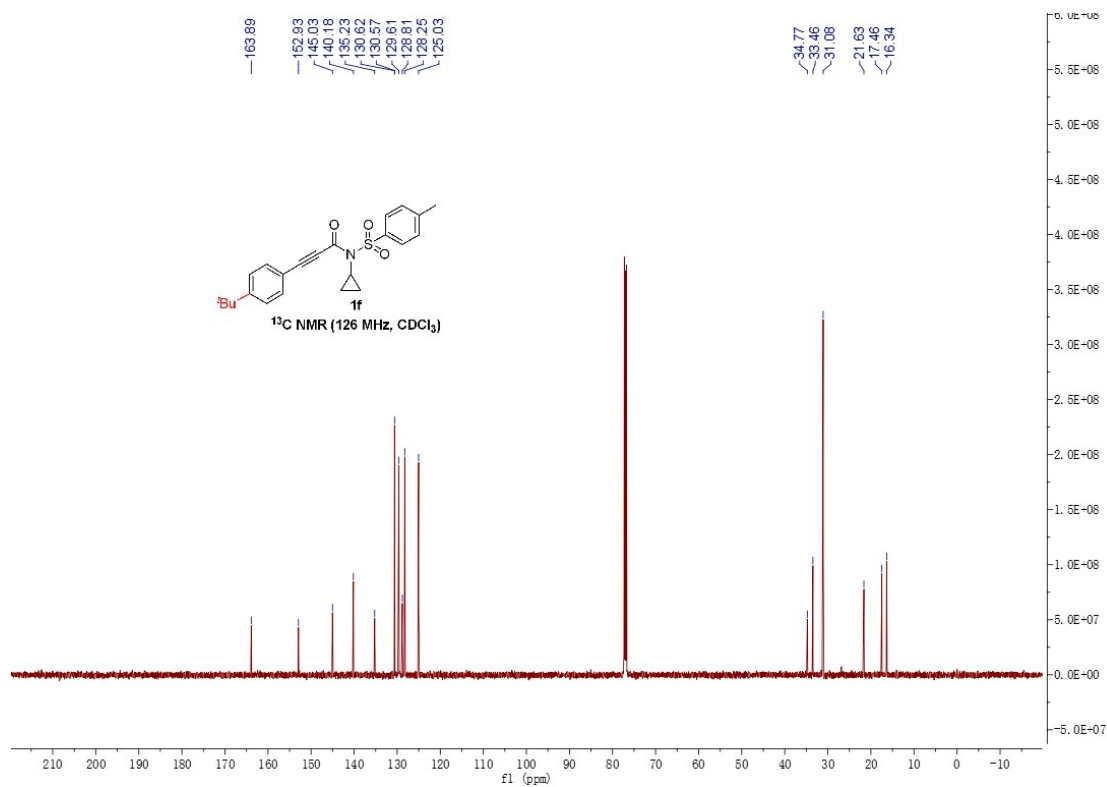

Figure S15. <sup>13</sup>C NMR (126 MHz, CDCl<sub>3</sub>) spectrum of 1f

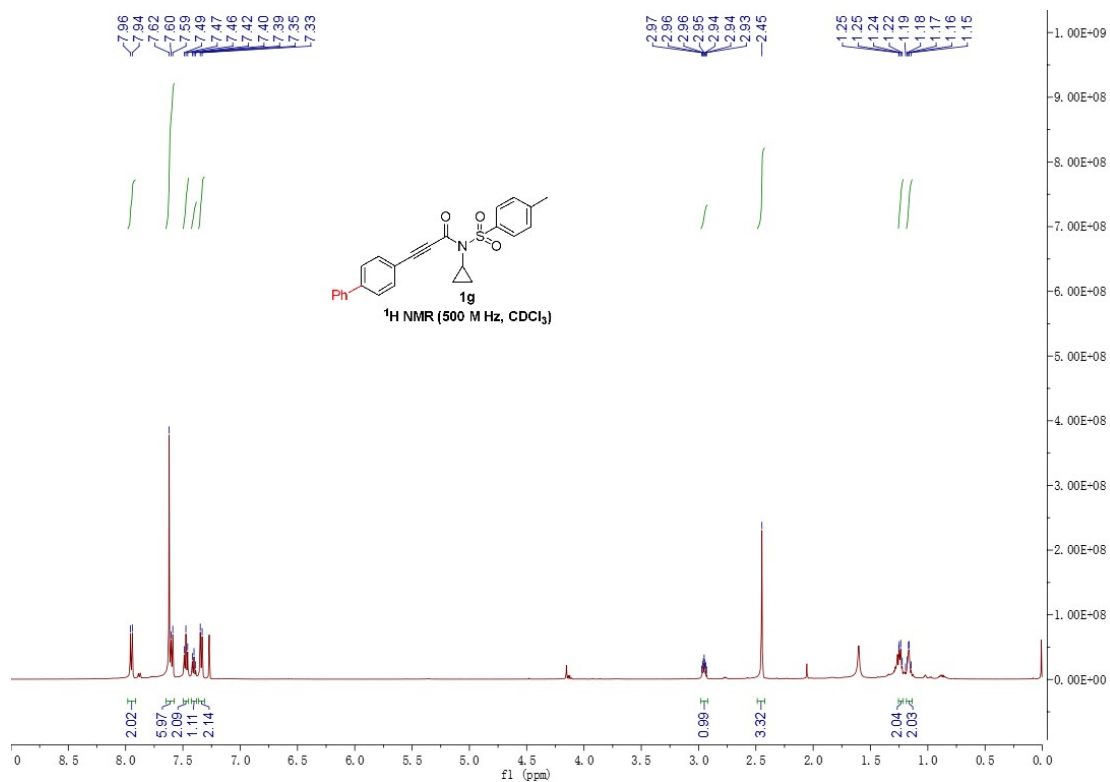

Figure S16. <sup>1</sup>H NMR (500 MHz, CDCl<sub>3</sub>) spectrum of 1g

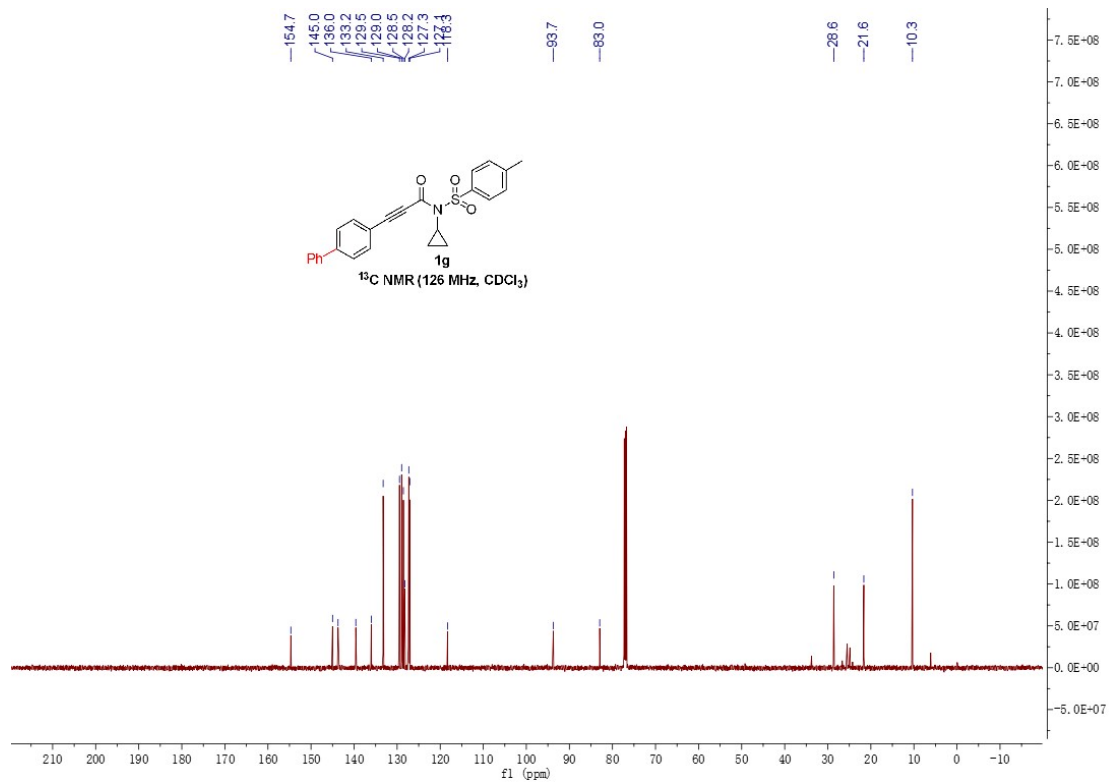

Figure S17. <sup>13</sup>C NMR (126 MHz, CDCl<sub>3</sub>) spectrum of 1g

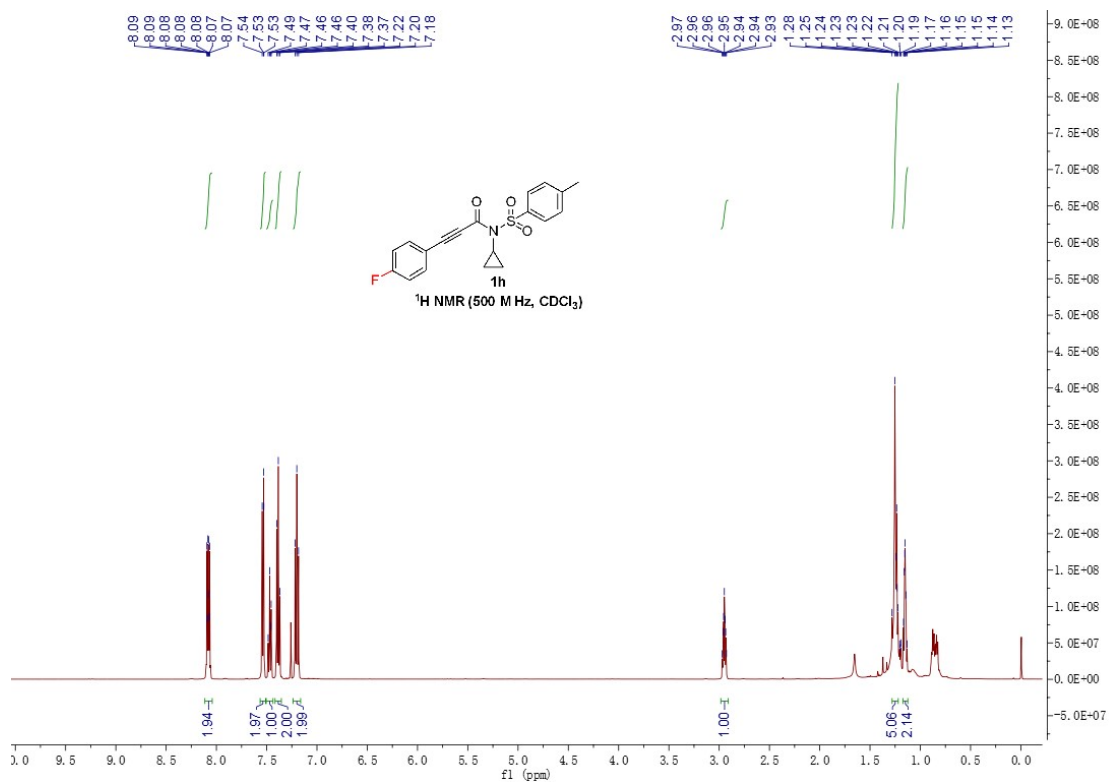

Figure S18. <sup>1</sup>H NMR (500 MHz, CDCl<sub>3</sub>) spectrum of 1h

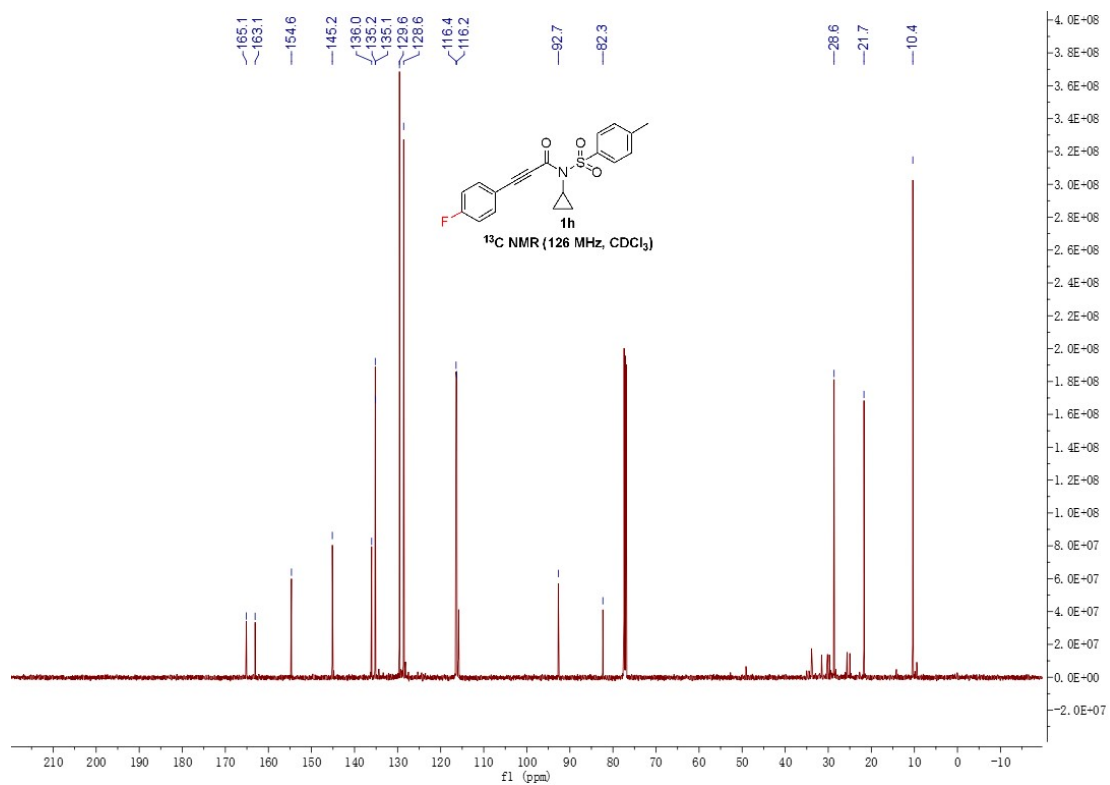

Figure S19. <sup>13</sup>C NMR (126 MHz, CDCl<sub>3</sub>) spectrum of 1h

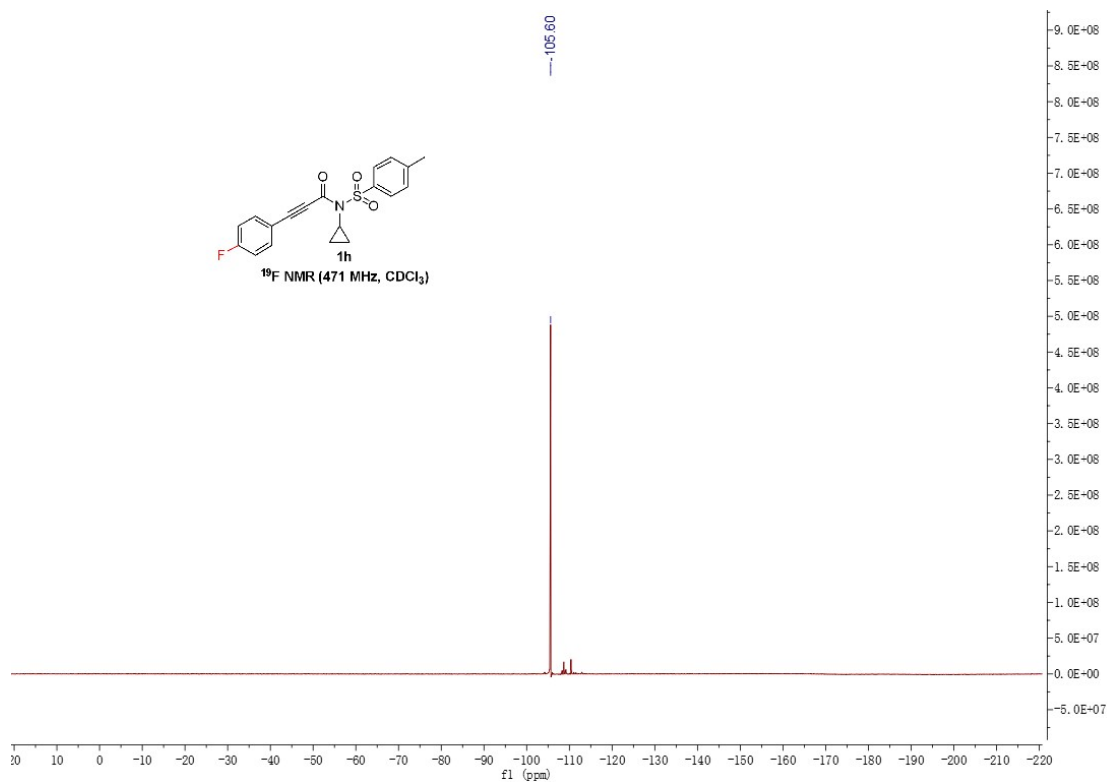

Figure S20. <sup>19</sup>F NMR (471 MHz, CDCl<sub>3</sub>) spectrum of **1h**

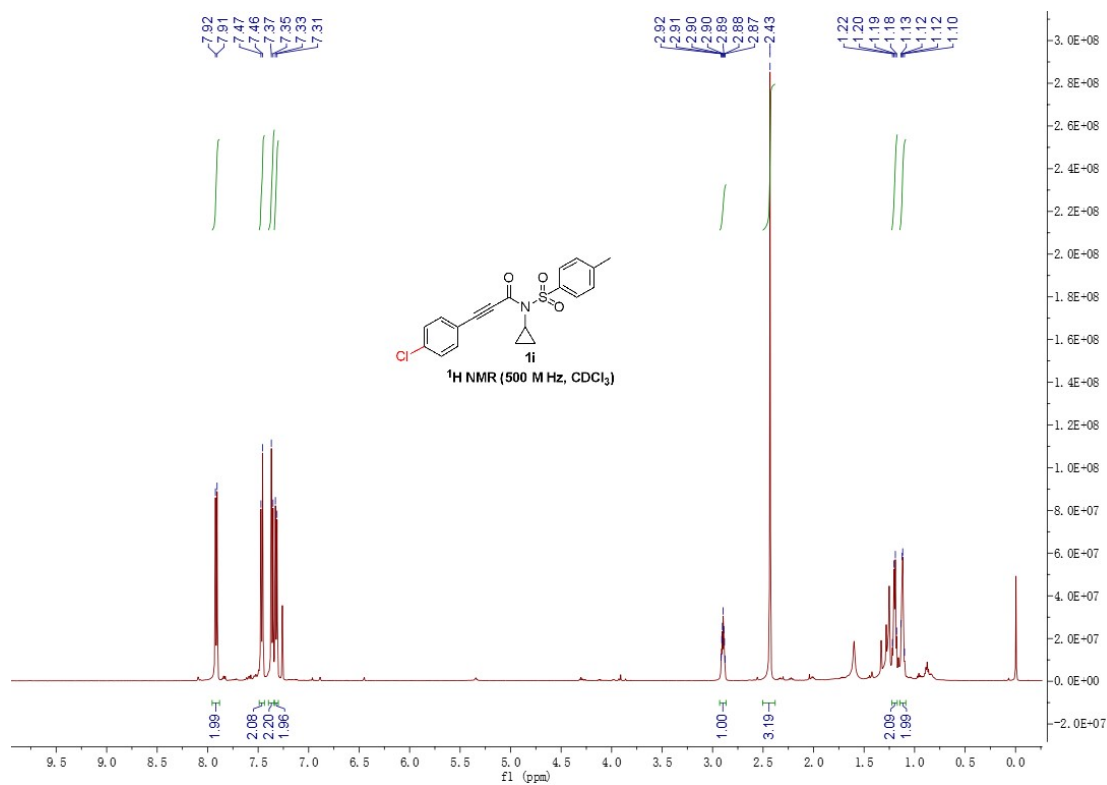

Figure S21. <sup>1</sup>H NMR (500 MHz, CDCl<sub>3</sub>) spectrum of **1i**

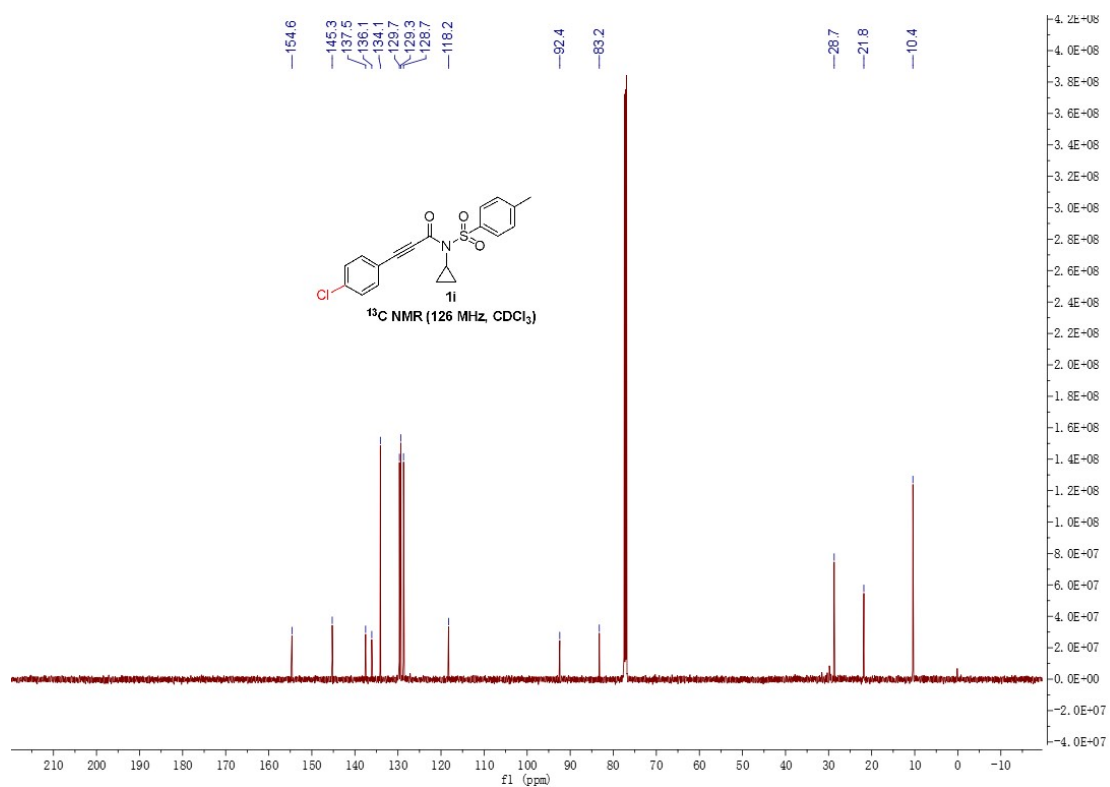

Figure S22. <sup>13</sup>C NMR (126 MHz, CDCl<sub>3</sub>) spectrum of 1i

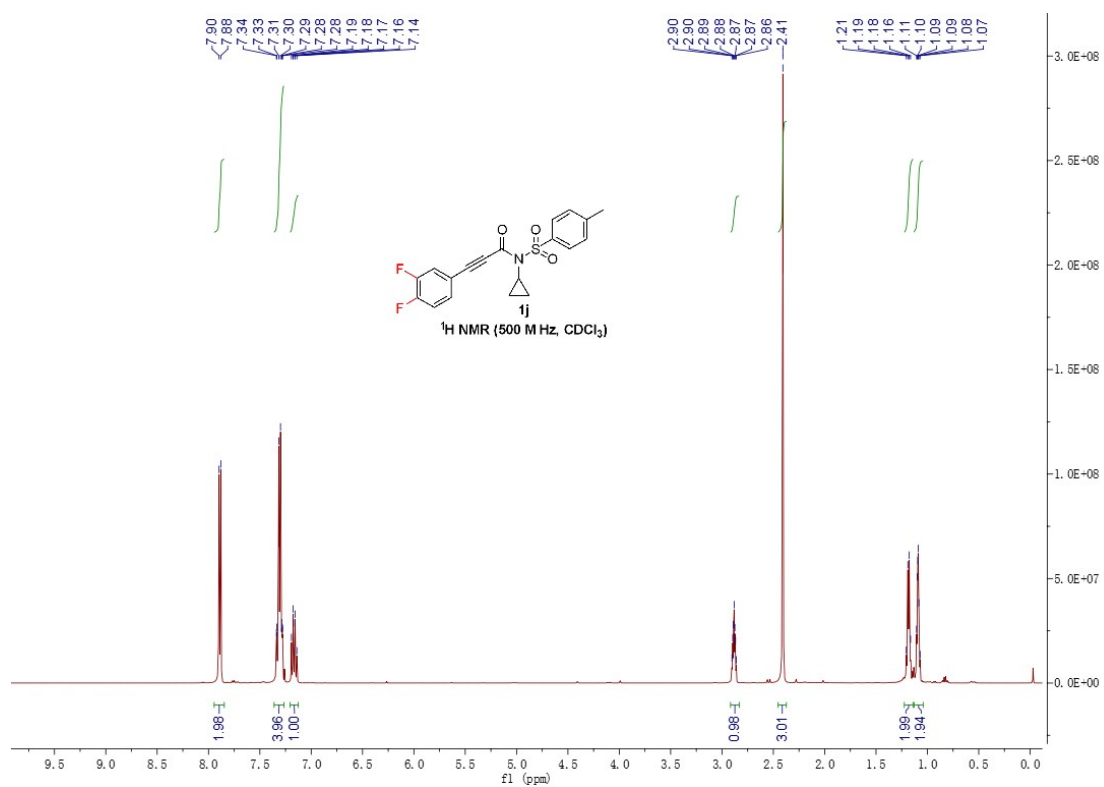

Figure S23. <sup>1</sup>H NMR (500 MHz, CDCl<sub>3</sub>) spectrum of 1j

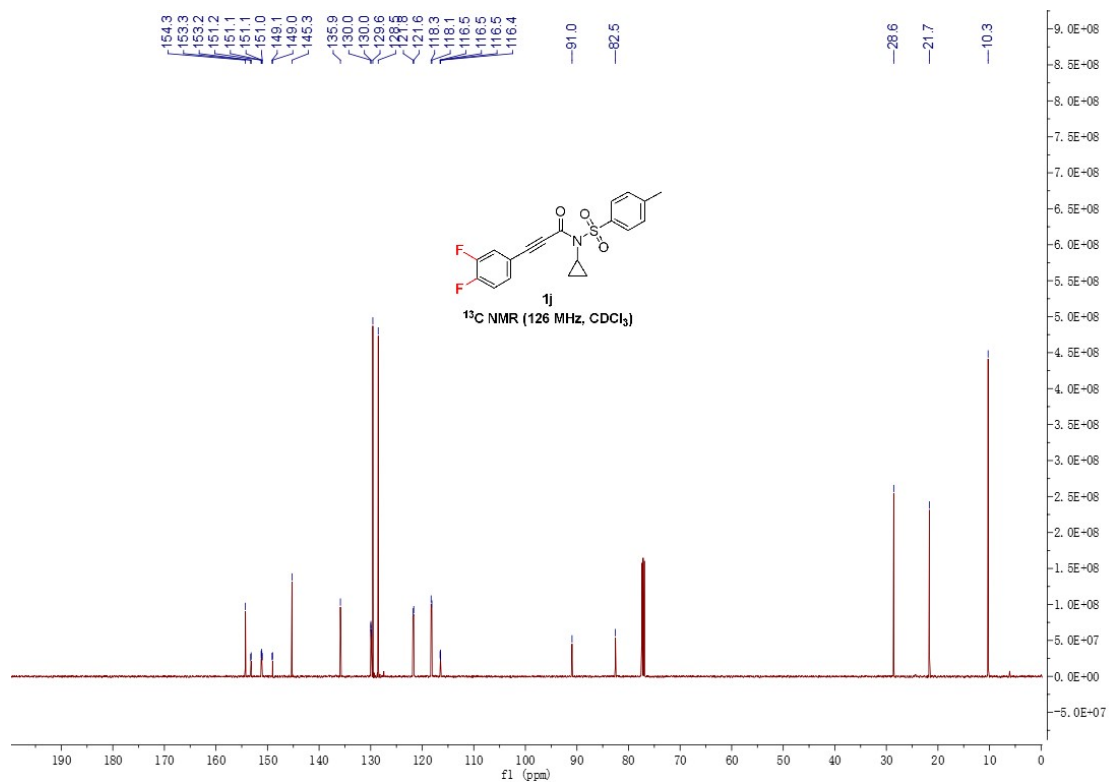

Figure S24.  $^{13}\text{C}$  NMR (126 MHz,  $\text{CDCl}_3$ ) spectrum of **1j**

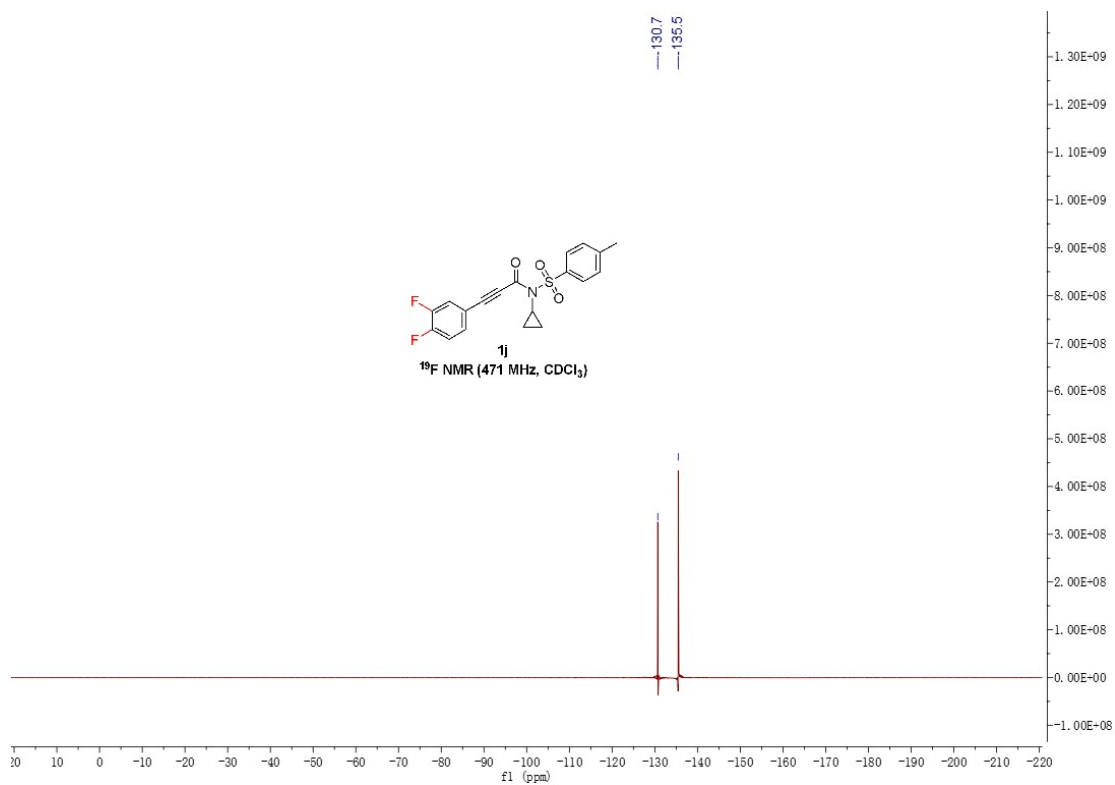

Figure S25.  $^{19}\text{F}$  NMR (471 MHz,  $\text{CDCl}_3$ ) spectrum of **1j**

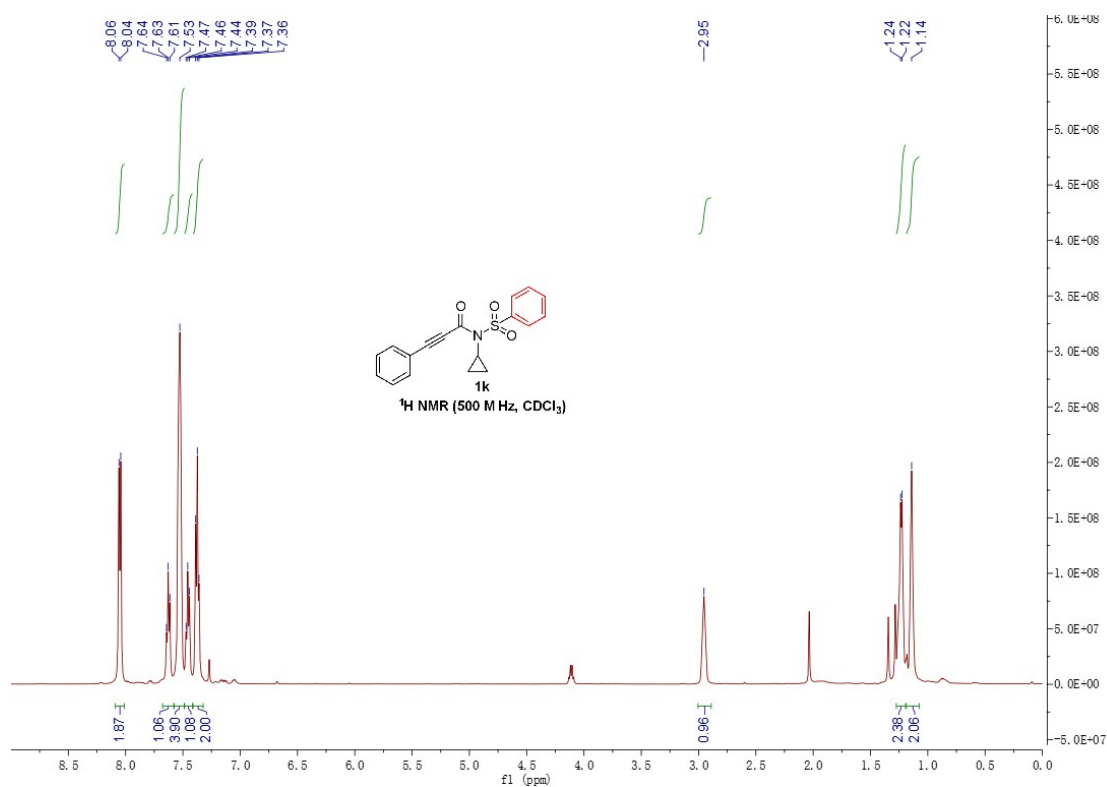

Figure S26.  $^1\text{H NMR}$  (500 MHz,  $\text{CDCl}_3$ ) spectrum of 1k

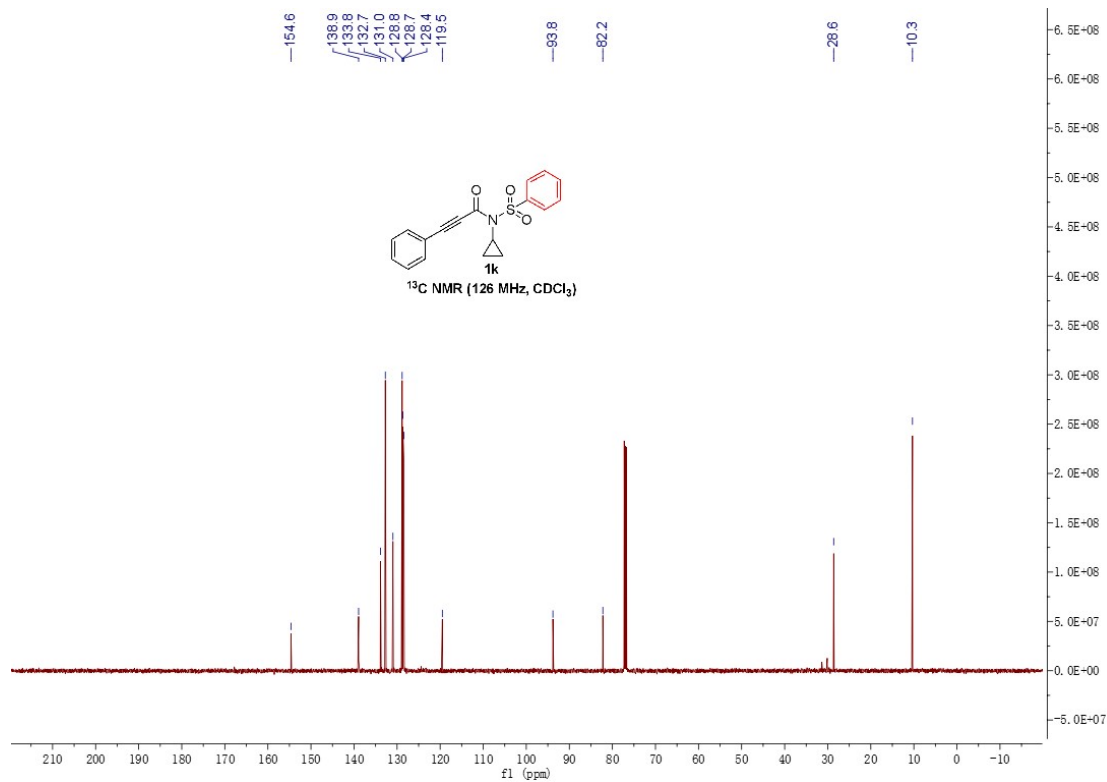

Figure S27.  $^{13}\text{C NMR}$  (126 MHz,  $\text{CDCl}_3$ ) spectrum of 1k

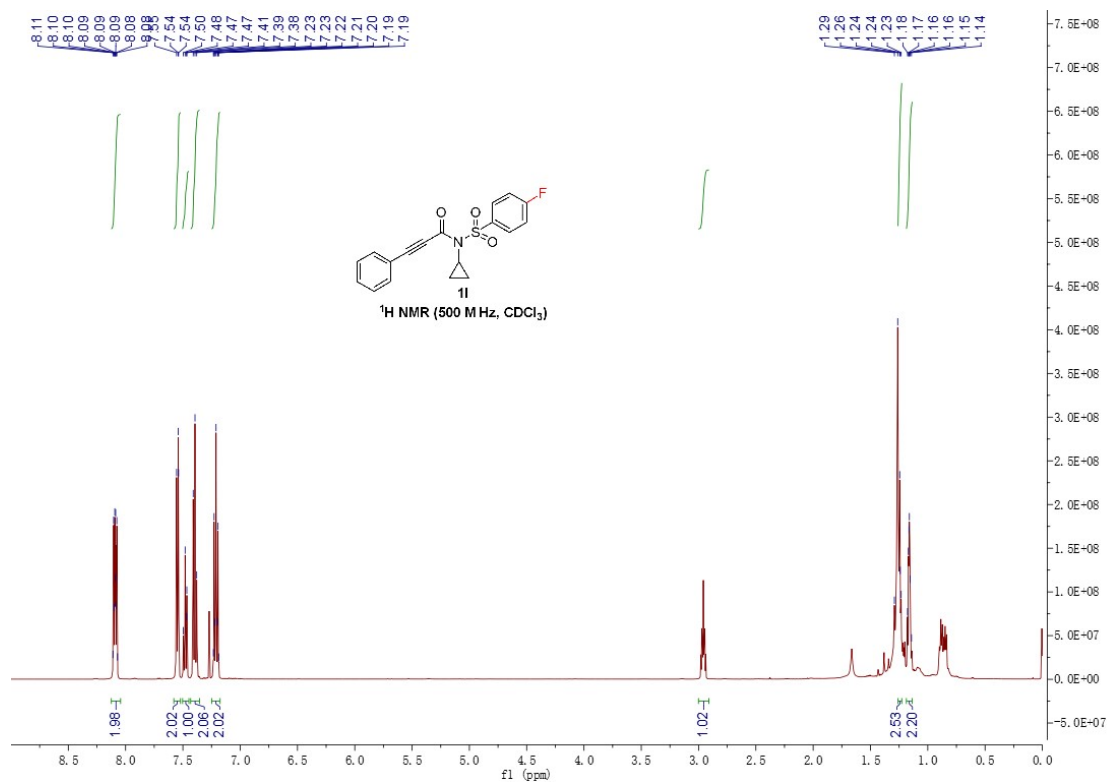

Figure S28. <sup>1</sup>H NMR (500 MHz, CDCl<sub>3</sub>) spectrum of 11

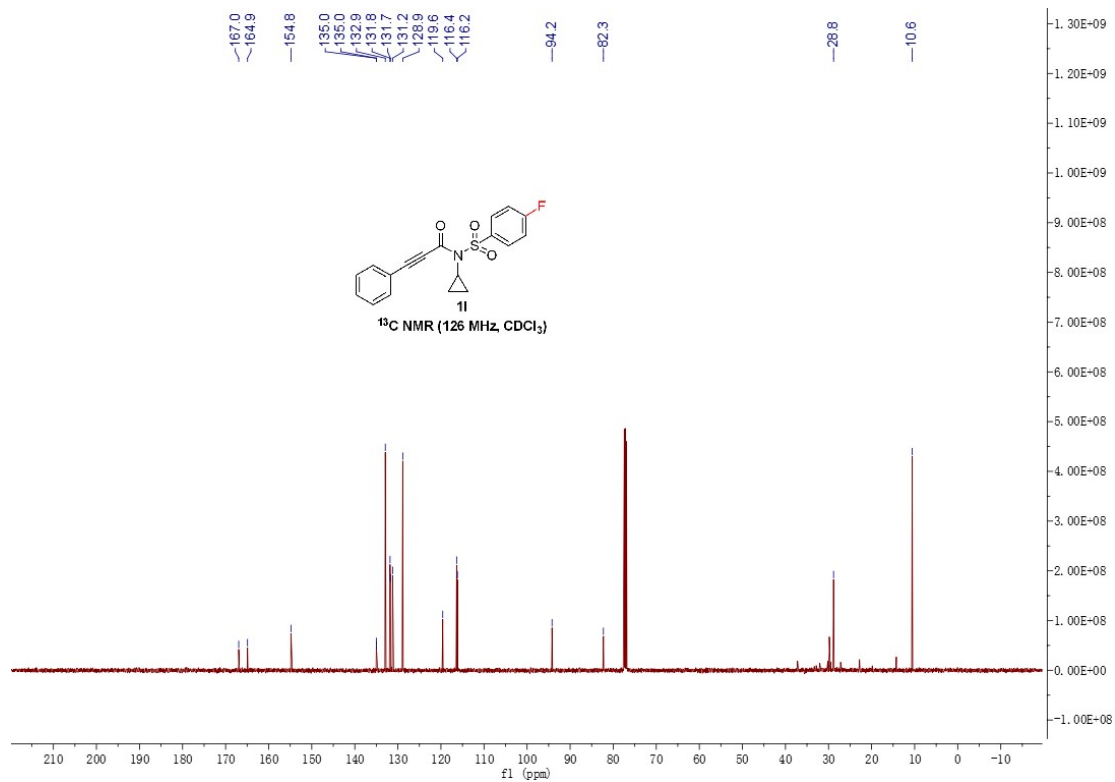

Figure S29. <sup>13</sup>C NMR (126 MHz, CDCl<sub>3</sub>) spectrum of 11





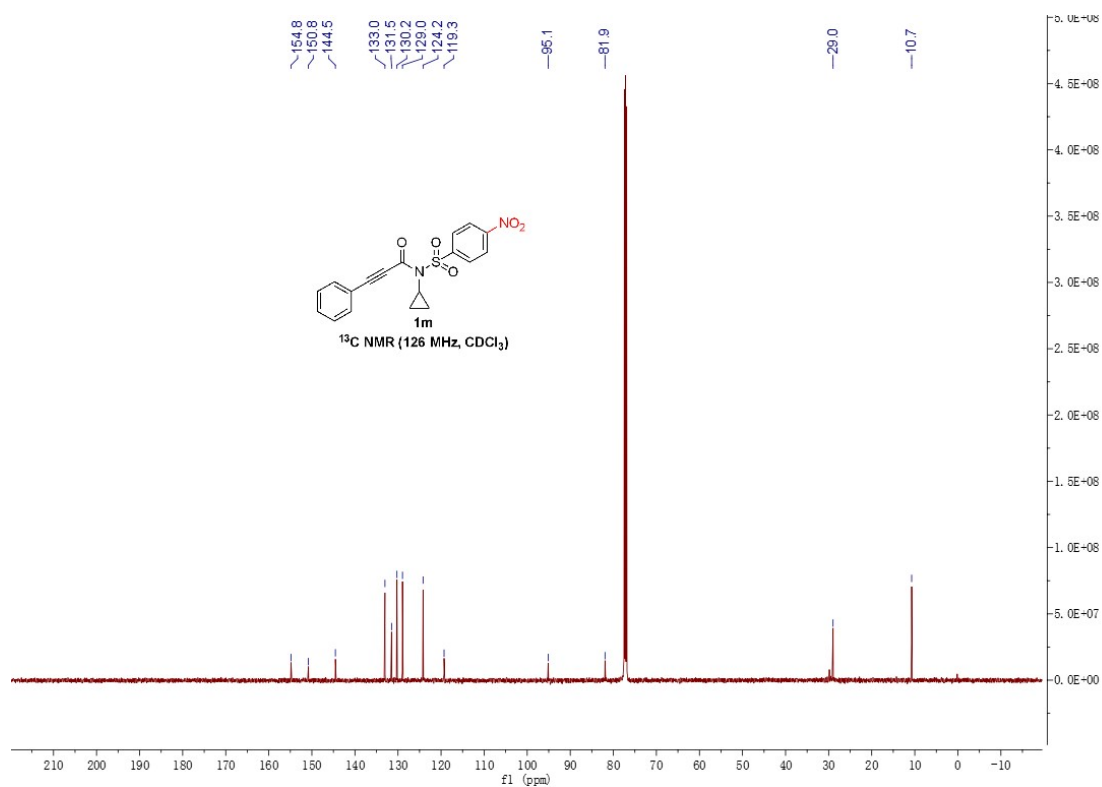

Figure S32. <sup>13</sup>C NMR (126 MHz, CDCl<sub>3</sub>) spectrum of **1m**

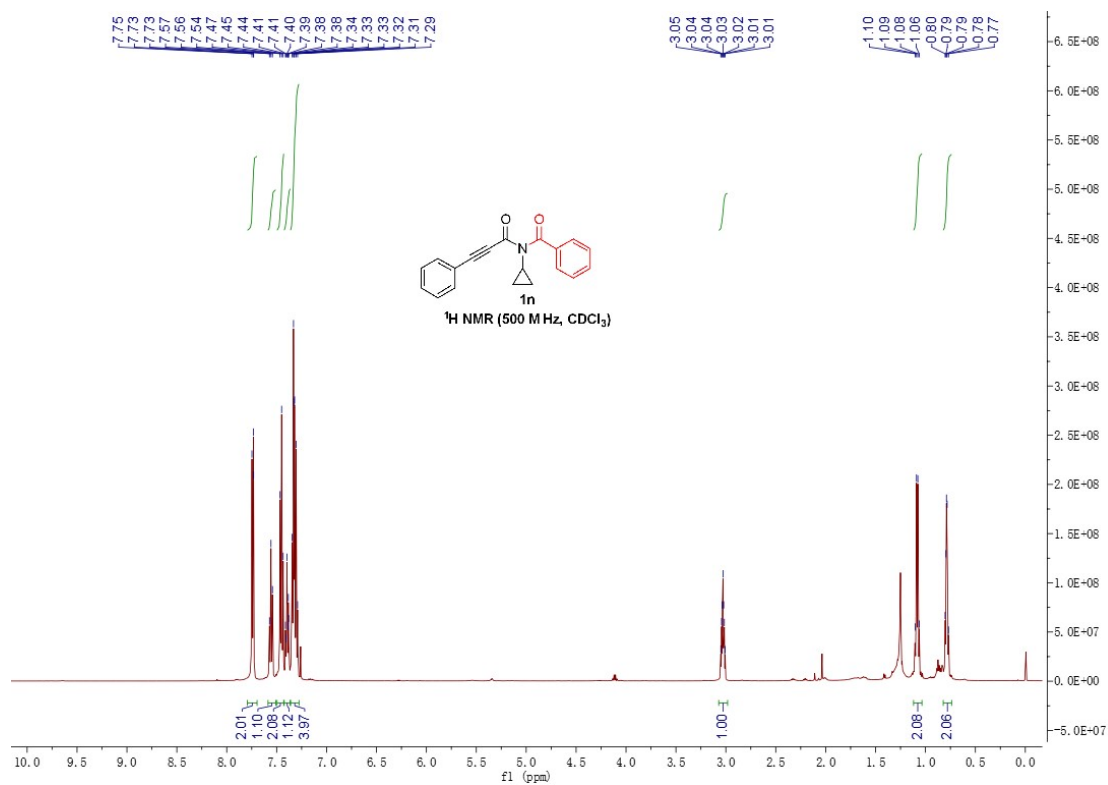

Figure S33. <sup>1</sup>H NMR (500 MHz, CDCl<sub>3</sub>) spectrum of **1n**

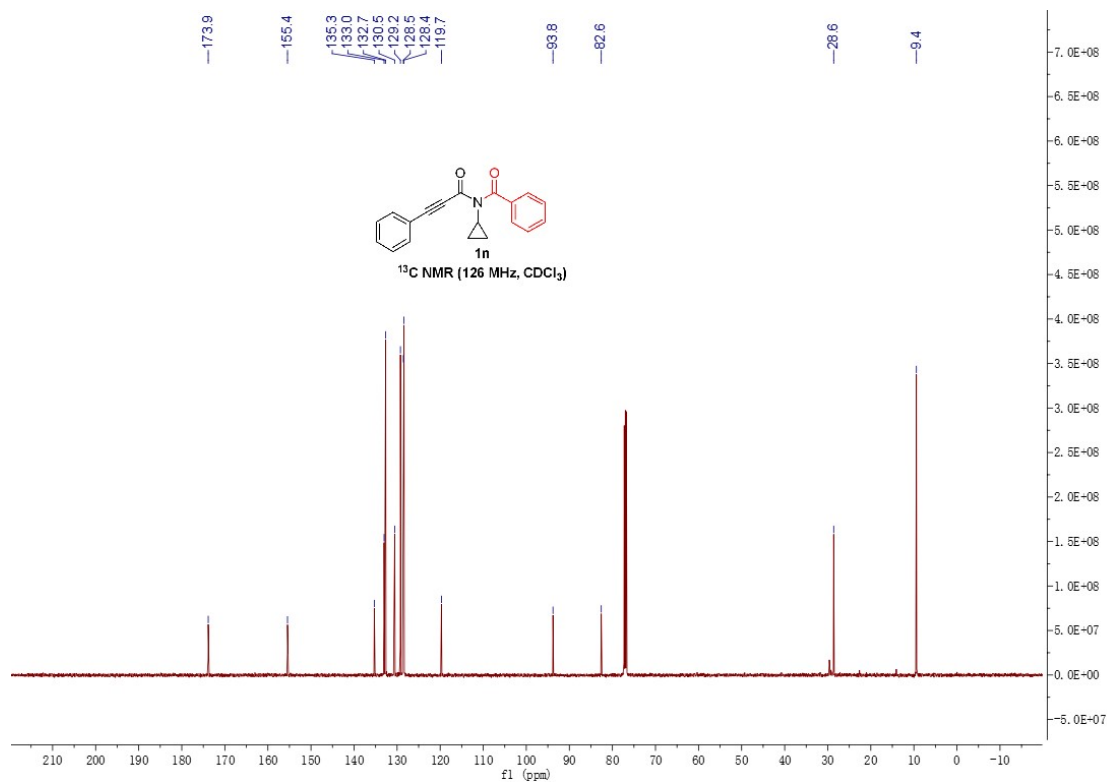

Figure S34.  $^{13}\text{C}$  NMR (126 MHz,  $\text{CDCl}_3$ ) spectrum of **1n**

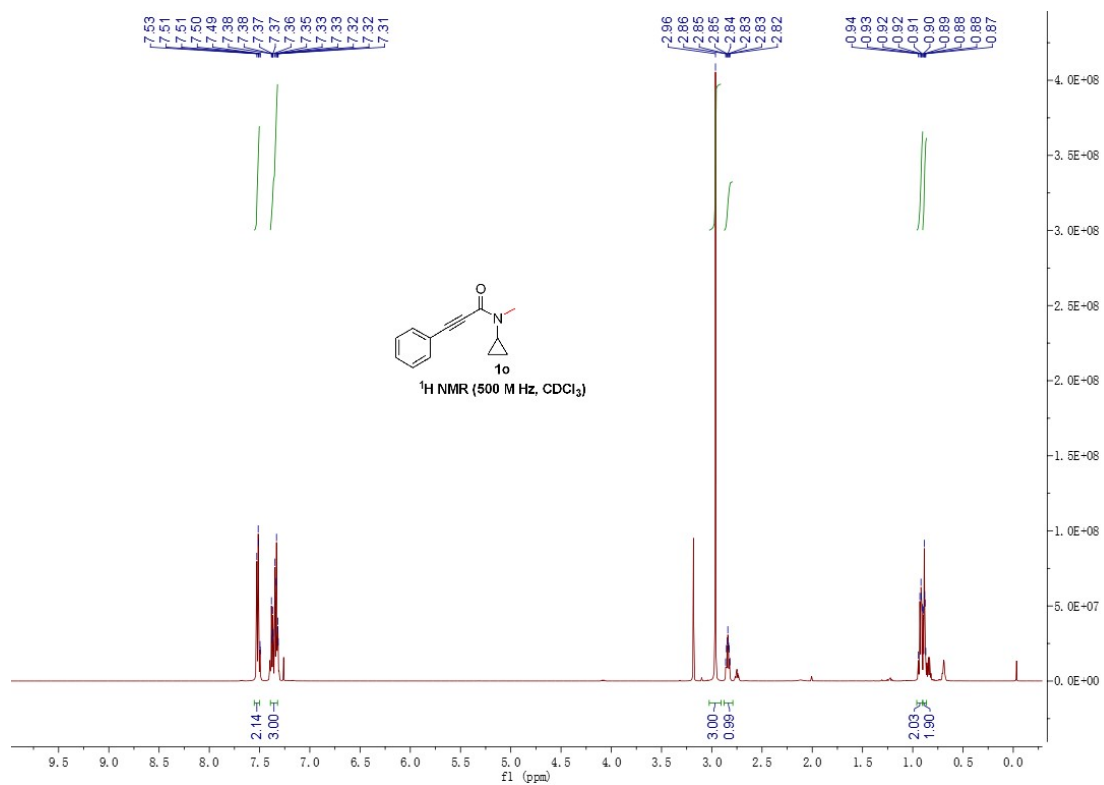

Figure S35.  $^1\text{H}$  NMR (500 MHz,  $\text{CDCl}_3$ ) spectrum of **1o**

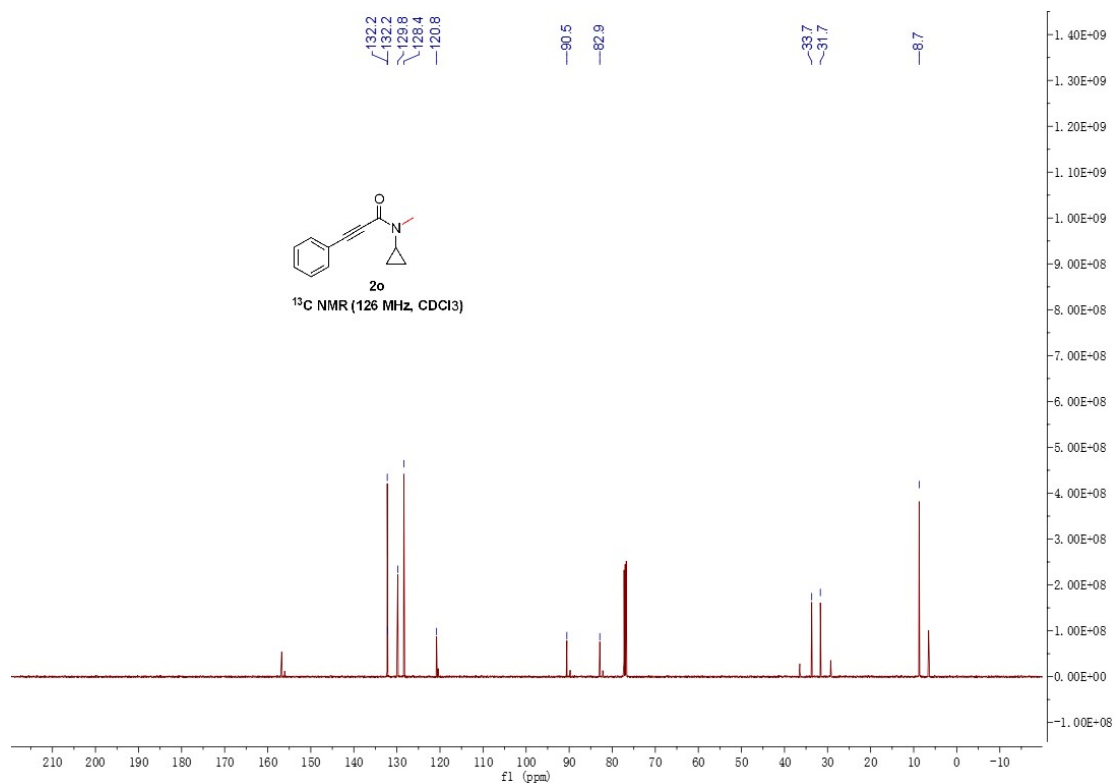

Figure S36. <sup>13</sup>C NMR (126 MHz, CDCl<sub>3</sub>) spectrum of **1o**

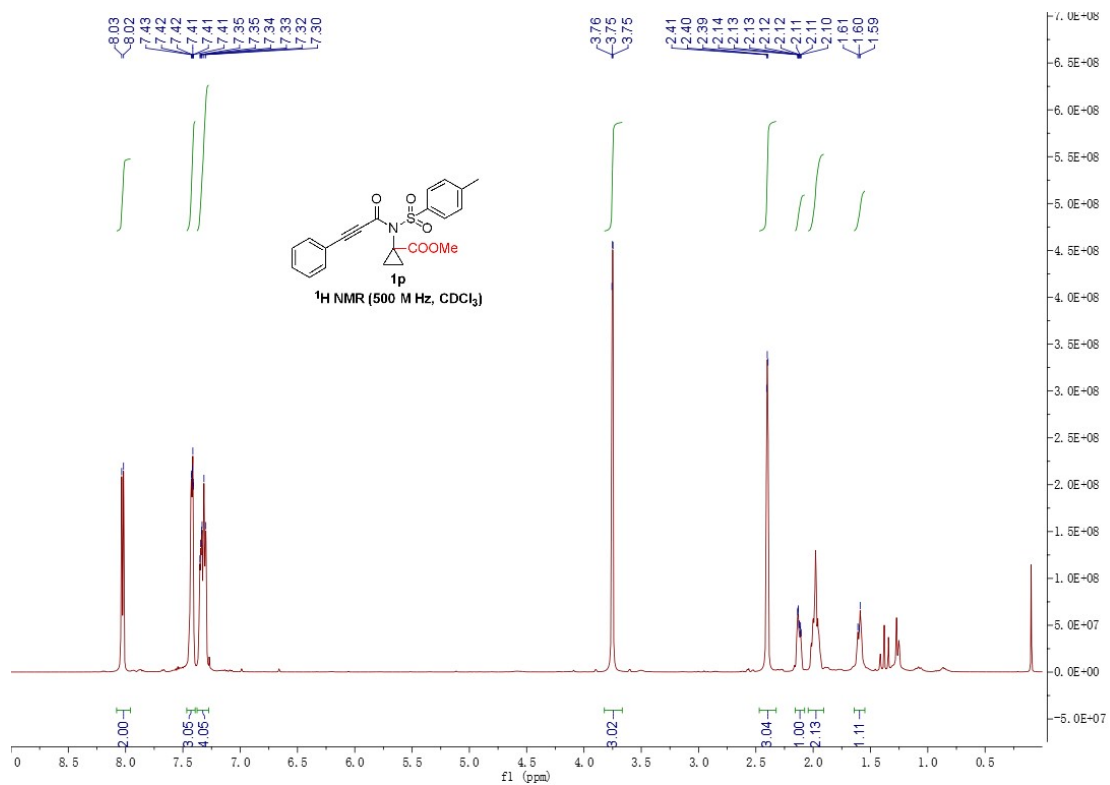

Figure S37. <sup>1</sup>H NMR (500 MHz, CDCl<sub>3</sub>) spectrum of **1p**

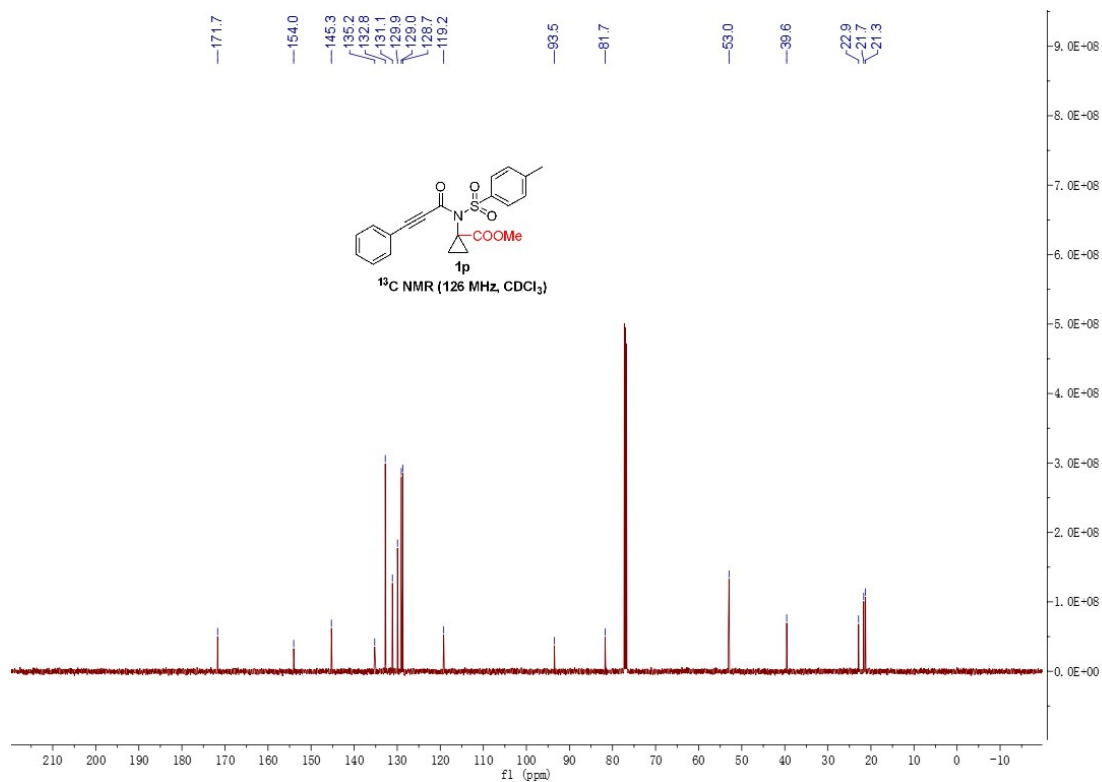

Figure S38. <sup>13</sup>C NMR (126 MHz, CDCl<sub>3</sub>) spectrum of 1p

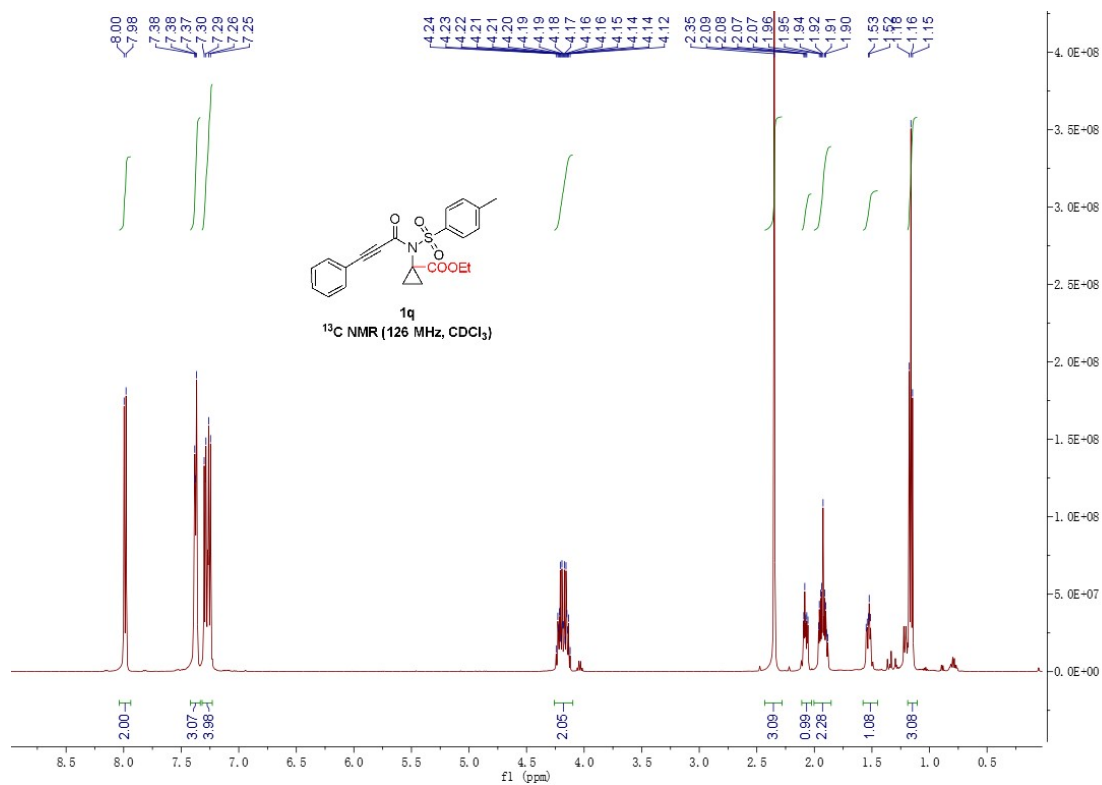

Figure S39. <sup>1</sup>H NMR (500 MHz, CDCl<sub>3</sub>) spectrum of 1q

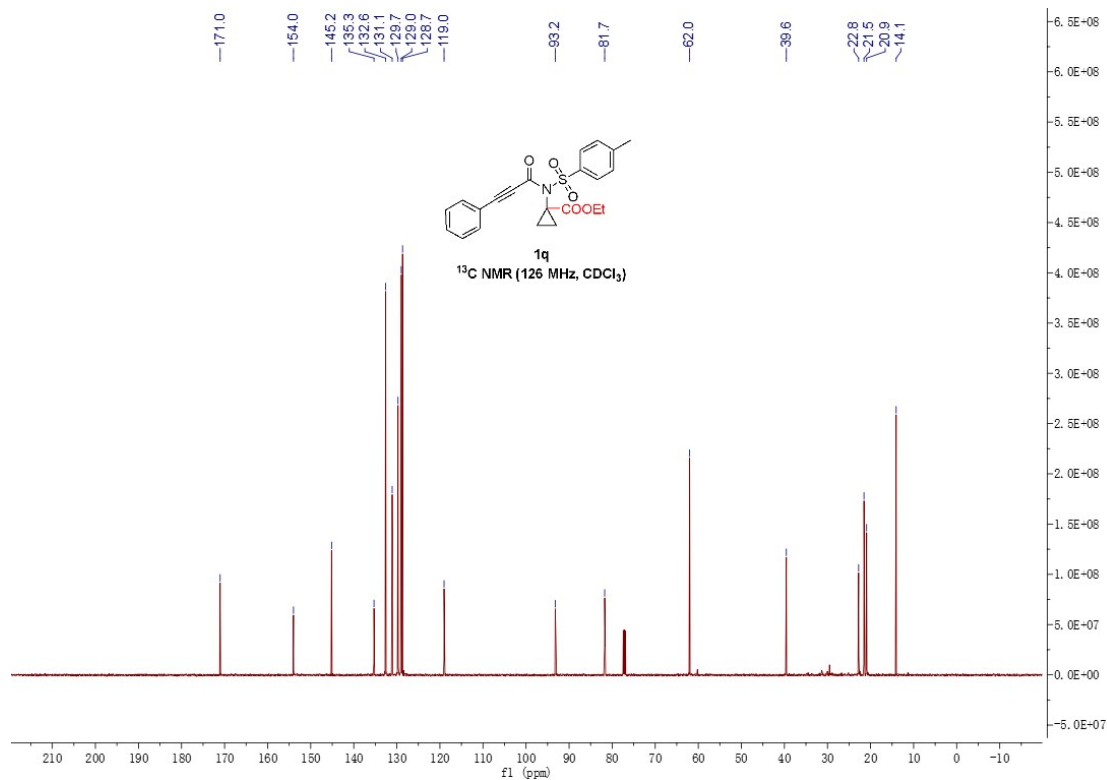

Figure S40. <sup>13</sup>C NMR (126 MHz, CDCl<sub>3</sub>) spectrum of 1q

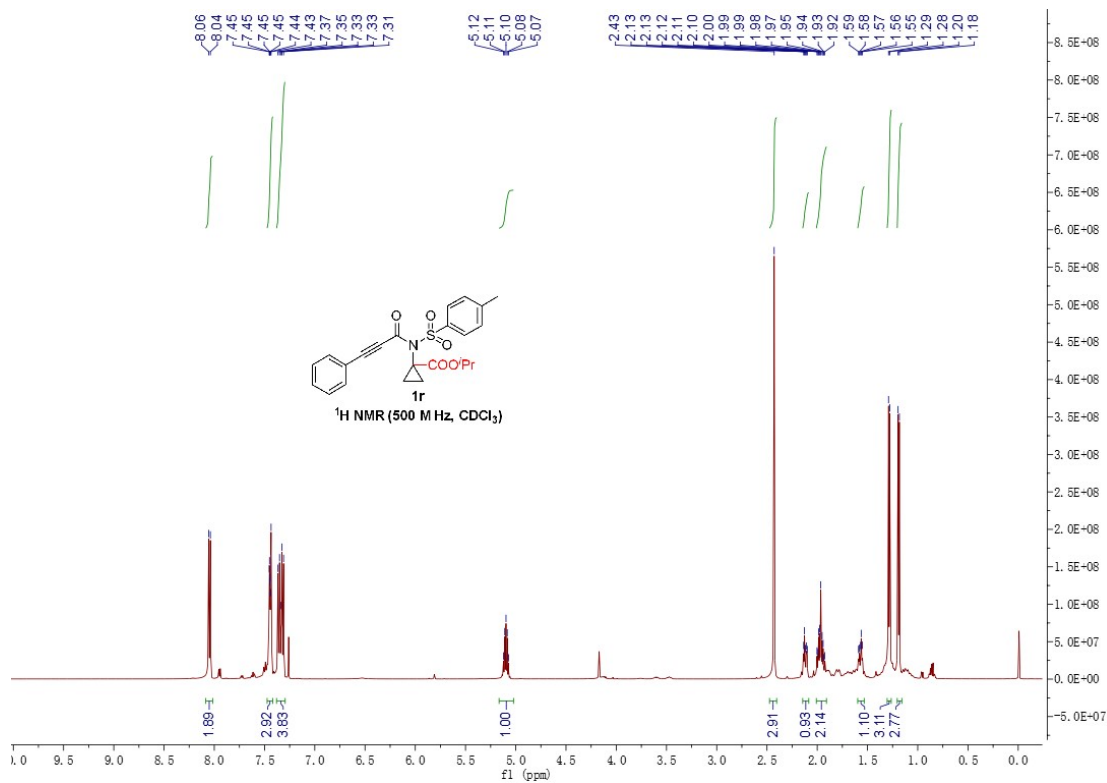

Figure S41. <sup>1</sup>H NMR (500 MHz, CDCl<sub>3</sub>) spectrum of 1r

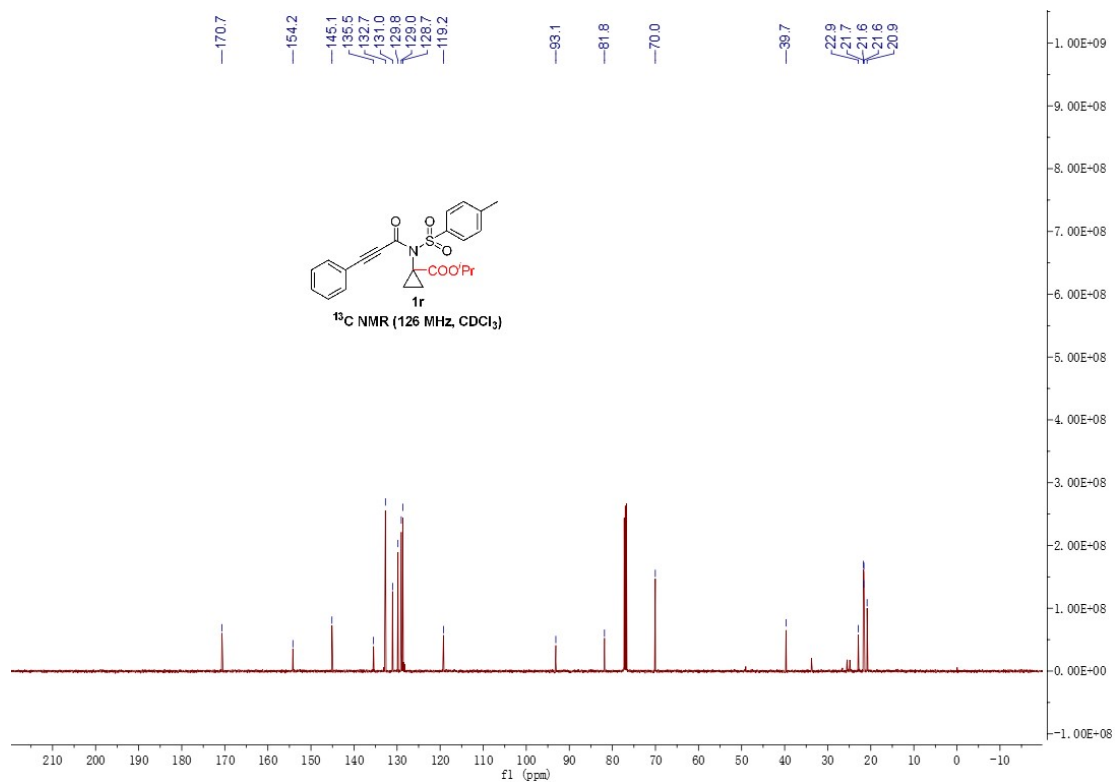

Figure S42. <sup>13</sup>C NMR (126 MHz, CDCl<sub>3</sub>) spectrum of **1r**

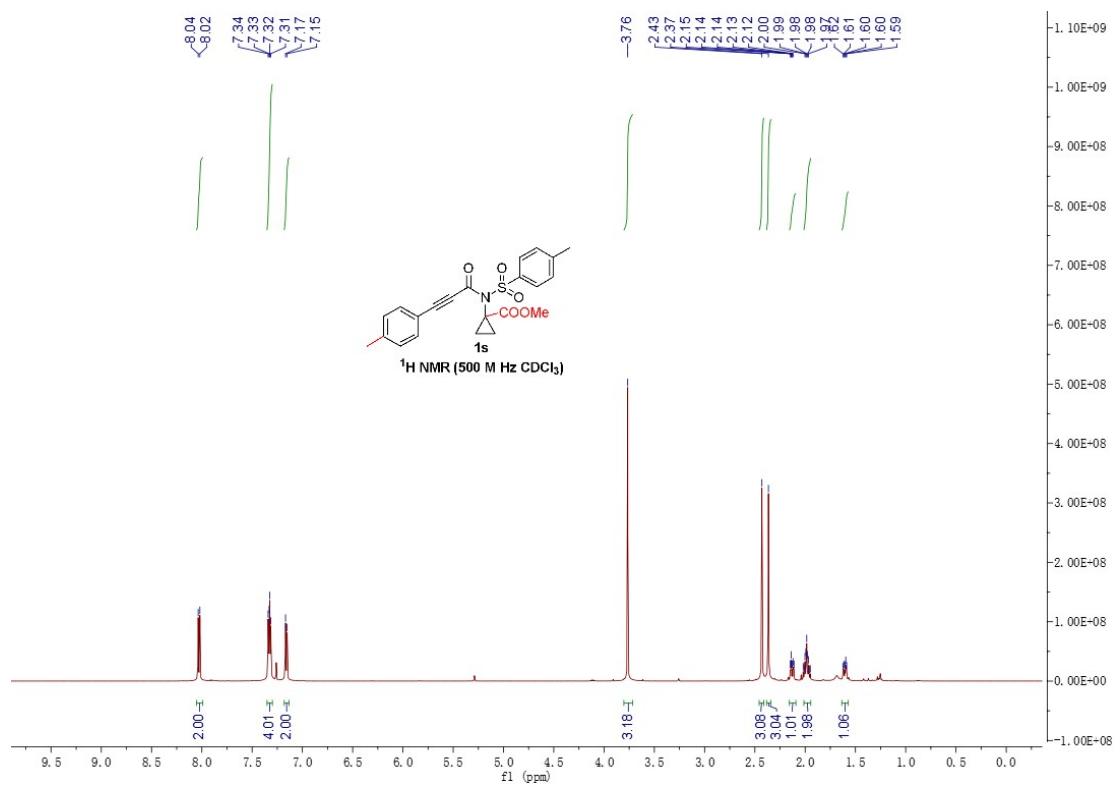

Figure S43. <sup>1</sup>H NMR (500 MHz, CDCl<sub>3</sub>) spectrum of **1s**

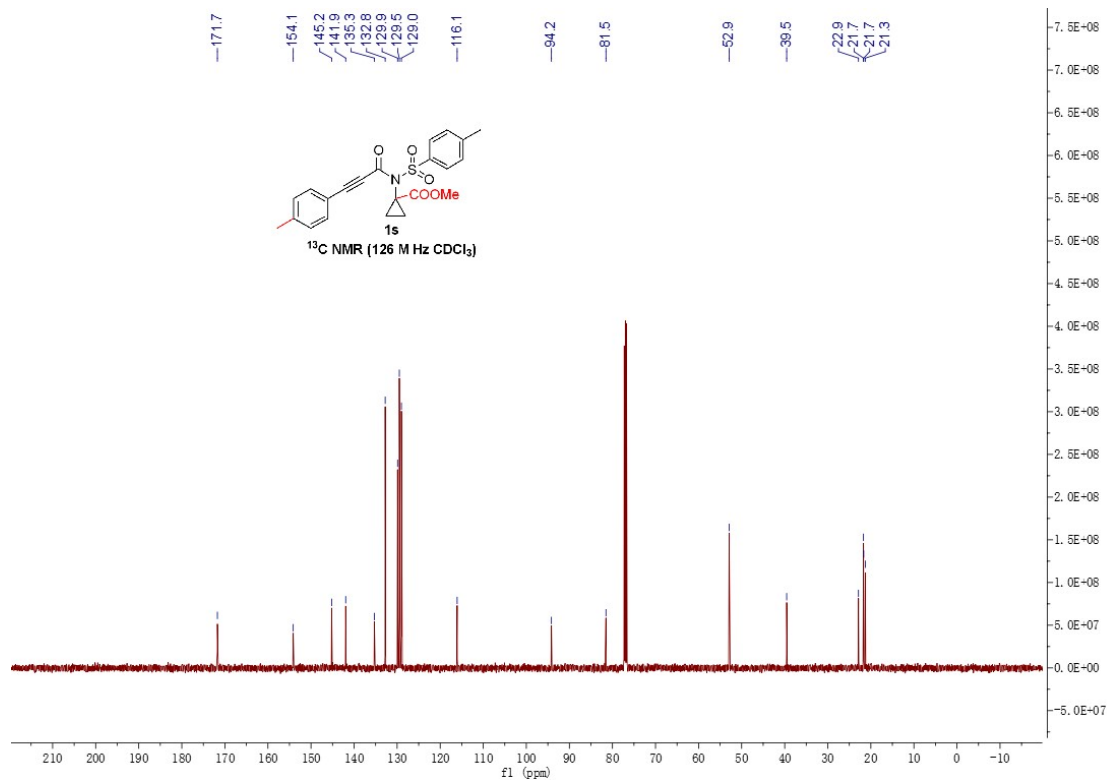

Figure S44. <sup>13</sup>C NMR (126 MHz, CDCl<sub>3</sub>) spectrum of 1s

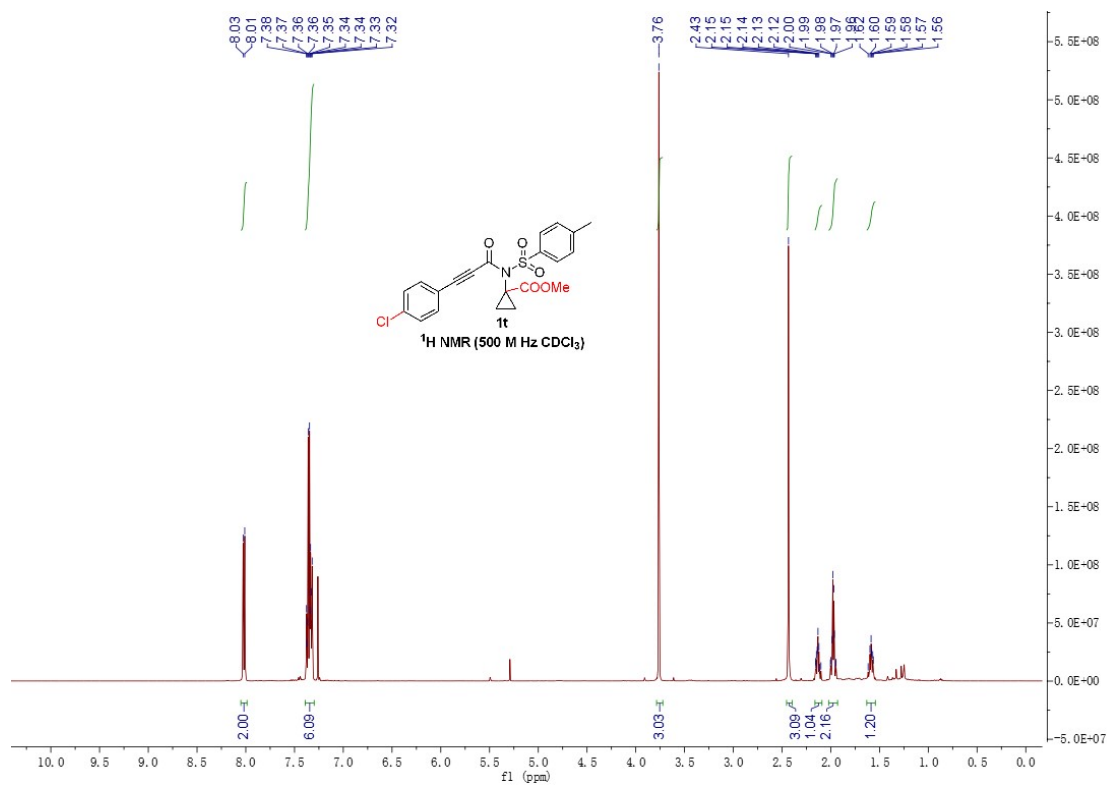

Figure S45. <sup>1</sup>H NMR (500 MHz, CDCl<sub>3</sub>) spectrum of 1t



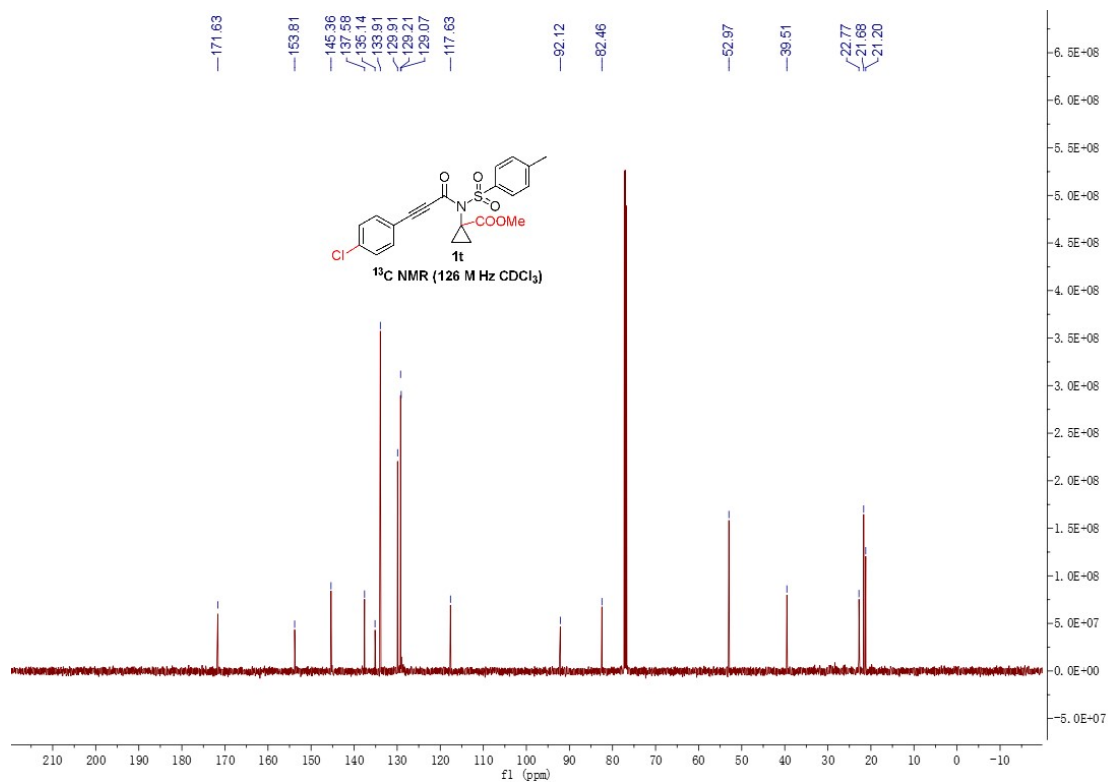

Figure S46. <sup>13</sup>C NMR (126 MHz, CDCl<sub>3</sub>) spectrum of 2a

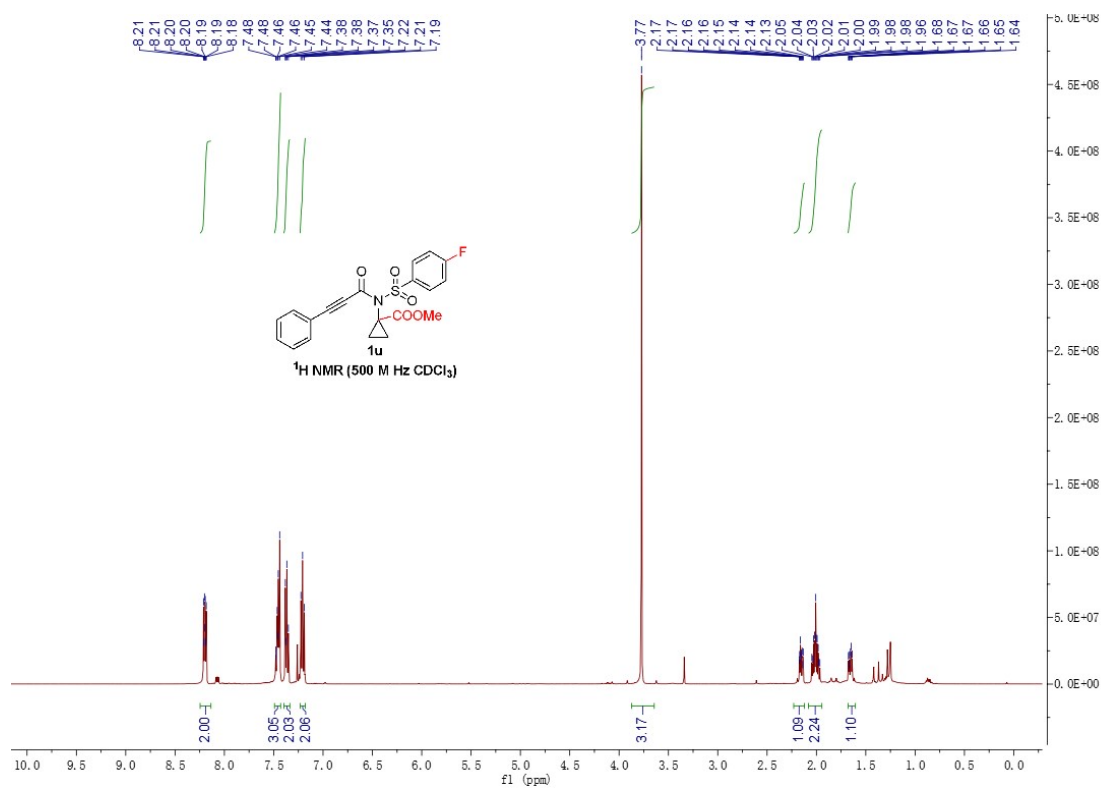

Figure S47. <sup>1</sup>H NMR (500 MHz, CDCl<sub>3</sub>) spectrum of 1u

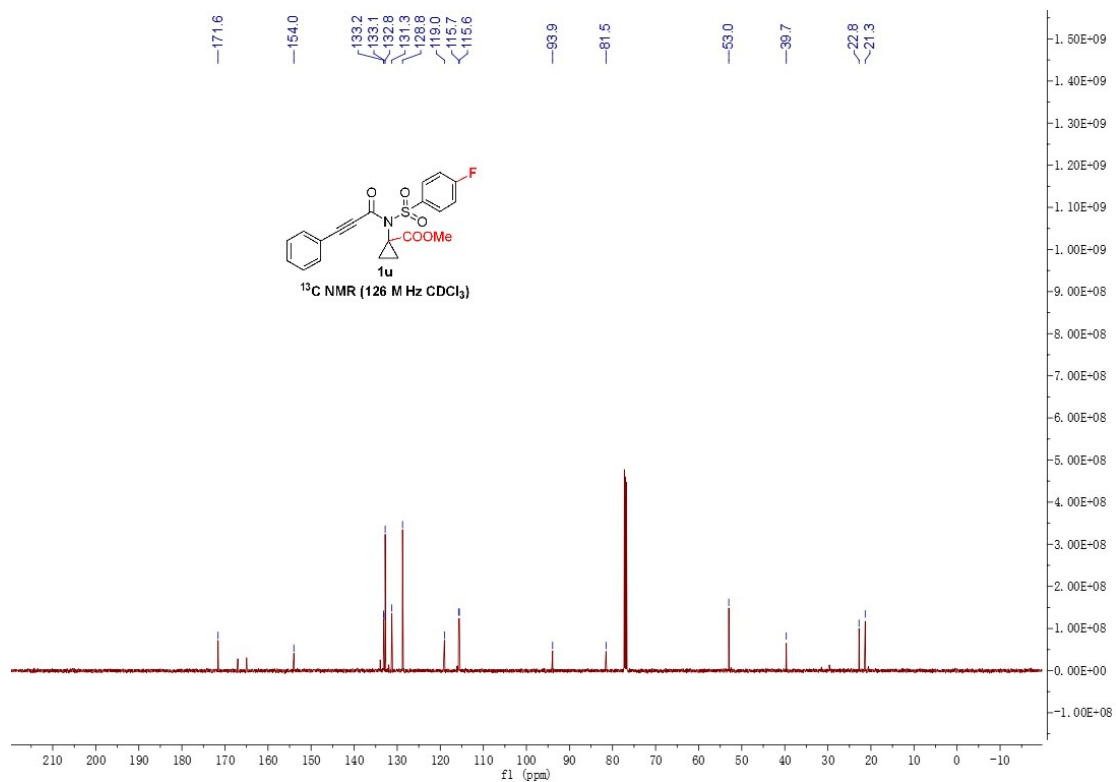

**Figure S48.** <sup>13</sup>C NMR (126 MHz, CDCl<sub>3</sub>) spectrum of **2a**

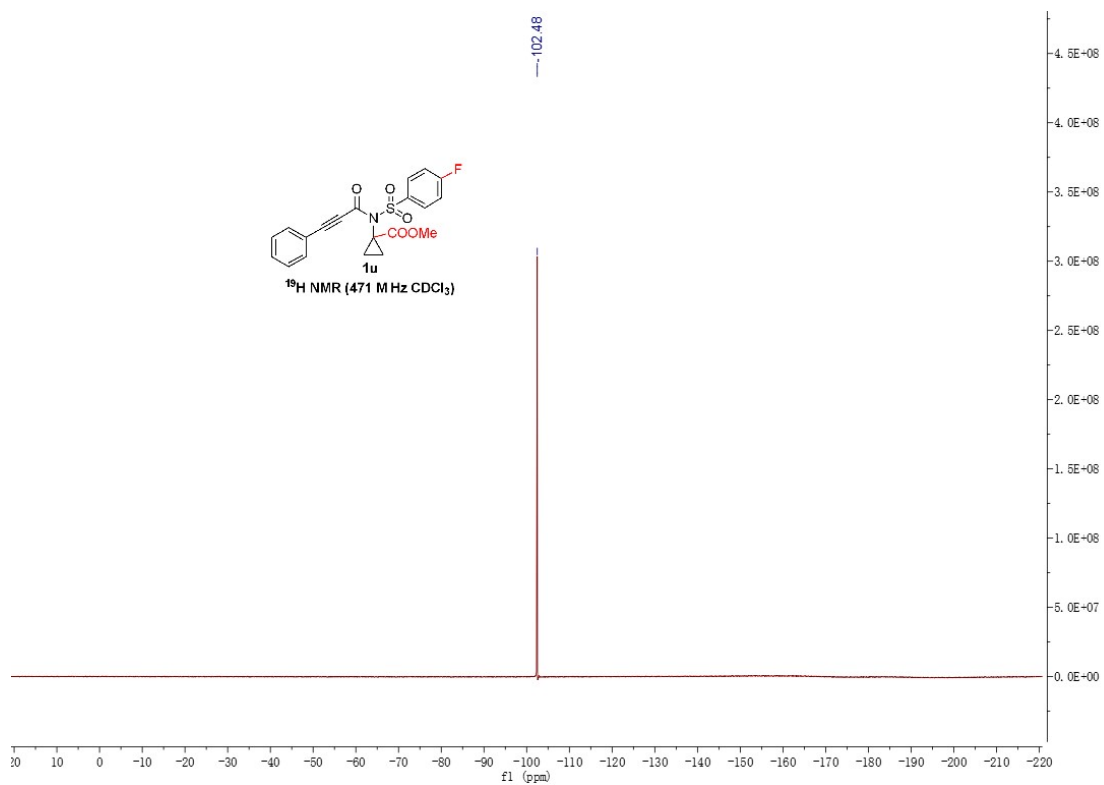

**Figure S49.** <sup>19</sup>F NMR (471 MHz, CDCl<sub>3</sub>) spectrum of **1u5**

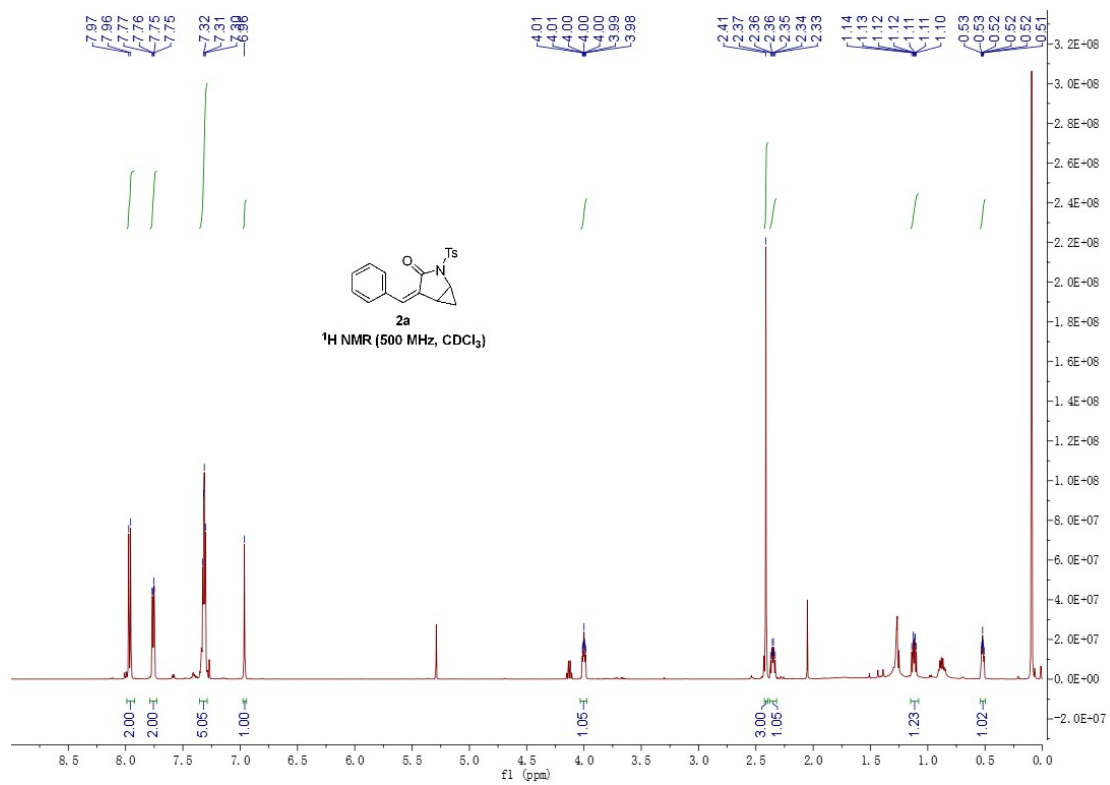

Figure S50.  $^1\text{H NMR}$  (500 MHz,  $\text{CDCl}_3$ ) spectrum of **2a**

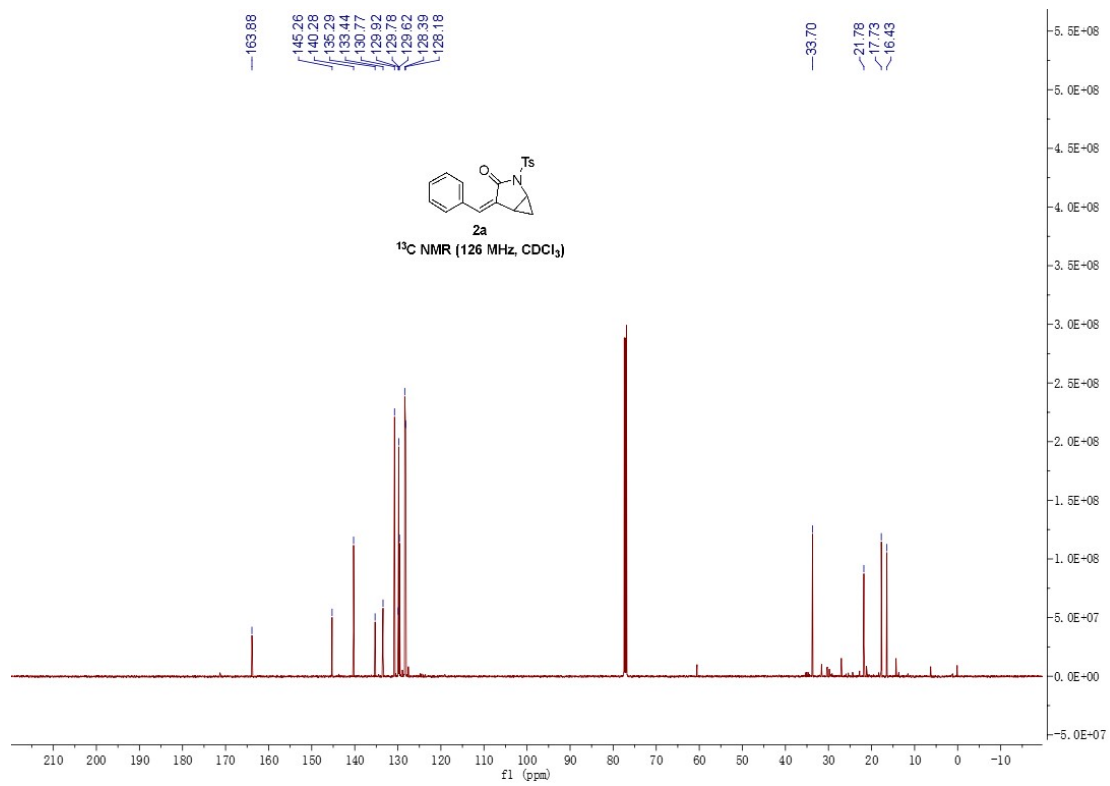

Figure S51.  $^{13}\text{C NMR}$  (126 MHz,  $\text{CDCl}_3$ ) spectrum of **2a**

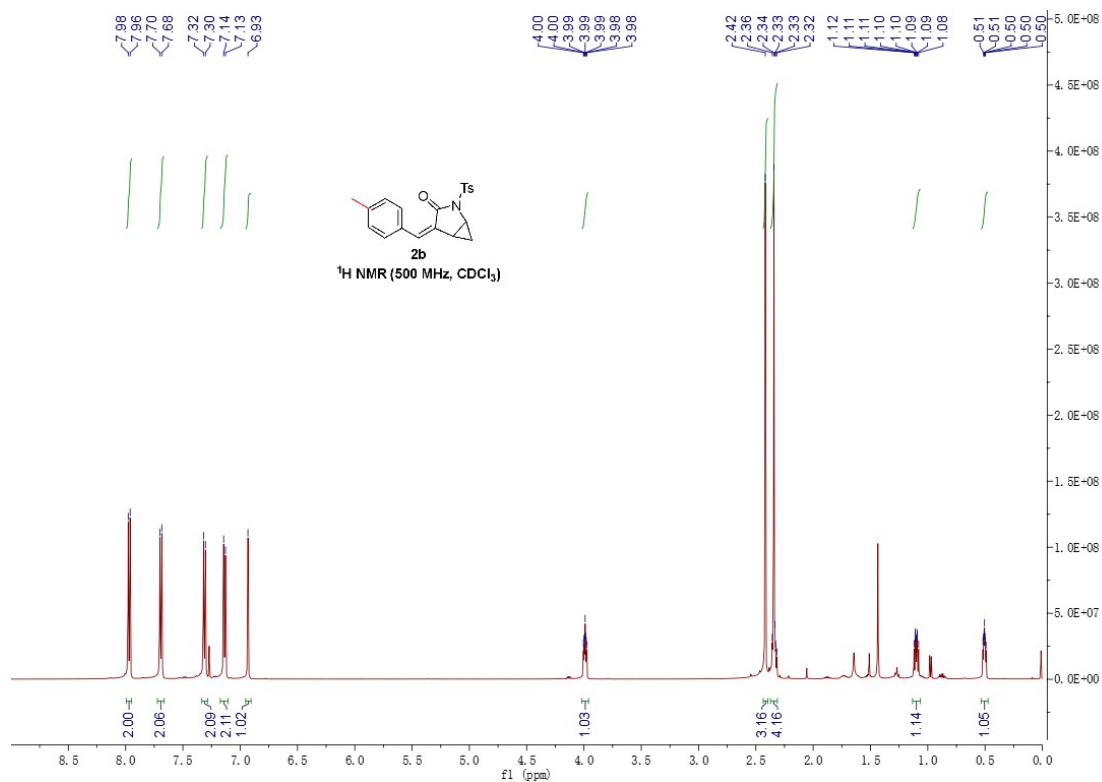

Figure S52. <sup>1</sup>H NMR (500 MHz, CDCl<sub>3</sub>) spectrum of **2b**

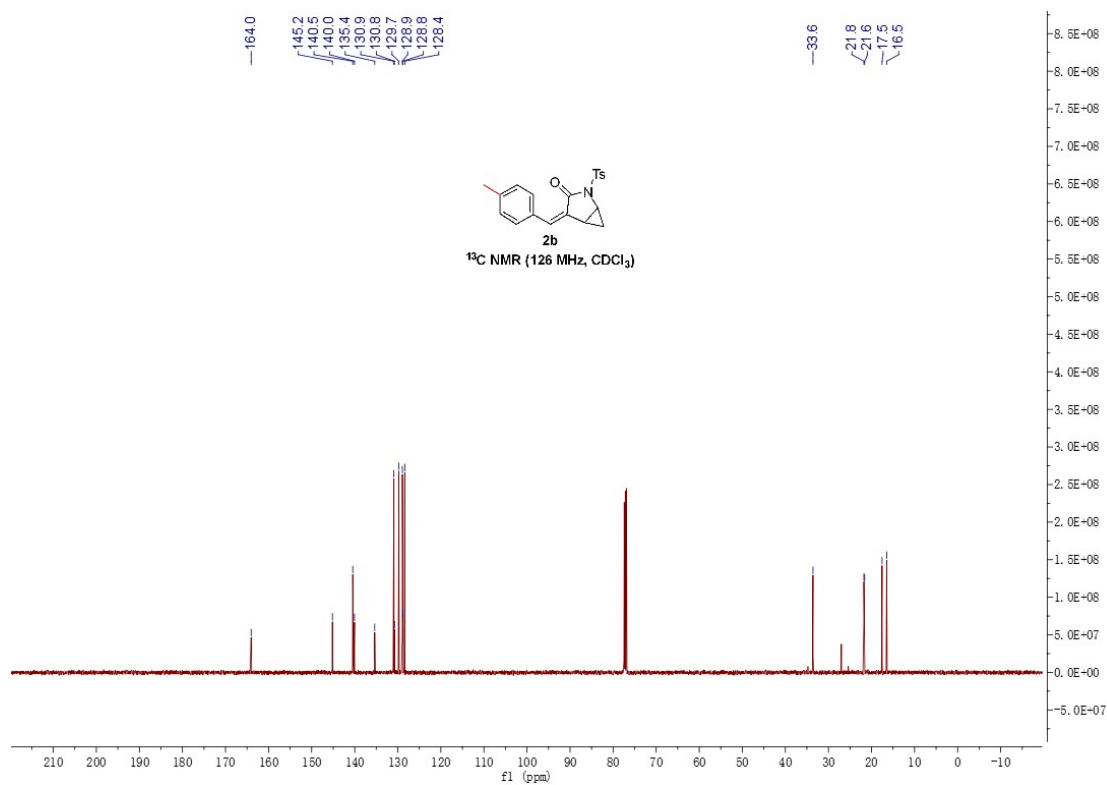

Figure S53. <sup>13</sup>C NMR (126 MHz, CDCl<sub>3</sub>) spectrum of **2b**

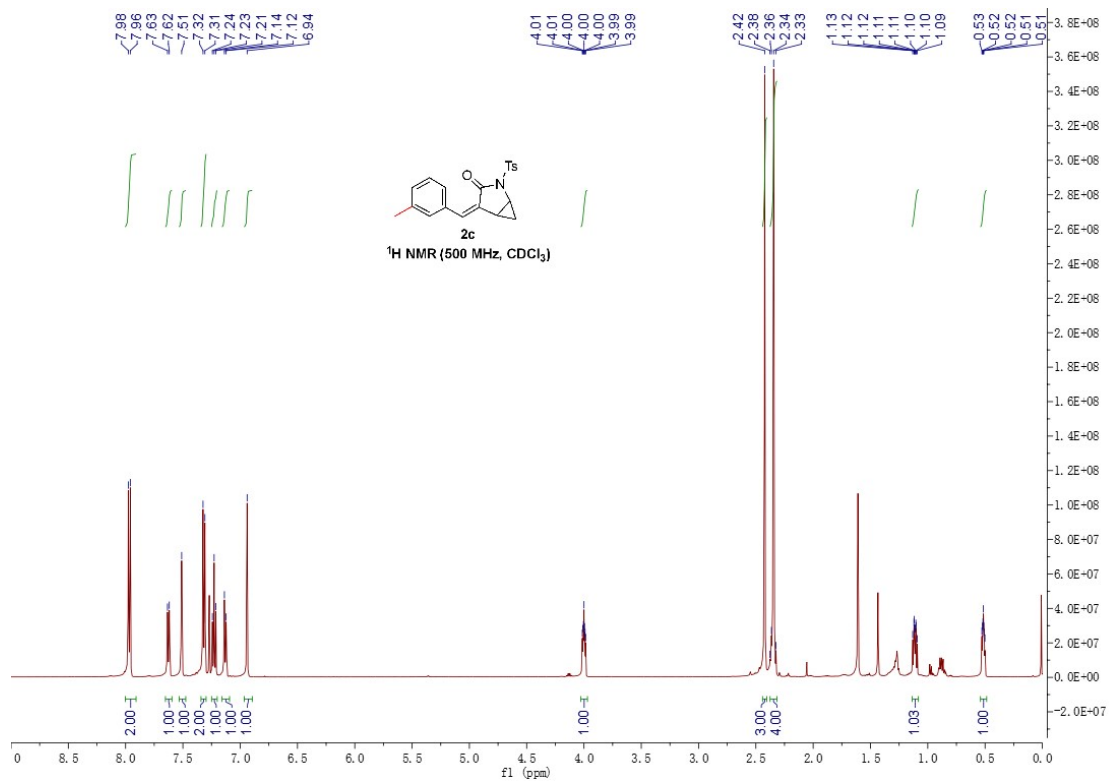

Figure S54. <sup>1</sup>H NMR (500 MHz, CDCl<sub>3</sub>) spectrum of **2c**

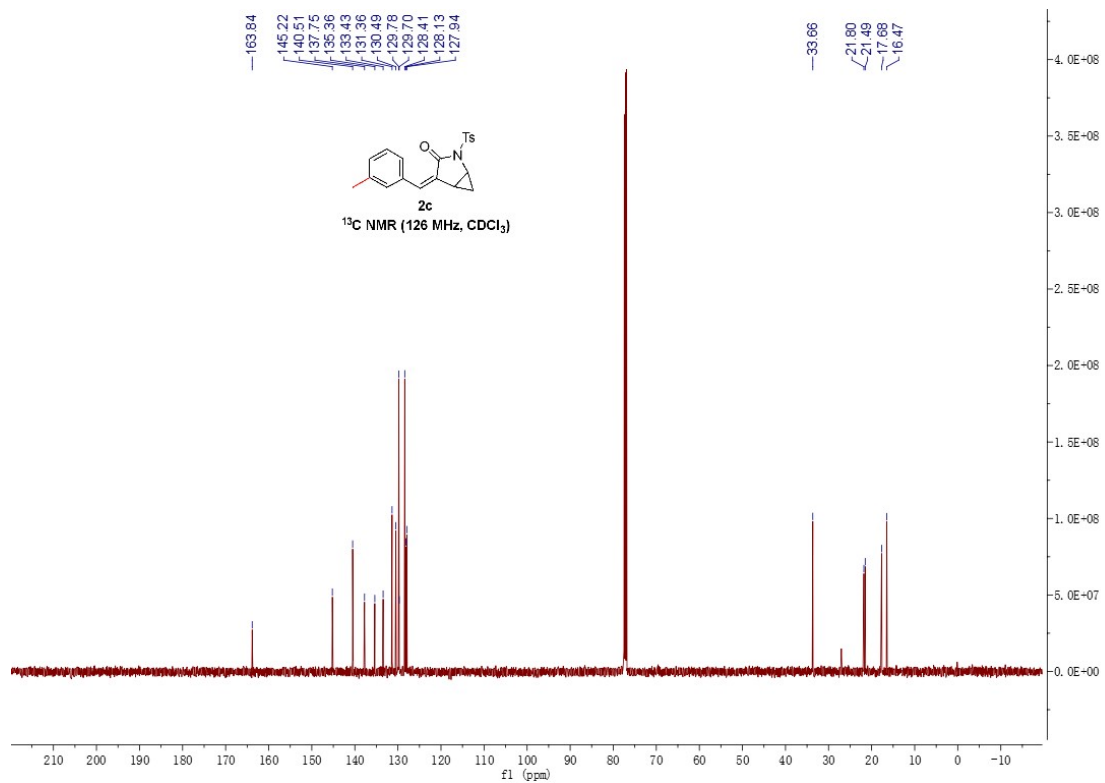

Figure S55. <sup>13</sup>C NMR (126 MHz, CDCl<sub>3</sub>) spectrum of **2c**

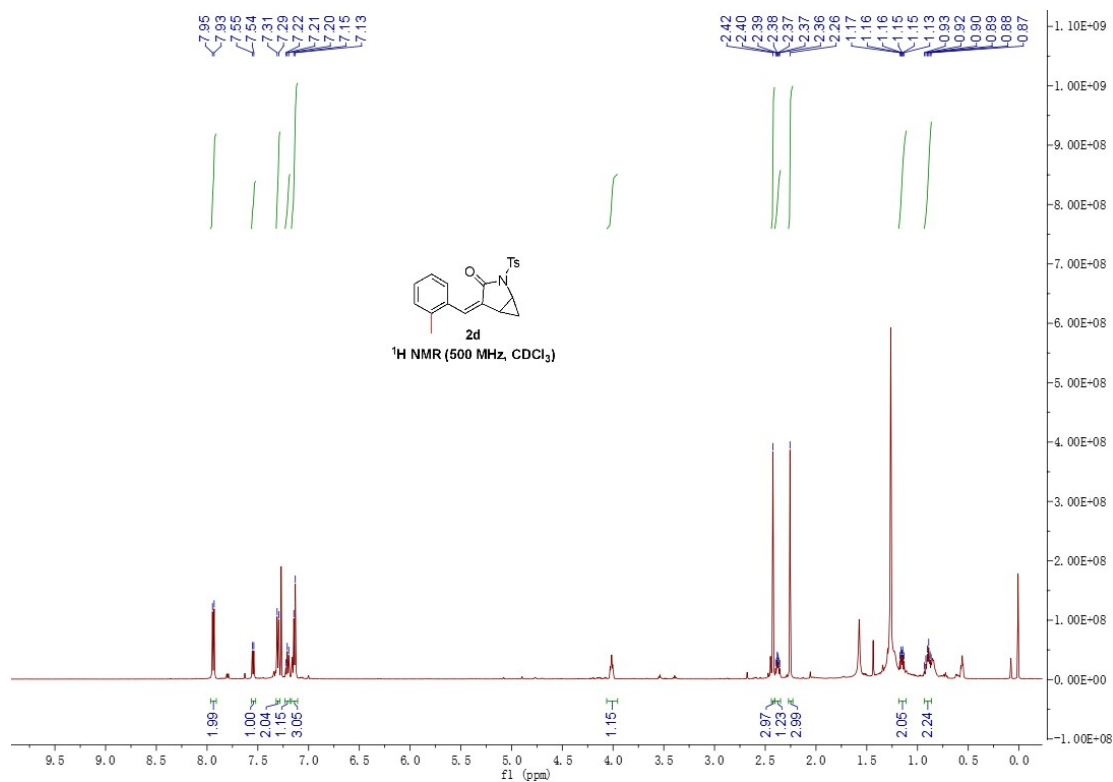

Figure S56. <sup>1</sup>H NMR (500 MHz, CDCl<sub>3</sub>) spectrum of 2d

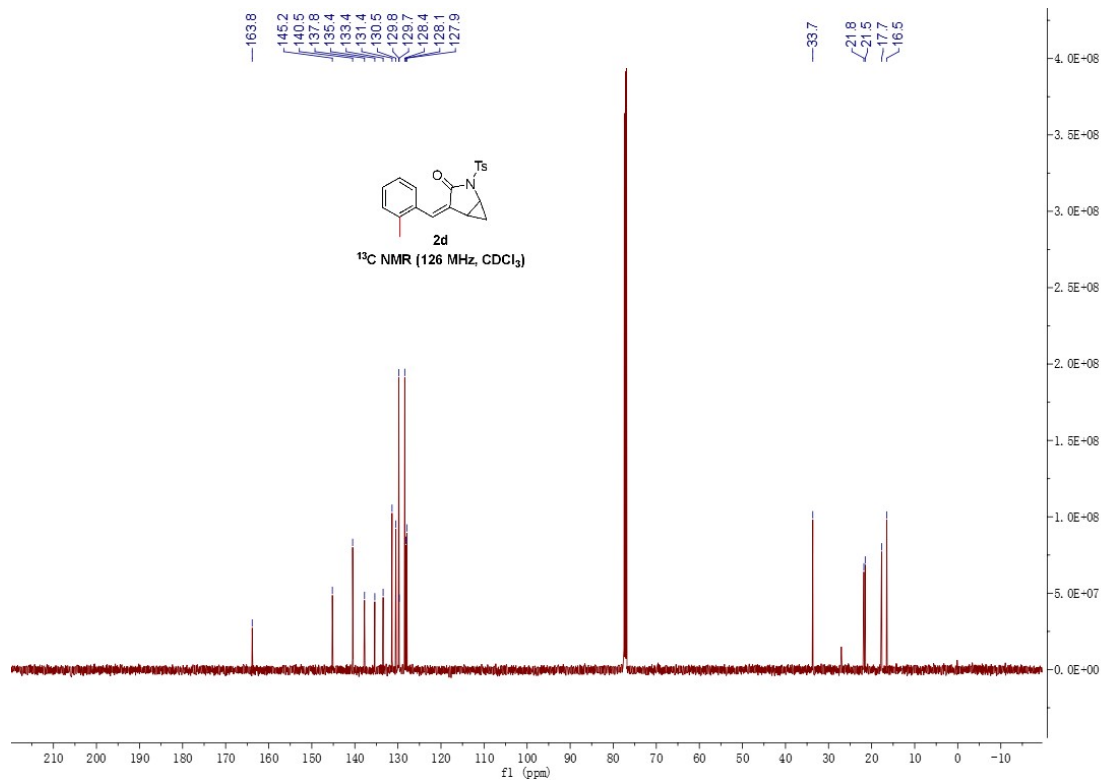

Figure S57. <sup>13</sup>C NMR (126 MHz, CDCl<sub>3</sub>) spectrum of 2d

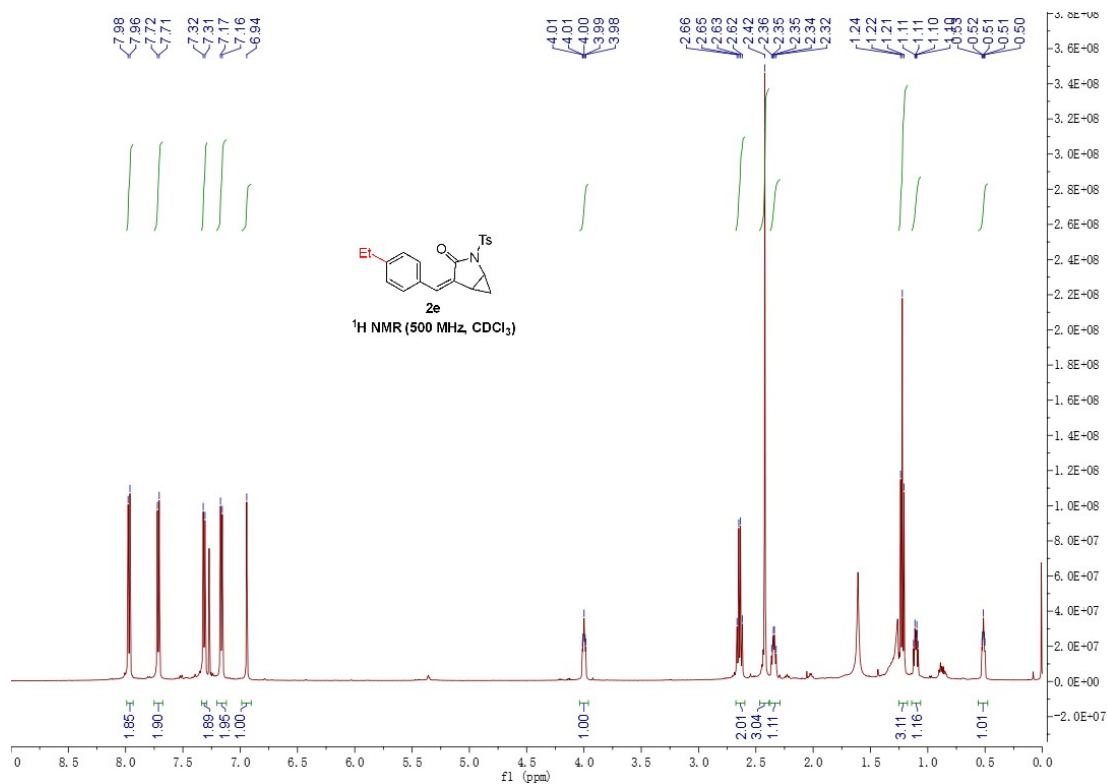

Figure S58. <sup>1</sup>H NMR (500 MHz, CDCl<sub>3</sub>) spectrum of **2e**

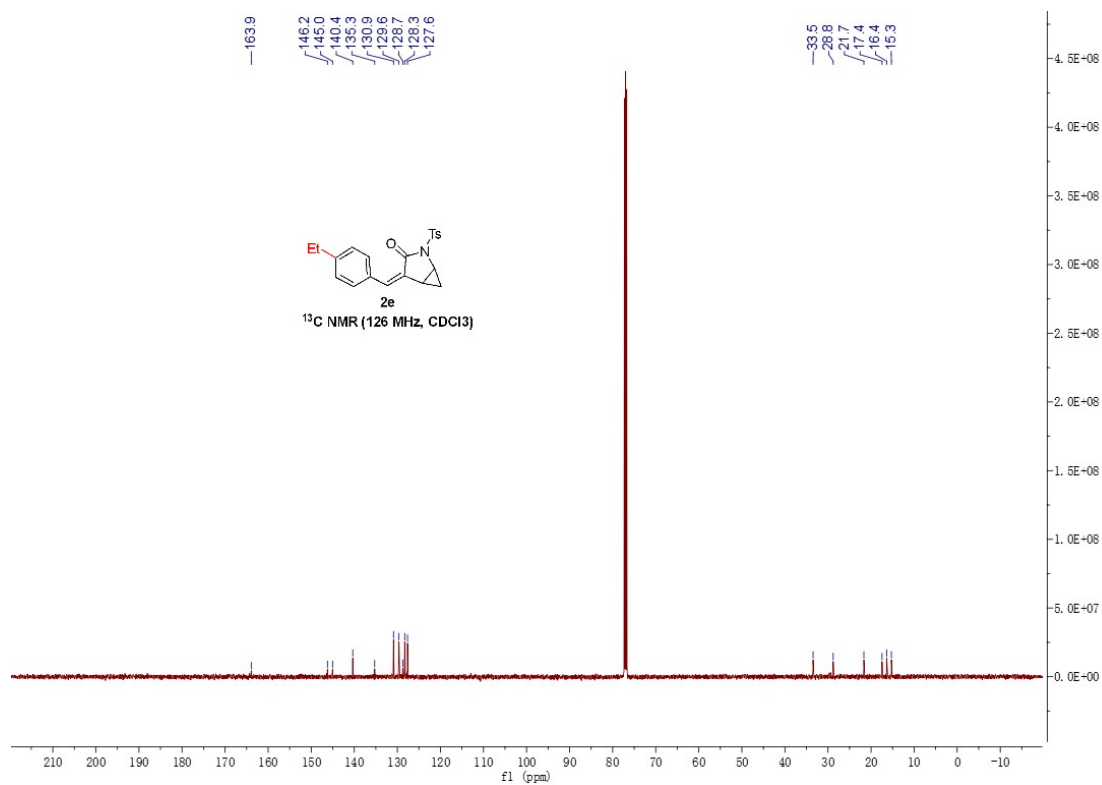

Figure S59. <sup>13</sup>C NMR (126 MHz, CDCl<sub>3</sub>) spectrum of **2e**

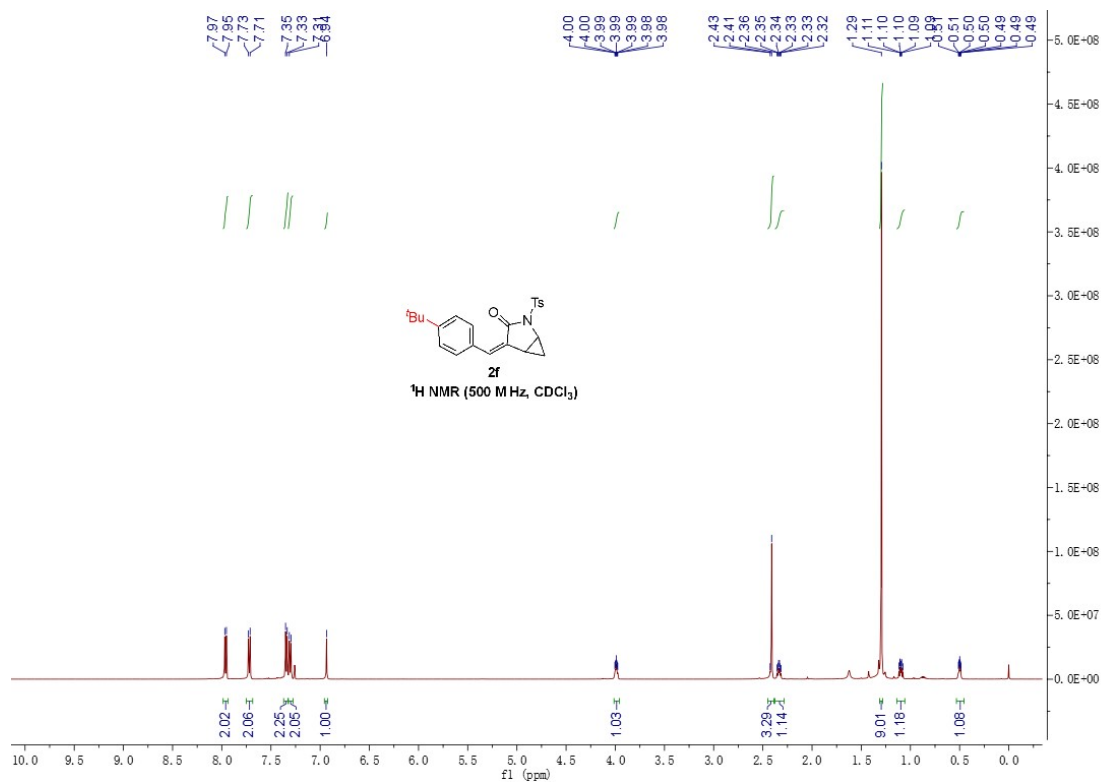

Figure S60. <sup>1</sup>H NMR (500 MHz, CDCl<sub>3</sub>) spectrum of **2f**

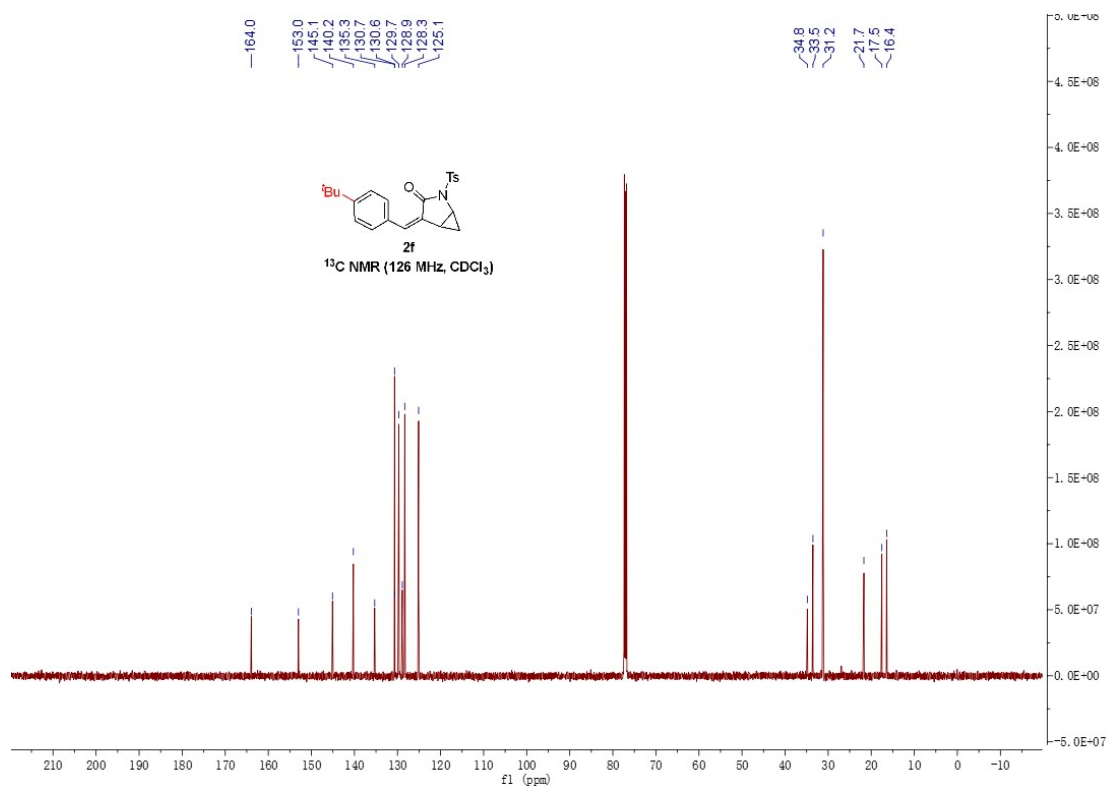

Figure S61. <sup>13</sup>C NMR (126 MHz, CDCl<sub>3</sub>) spectrum of **2f**



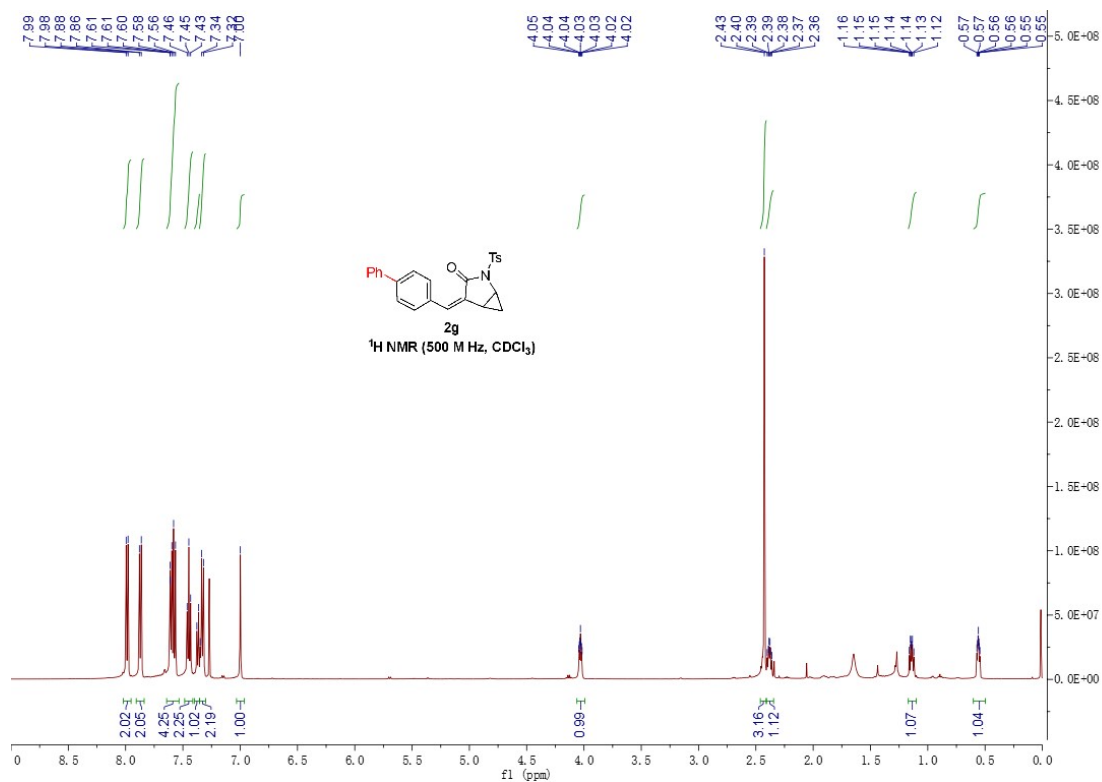

Figure S62. <sup>1</sup>H NMR (500 MHz, CDCl<sub>3</sub>) spectrum of 2g

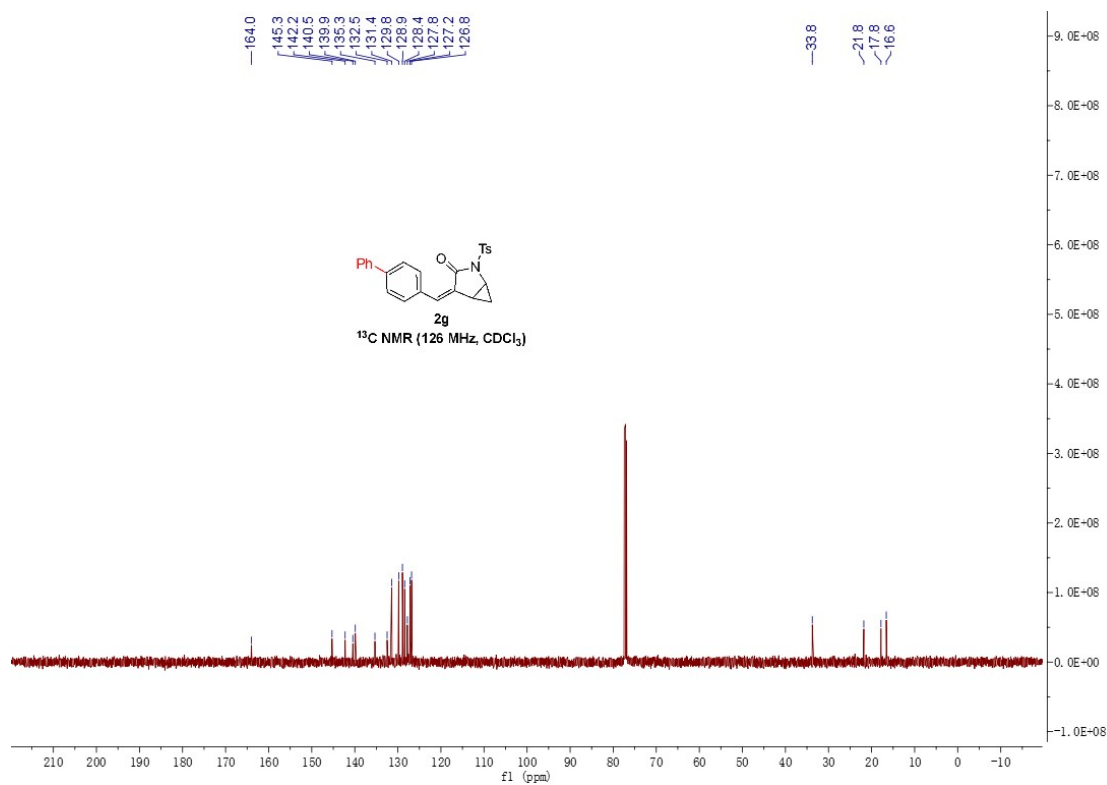

Figure S63. <sup>13</sup>C NMR (126 MHz, CDCl<sub>3</sub>) spectrum of 2g

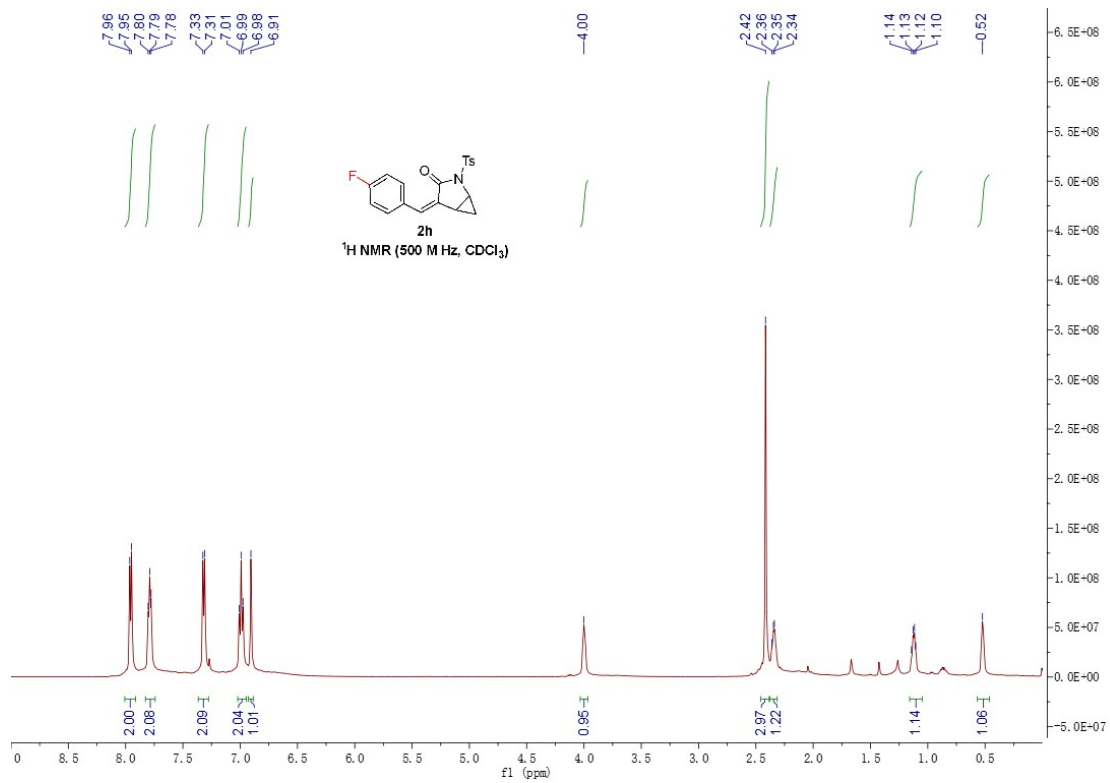

Figure S64. <sup>1</sup>H NMR (500 MHz, CDCl<sub>3</sub>) spectrum of 2h

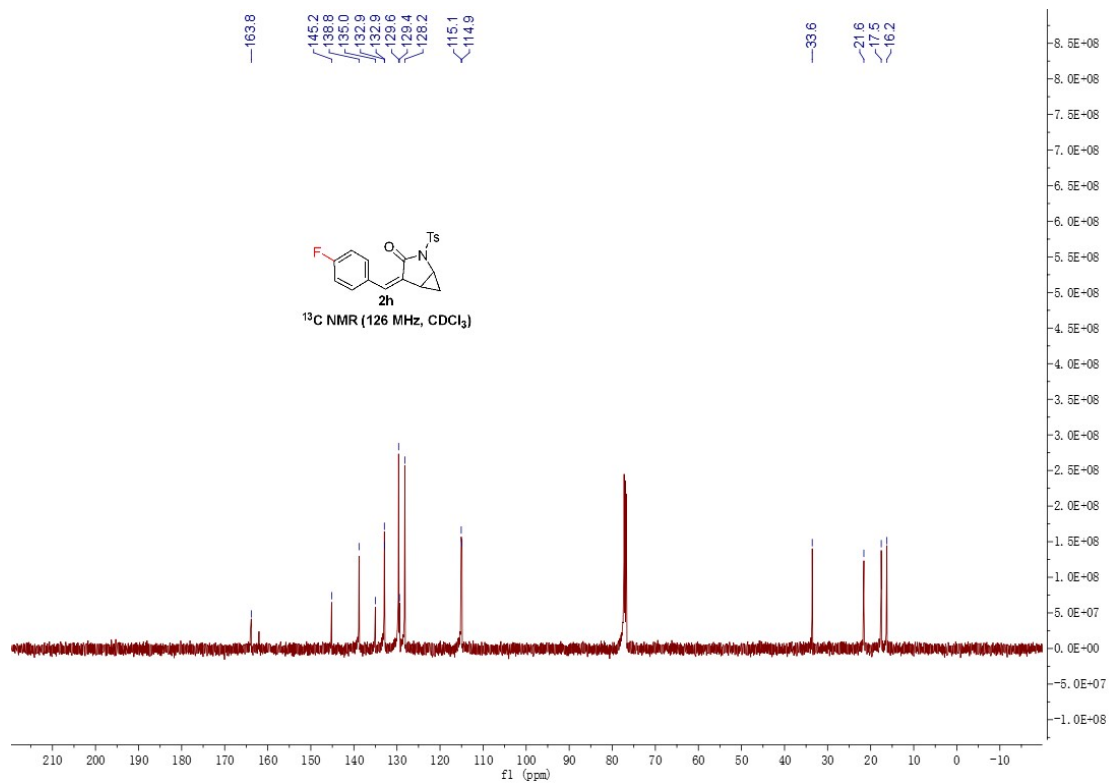

Figure S65. <sup>13</sup>C NMR (126 MHz, CDCl<sub>3</sub>) spectrum of 2i

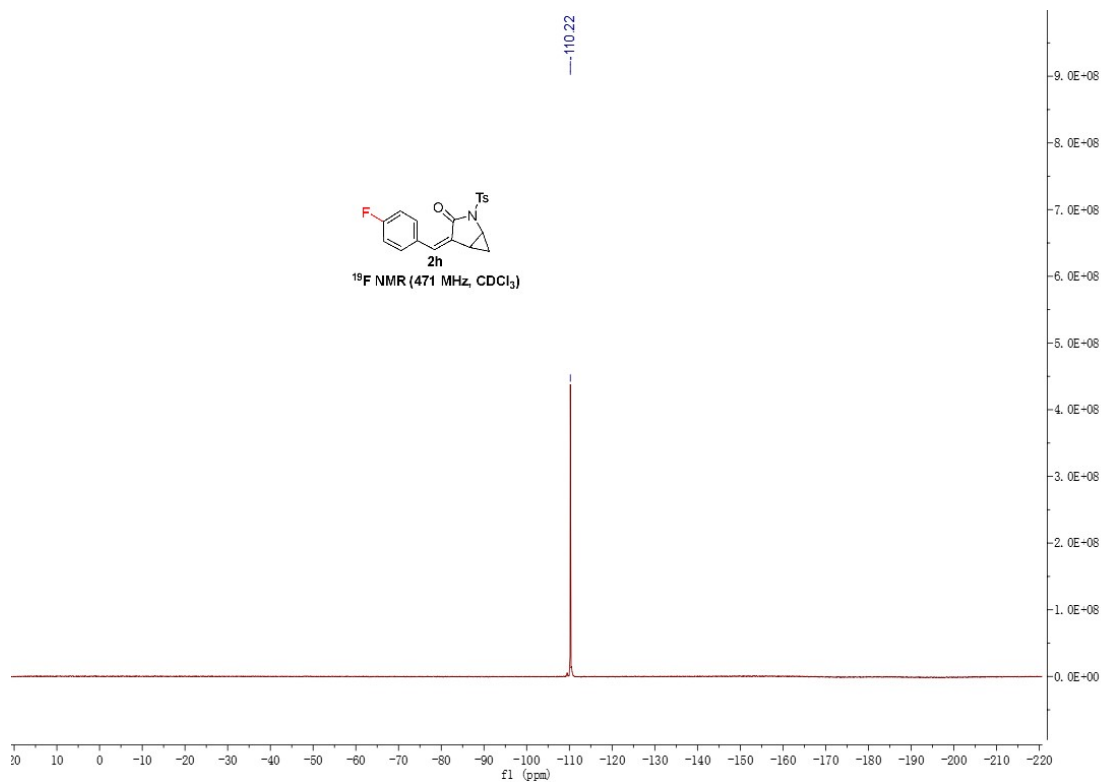

Figure S66. <sup>19</sup>F NMR (471 MHz, CDCl<sub>3</sub>) spectrum of 2h

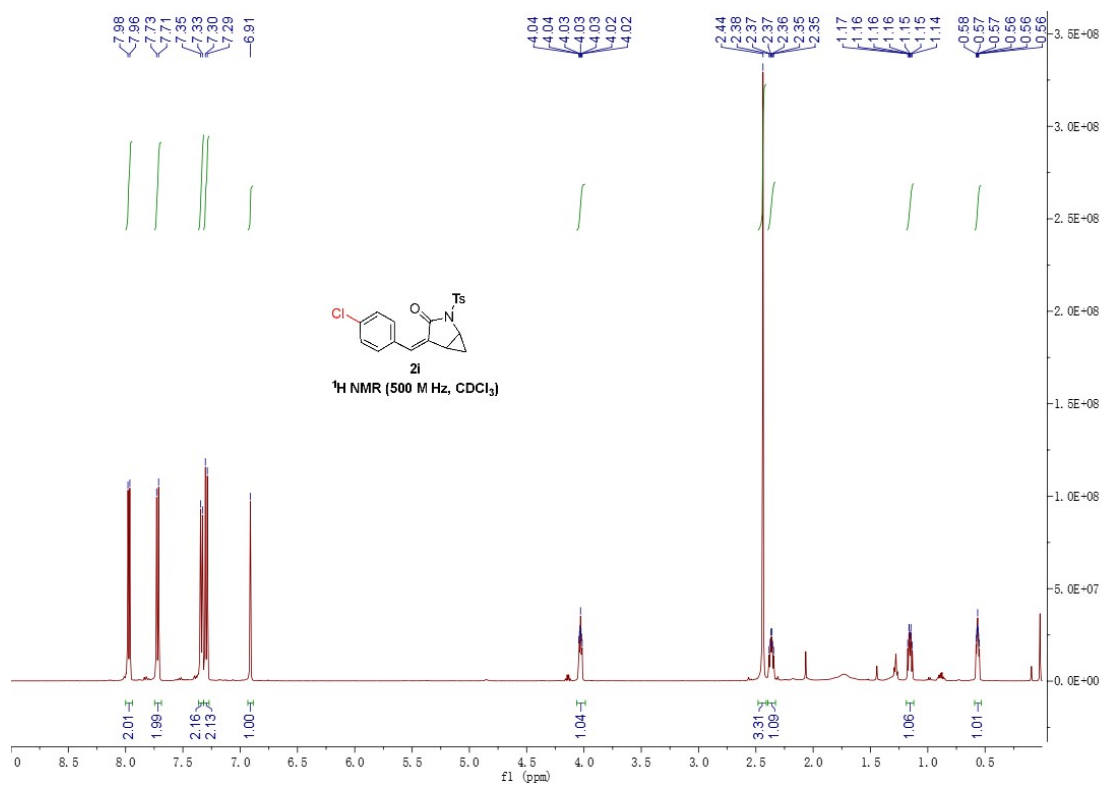

Figure S67. <sup>1</sup>H NMR (500 MHz, CDCl<sub>3</sub>) spectrum of 2i



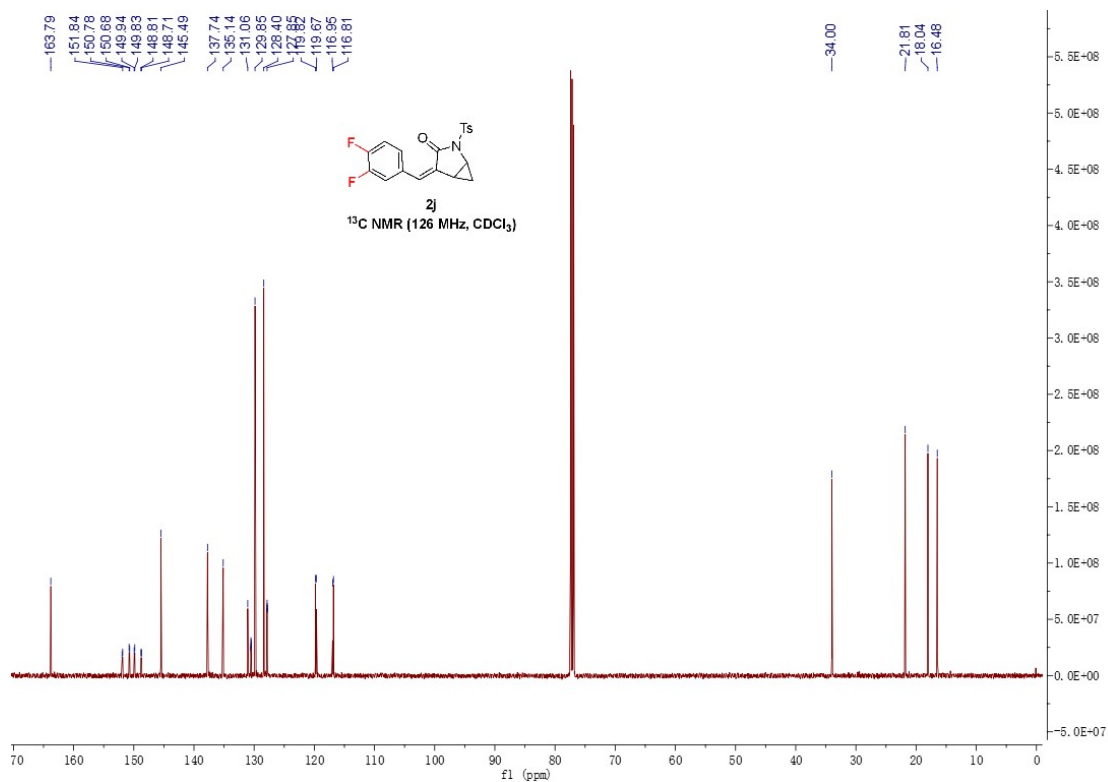

Figure S70. <sup>13</sup>C NMR (126 MHz, CDCl<sub>3</sub>) spectrum of **2j**

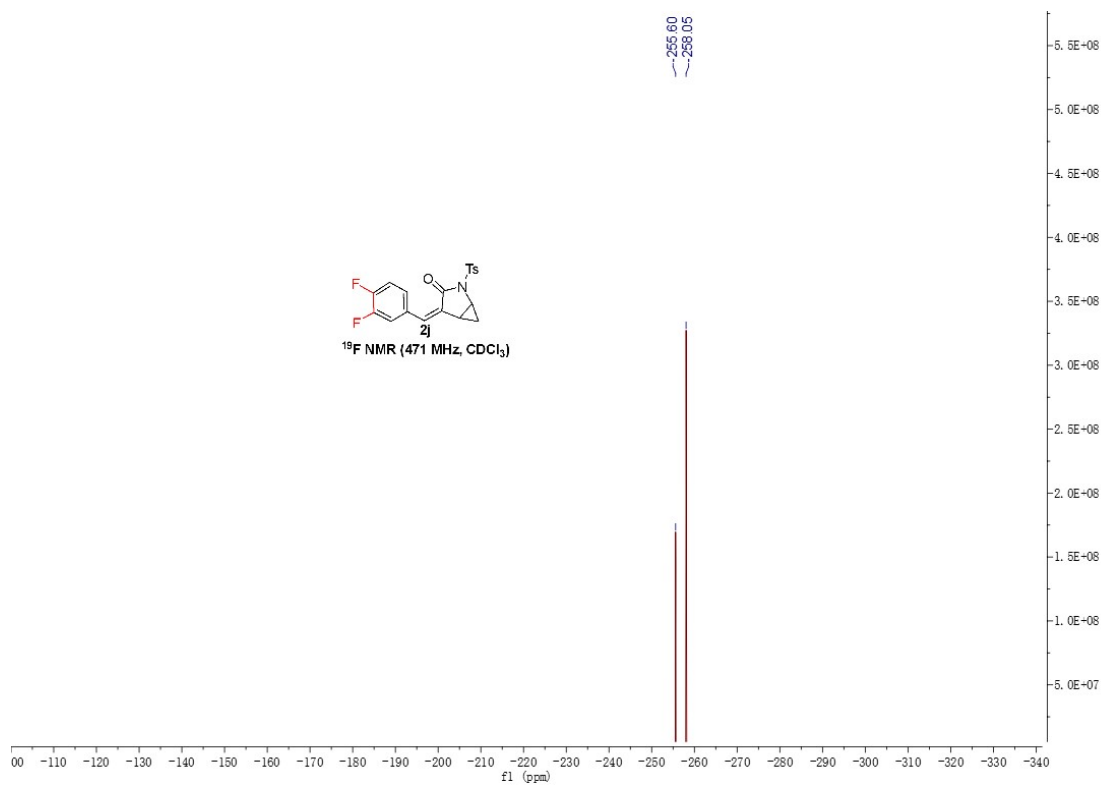

Figure S71. <sup>19</sup>F NMR (471 MHz, CDCl<sub>3</sub>) spectrum of **2j**

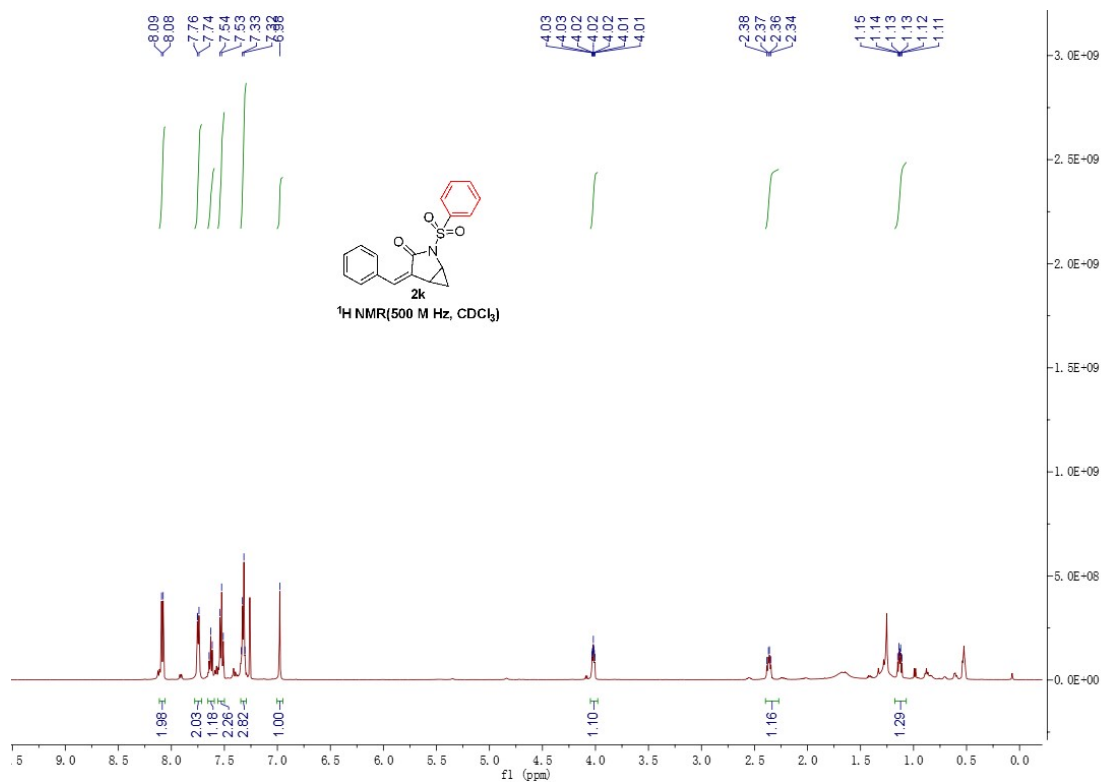

Figure S70. <sup>1</sup>H NMR (500 MHz, CDCl<sub>3</sub>) spectrum of 2k

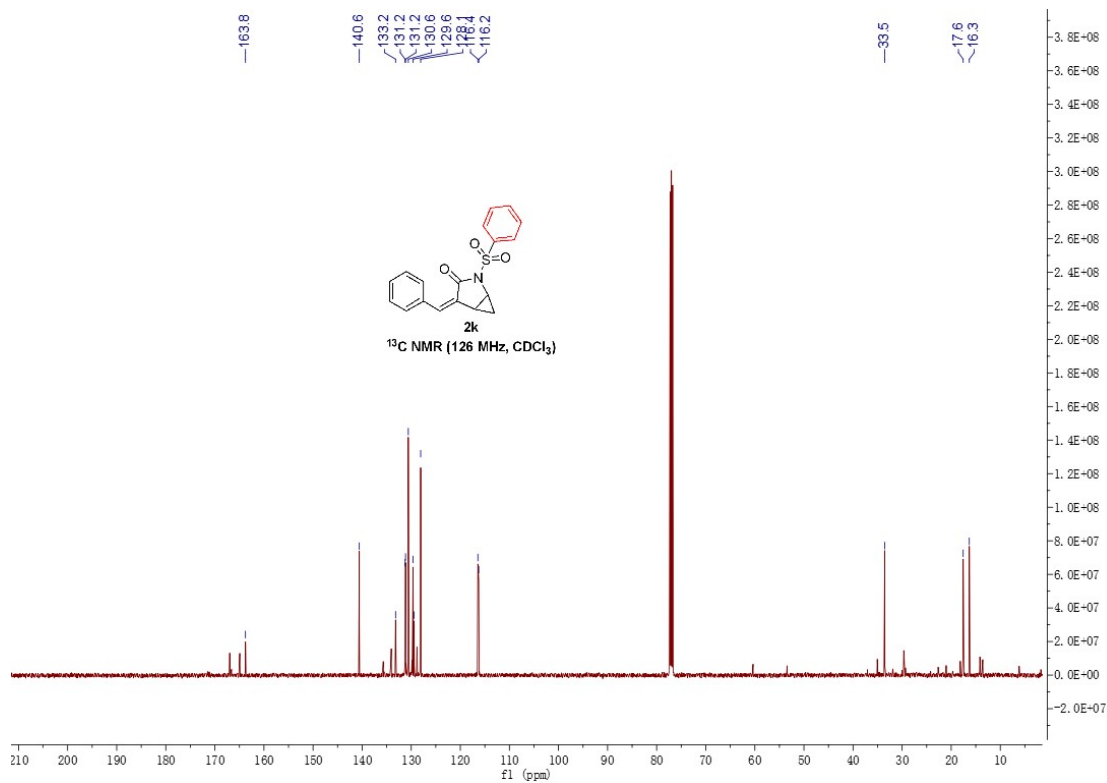

Figure S73. <sup>13</sup>C NMR (126 MHz, CDCl<sub>3</sub>) spectrum of 2k

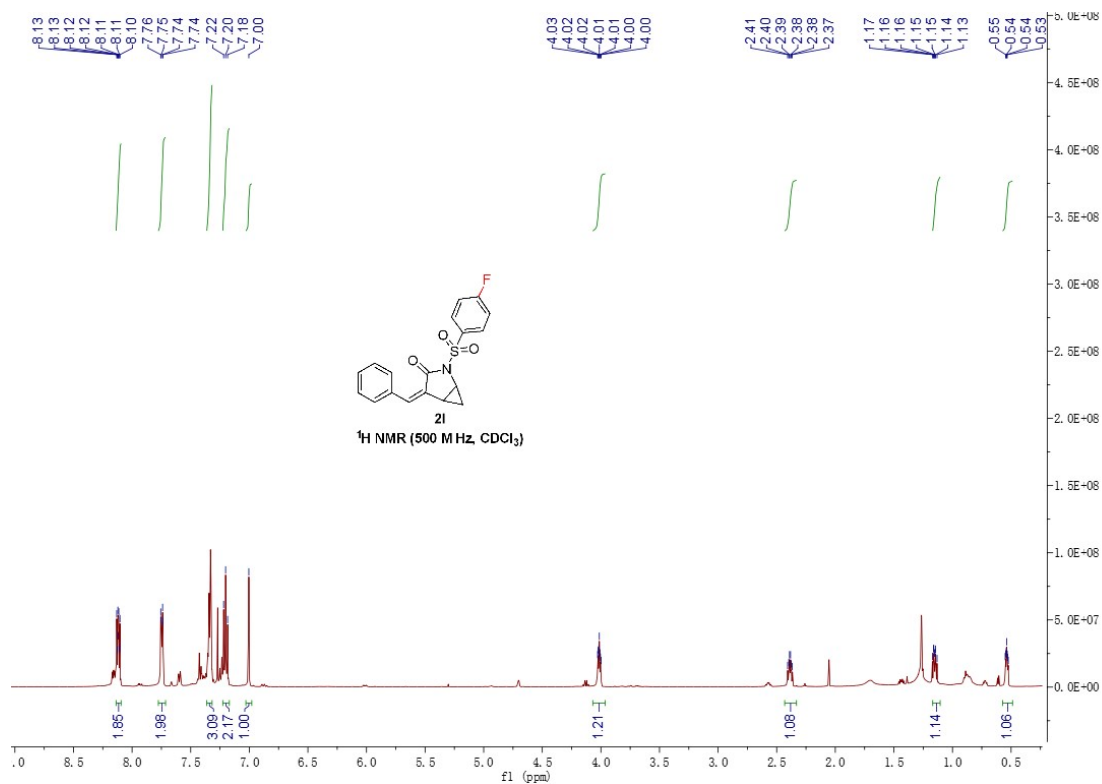

Figure S74. <sup>1</sup>H NMR (500 MHz, CDCl<sub>3</sub>) spectrum of **2l**

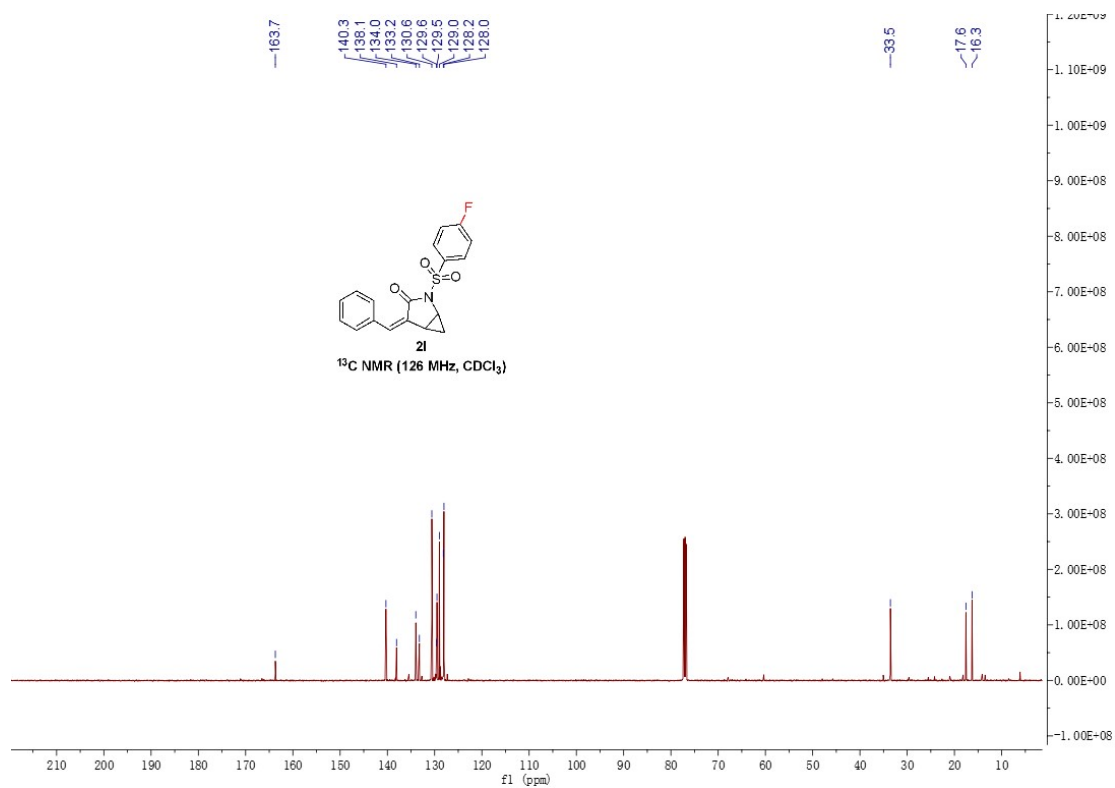

Figure S75. <sup>13</sup>C NMR (126 MHz, CDCl<sub>3</sub>) spectrum of **2l**

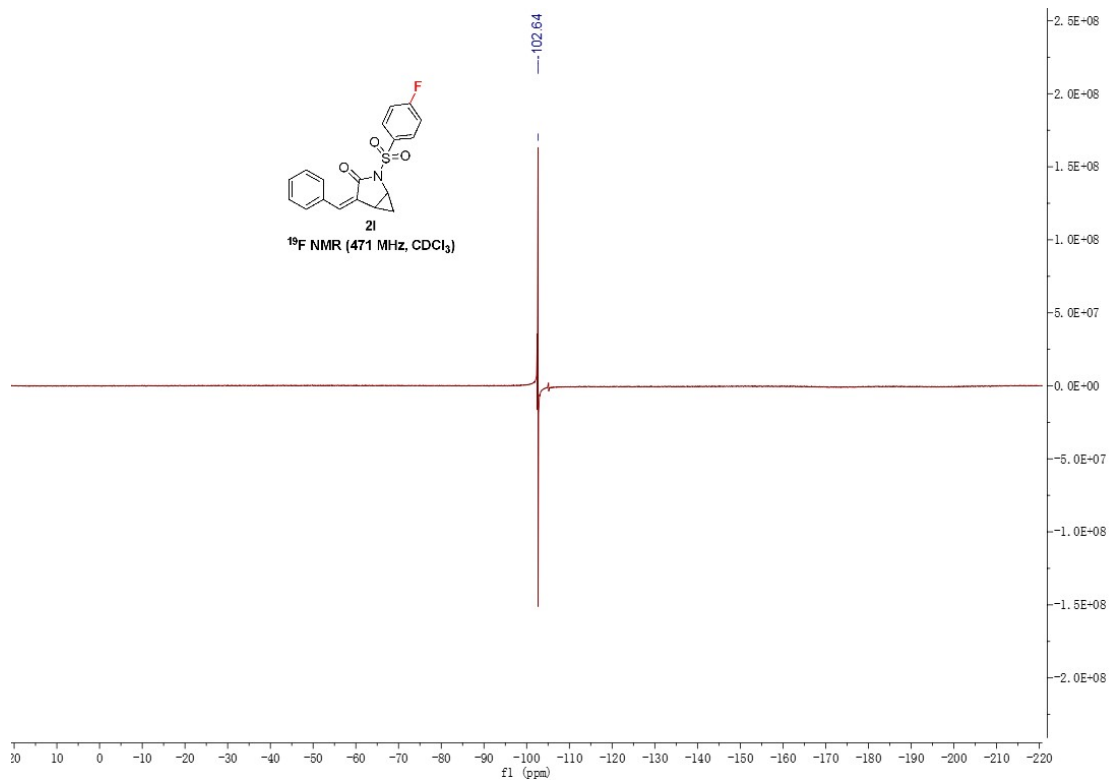

**Figure S76.** <sup>19</sup>F NMR (471 MHz, CDCl<sub>3</sub>) spectrum of **2l**

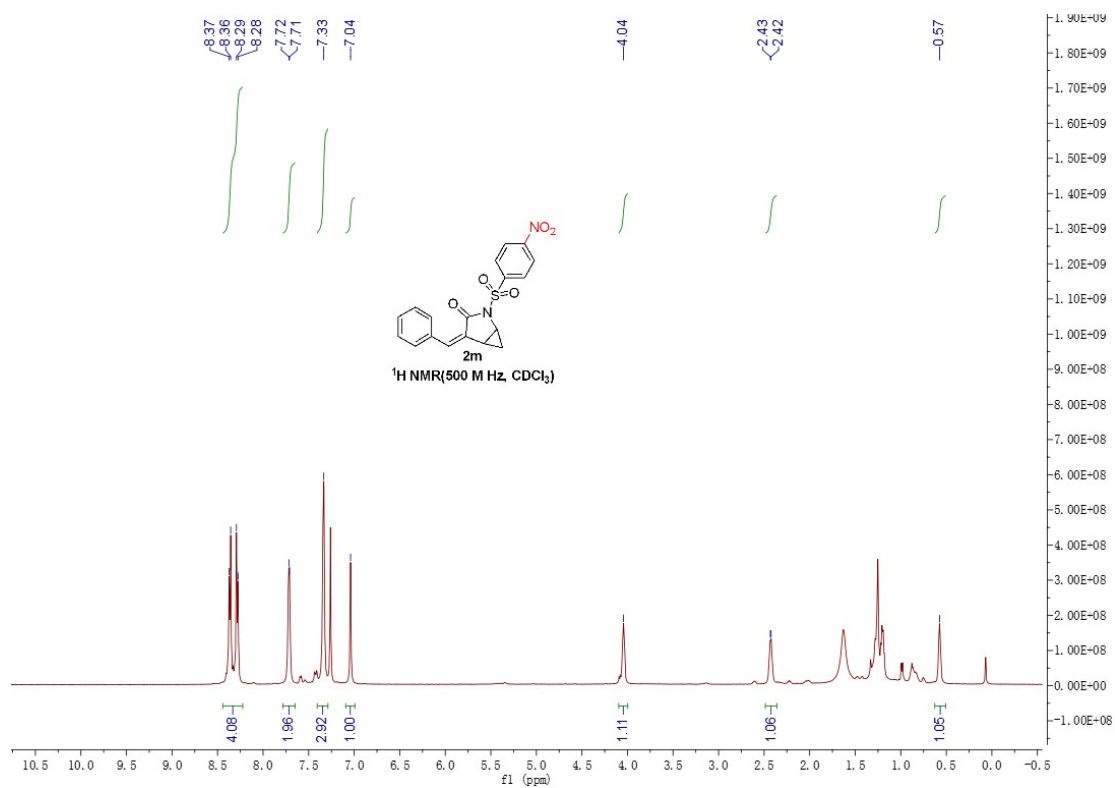

**Figure S77.** <sup>1</sup>H NMR (500 MHz, CDCl<sub>3</sub>) spectrum of **2m**





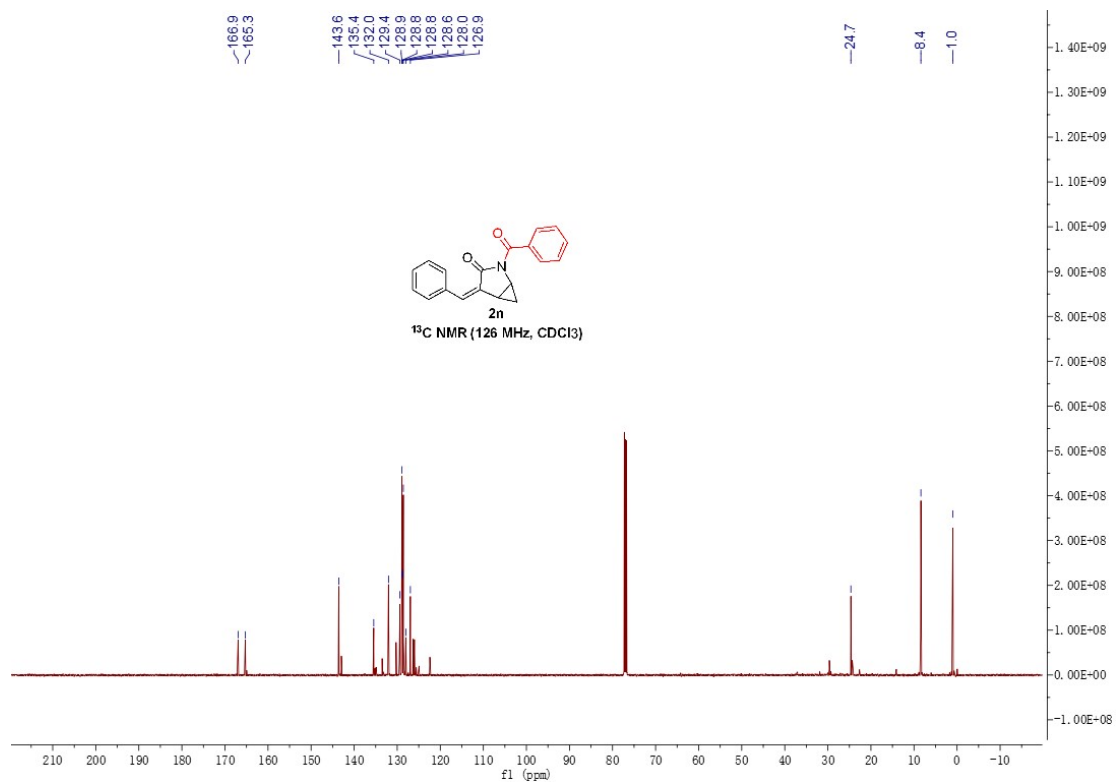

Figure S80. <sup>13</sup>C NMR (126 MHz, CDCl<sub>3</sub>) spectrum of **2n**

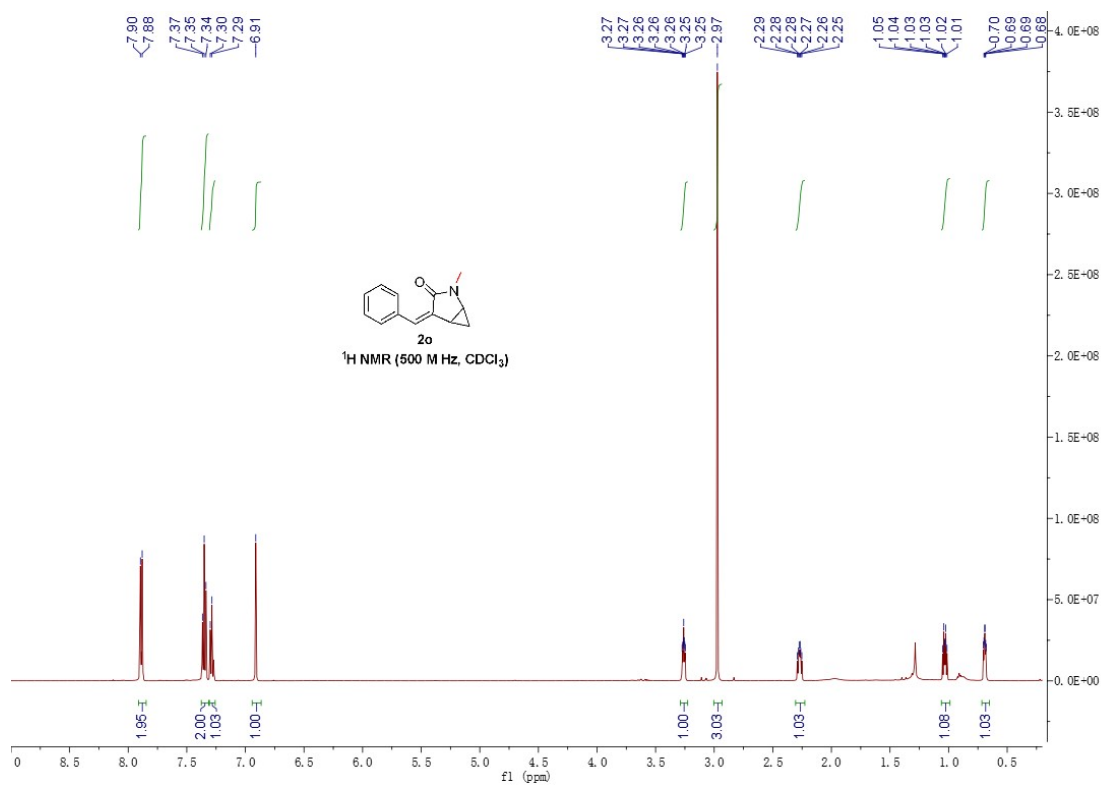

Figure S81. <sup>1</sup>H NMR (500 MHz, CDCl<sub>3</sub>) spectrum of **2o**

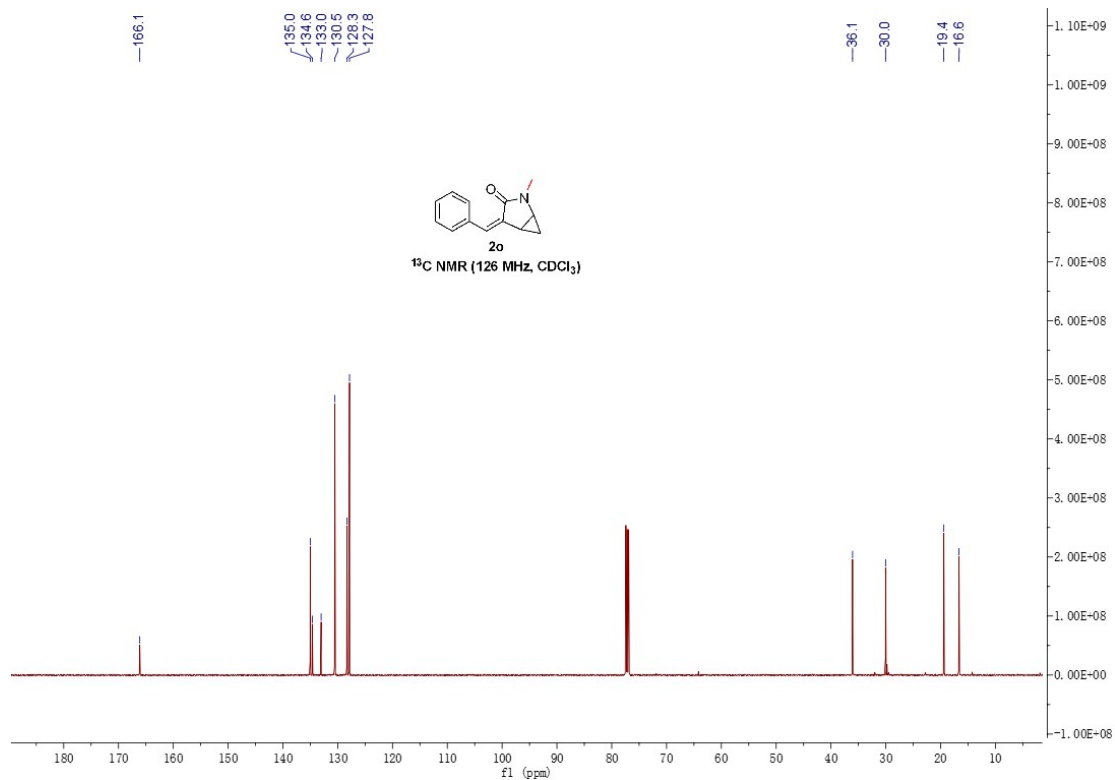

Figure S82.  $^{13}\text{C}$  NMR (126 MHz,  $\text{CDCl}_3$ ) spectrum of **2o**

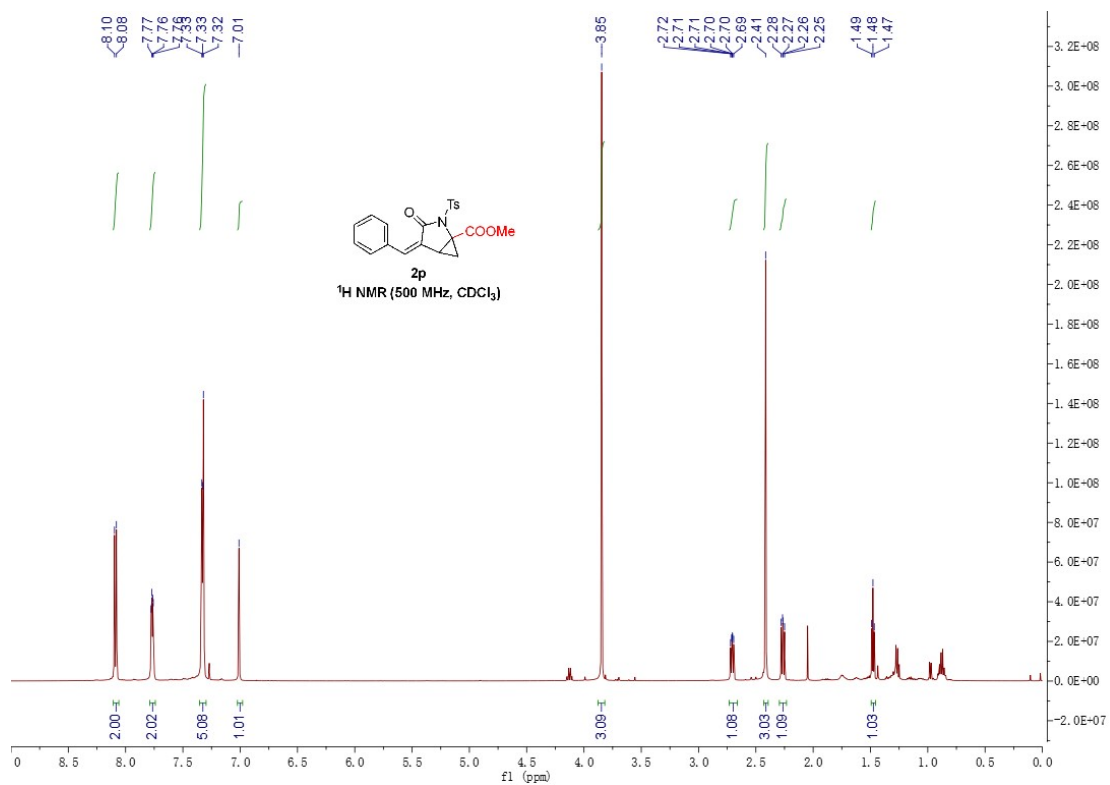

Figure S83.  $^1\text{H}$  NMR (500 MHz,  $\text{CDCl}_3$ ) spectrum of **2r**

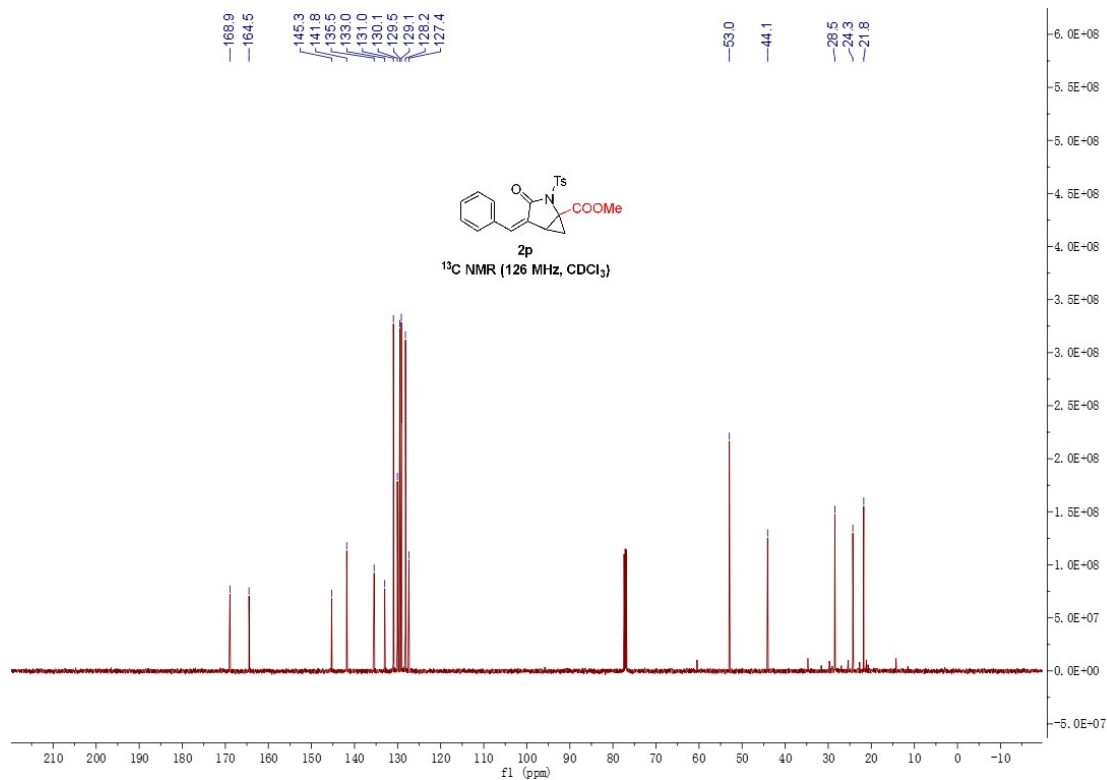

Figure S84.  $^{13}\text{C}$  NMR (126 MHz,  $\text{CDCl}_3$ ) spectrum of 2p

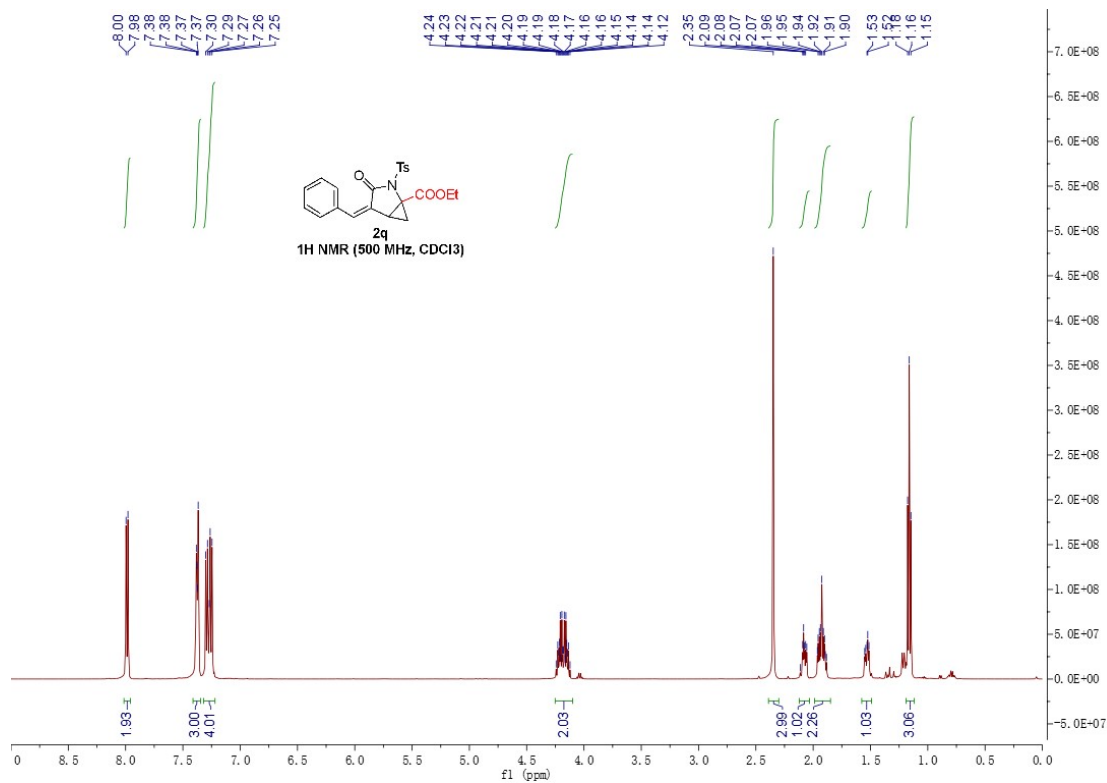

Figure S85.  $^1\text{H}$  NMR (500 MHz,  $\text{CDCl}_3$ ) spectrum of 2q

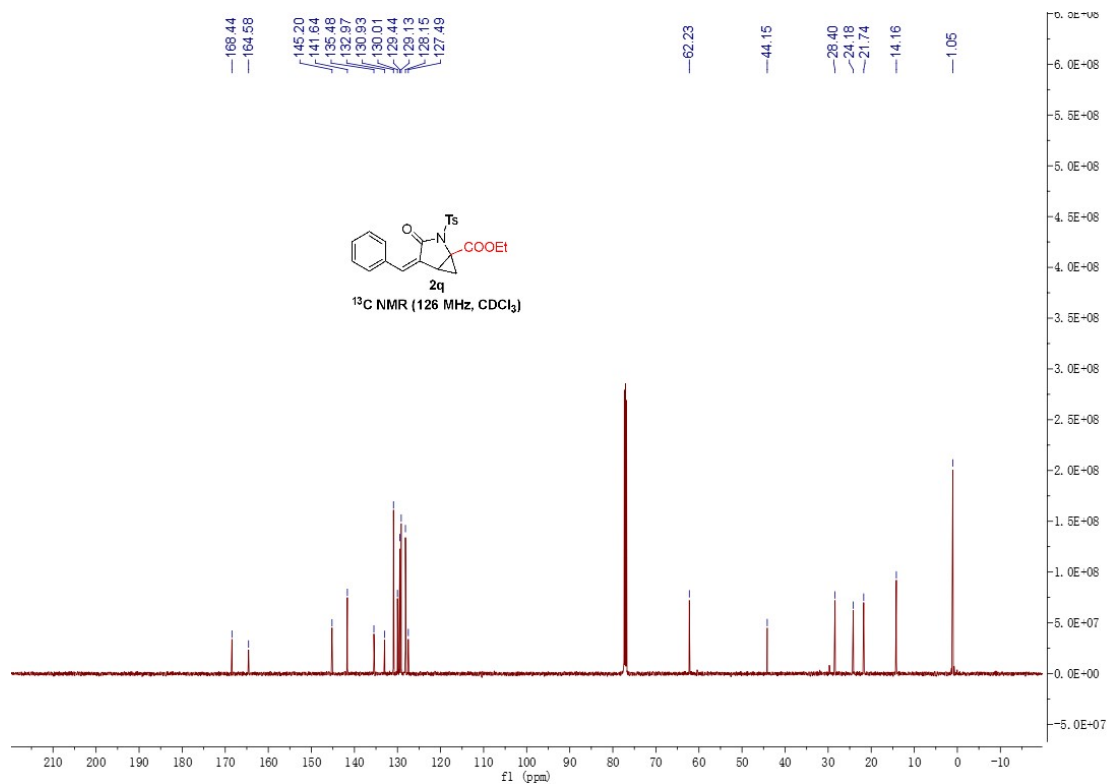

Figure S86.  $^{13}\text{C}$  NMR (126 MHz,  $\text{CDCl}_3$ ) spectrum of 2q

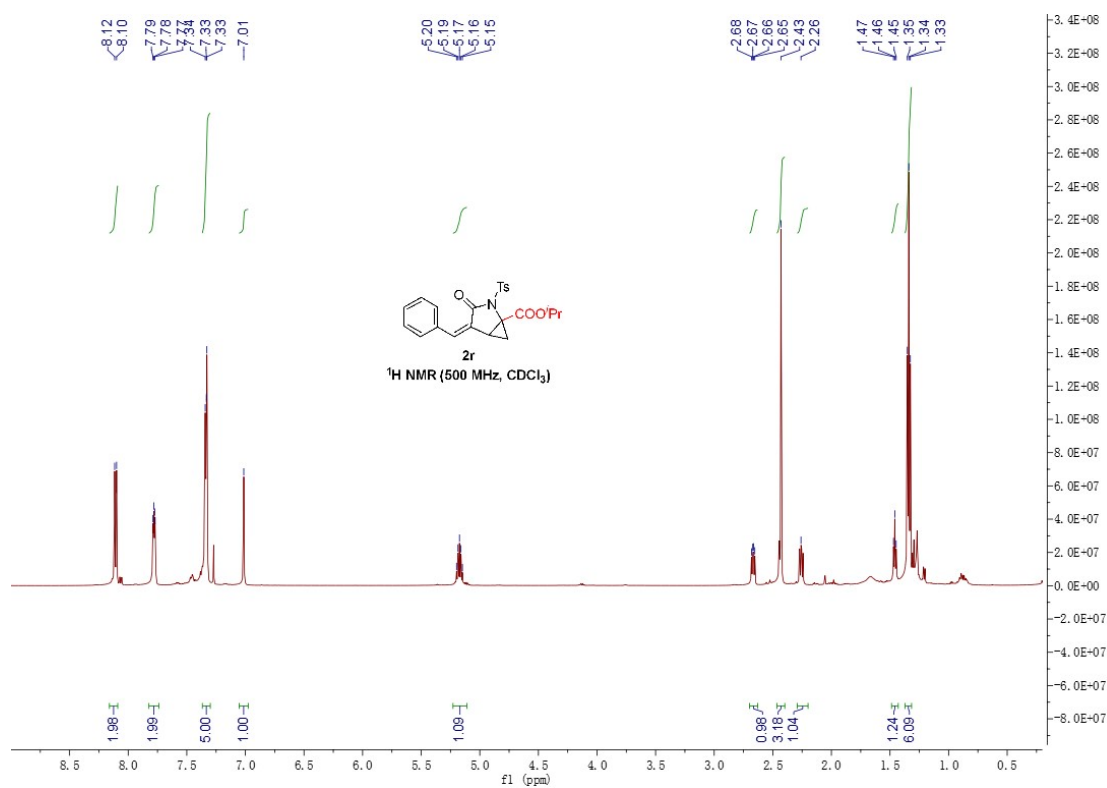

Figure S87.  $^1\text{H}$  NMR (500 MHz,  $\text{CDCl}_3$ ) spectrum of 2r

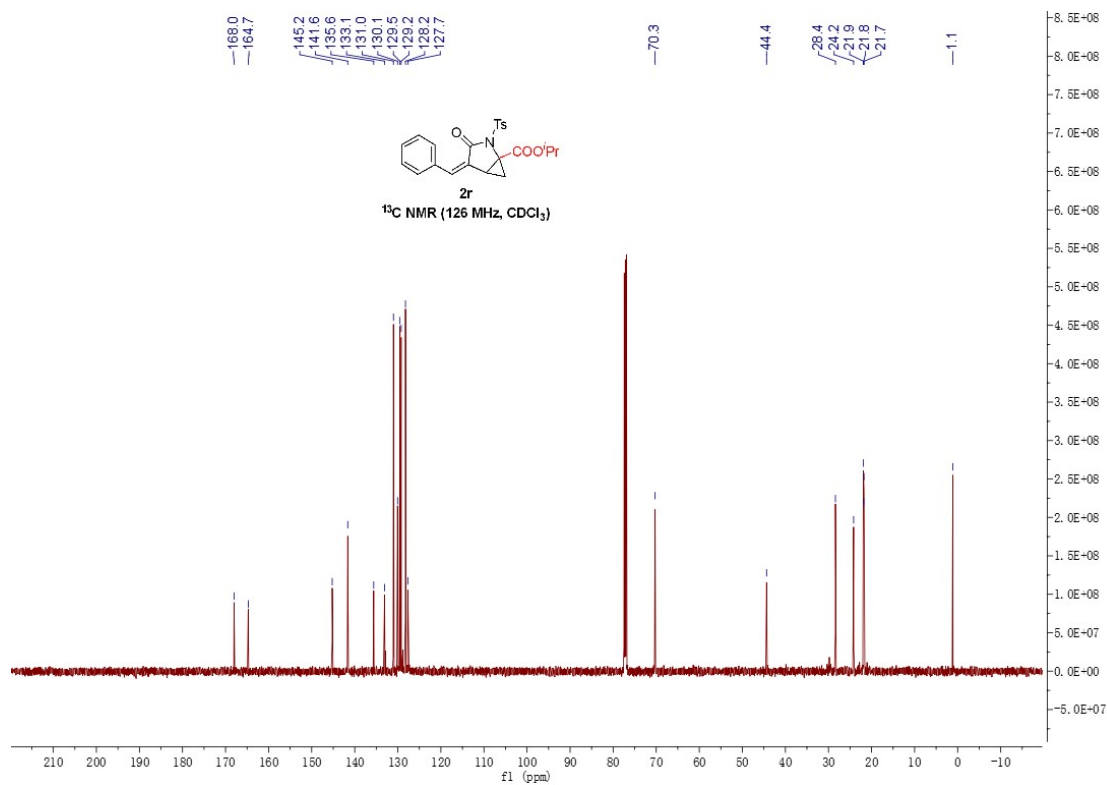

Figure S88. <sup>13</sup>C NMR (126 MHz, CDCl<sub>3</sub>) spectrum of **2r**

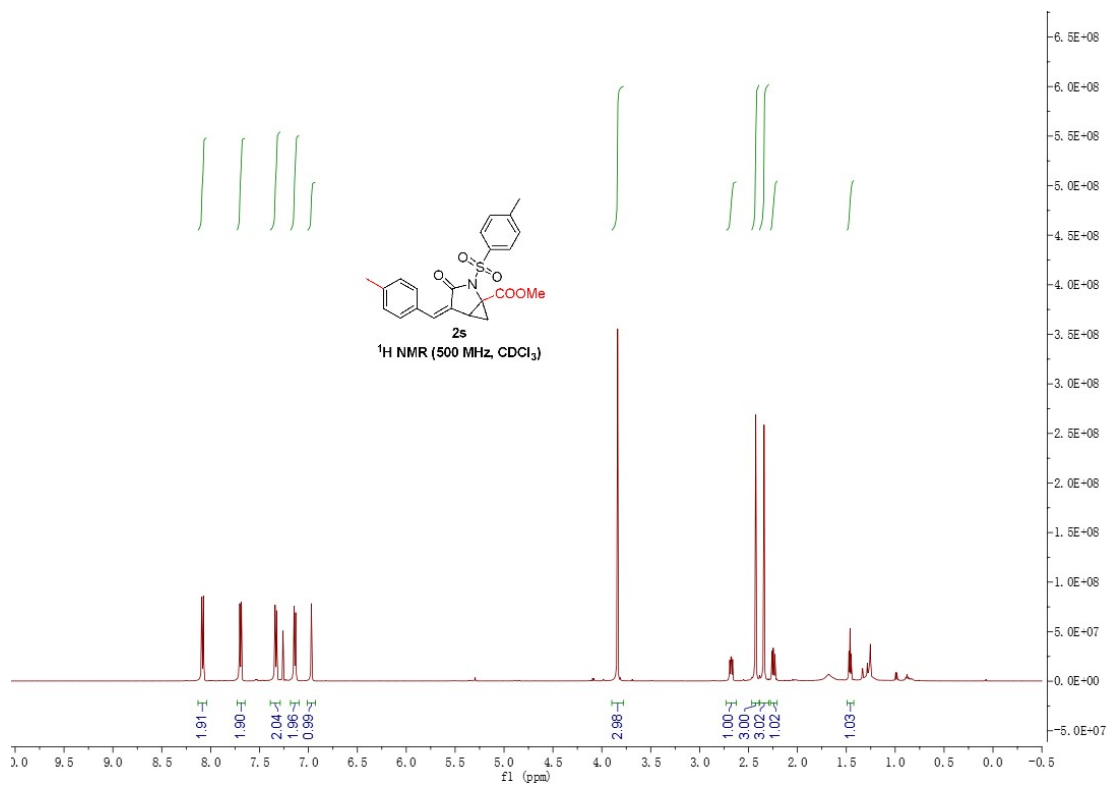

Figure S89. <sup>1</sup>H NMR (500 MHz, CDCl<sub>3</sub>) spectrum of **2s**

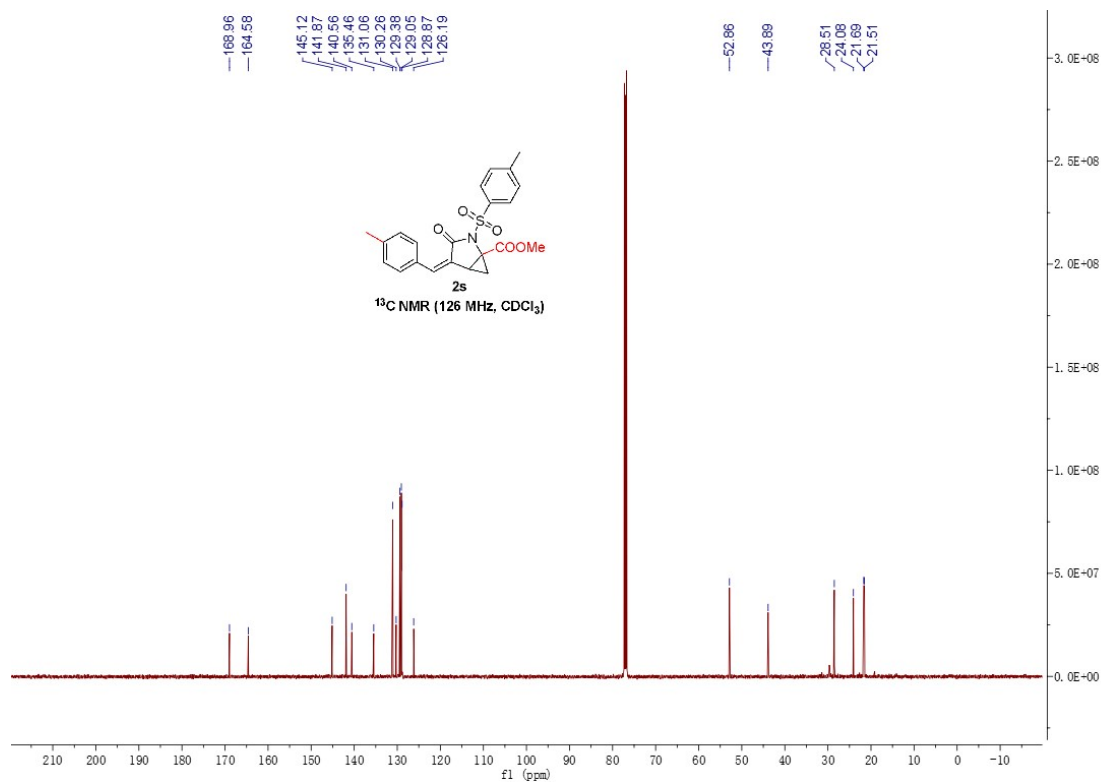

Figure S90. <sup>13</sup>C NMR (126 MHz, CDCl<sub>3</sub>) spectrum of **2s**

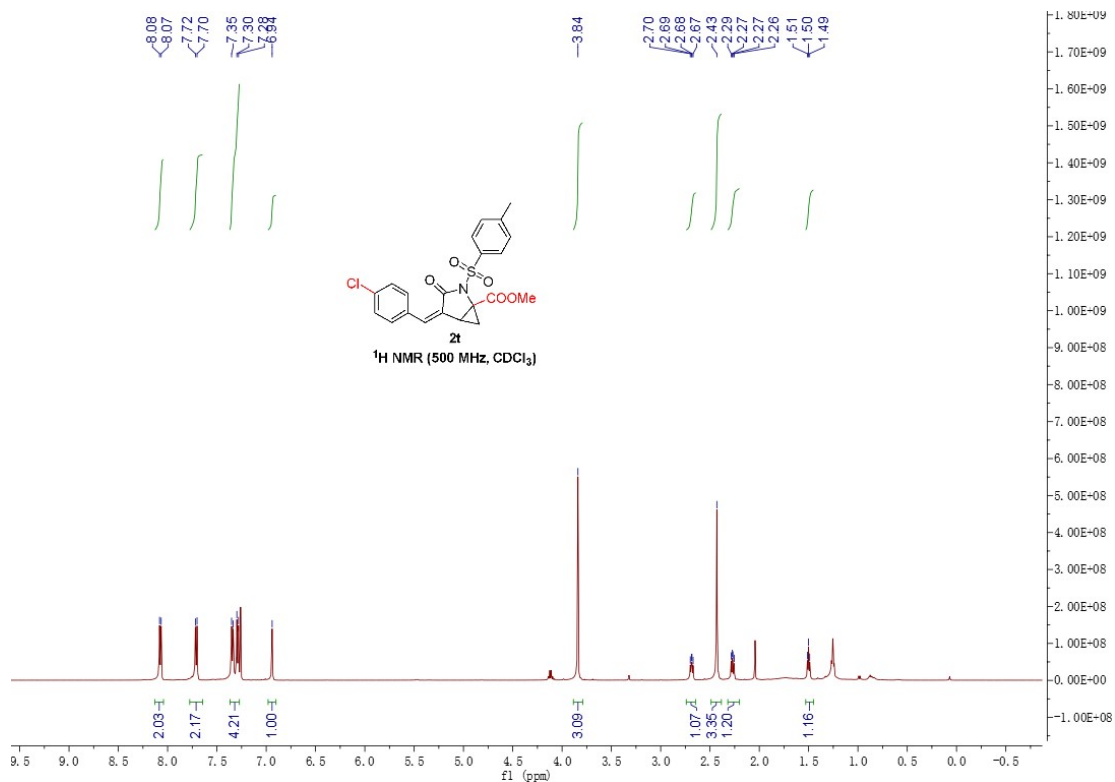

Figure S91. <sup>1</sup>H NMR (500 MHz, CDCl<sub>3</sub>) spectrum of **2s**

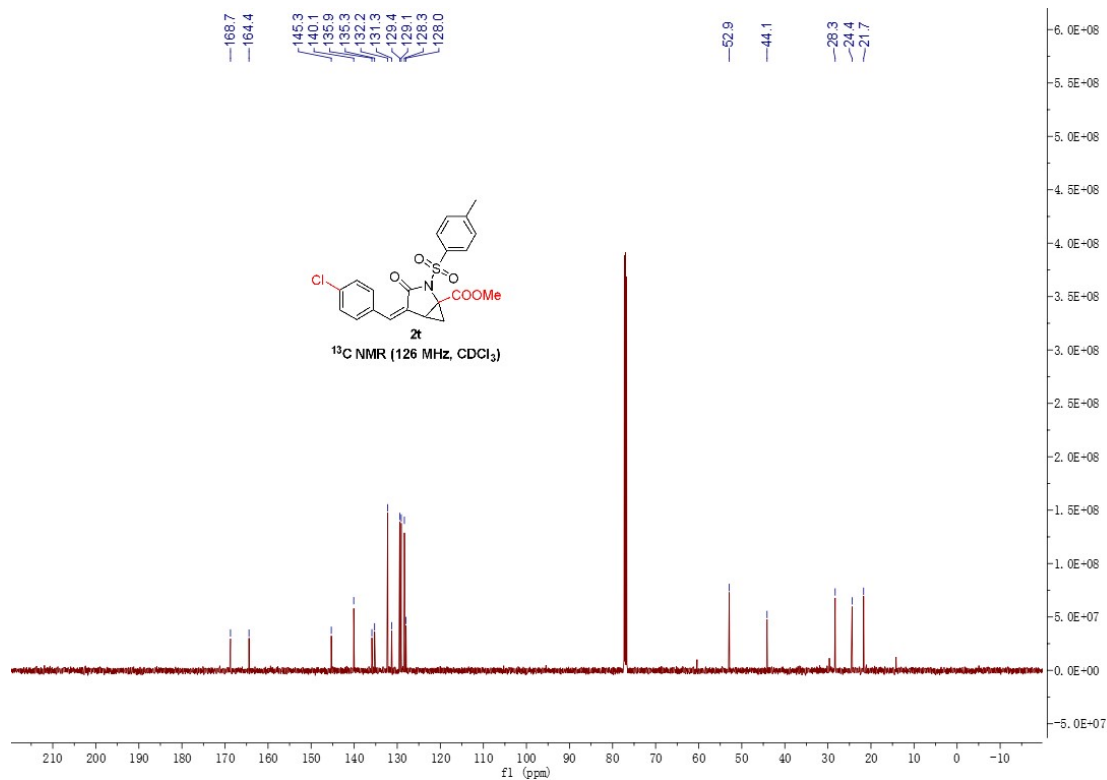

Figure S92. <sup>13</sup>C NMR (126 MHz, CDCl<sub>3</sub>) spectrum of **2s**

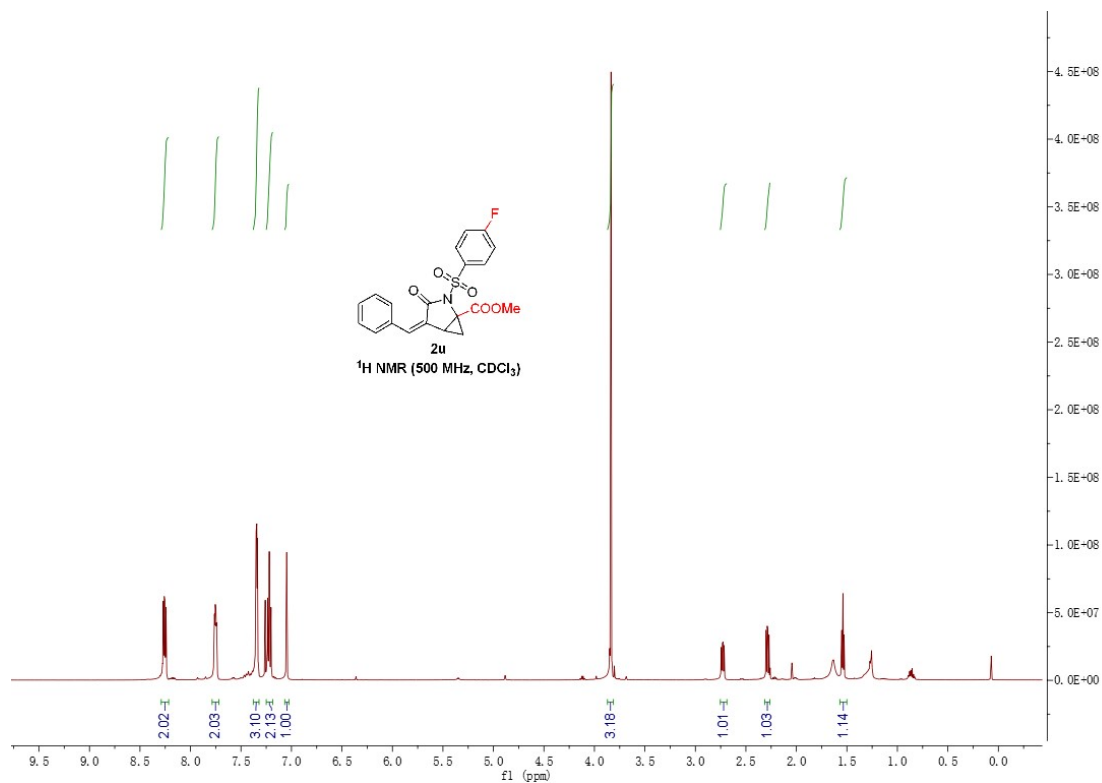

Figure S93. <sup>1</sup>H NMR (500 MHz, CDCl<sub>3</sub>) spectrum of **2u**



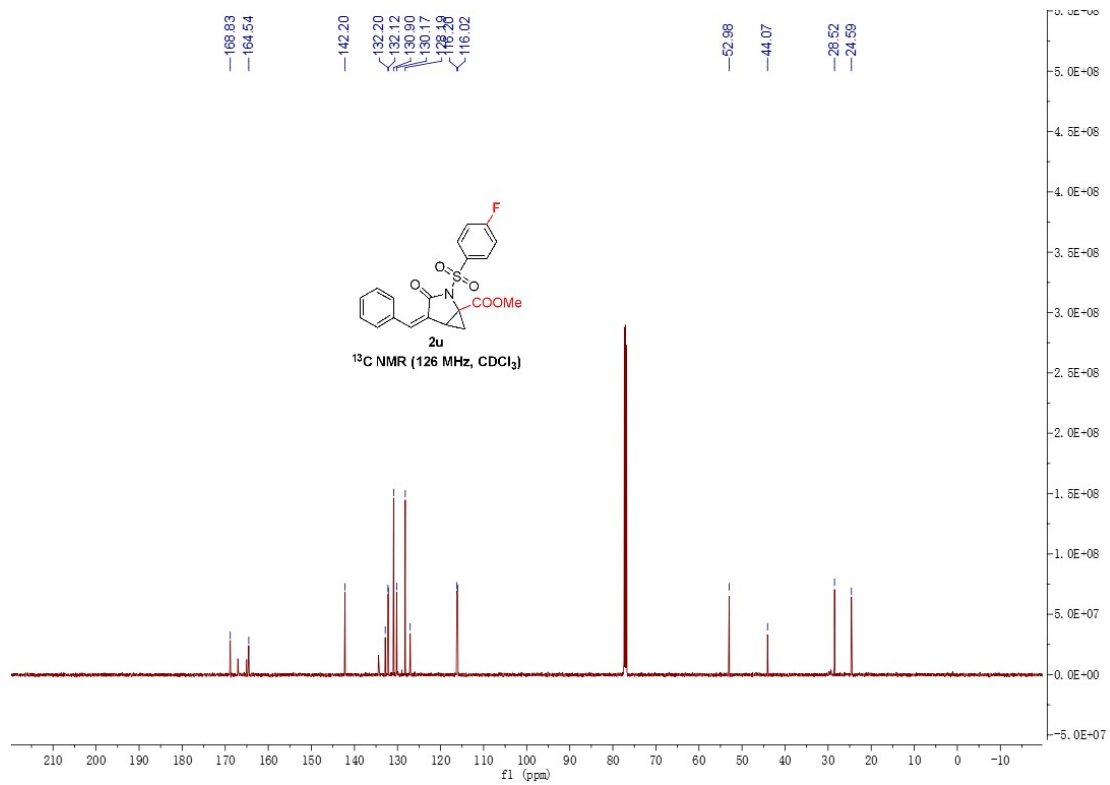

Figure S94. <sup>13</sup>C NMR (126 MHz, CDCl<sub>3</sub>) spectrum of **2u**

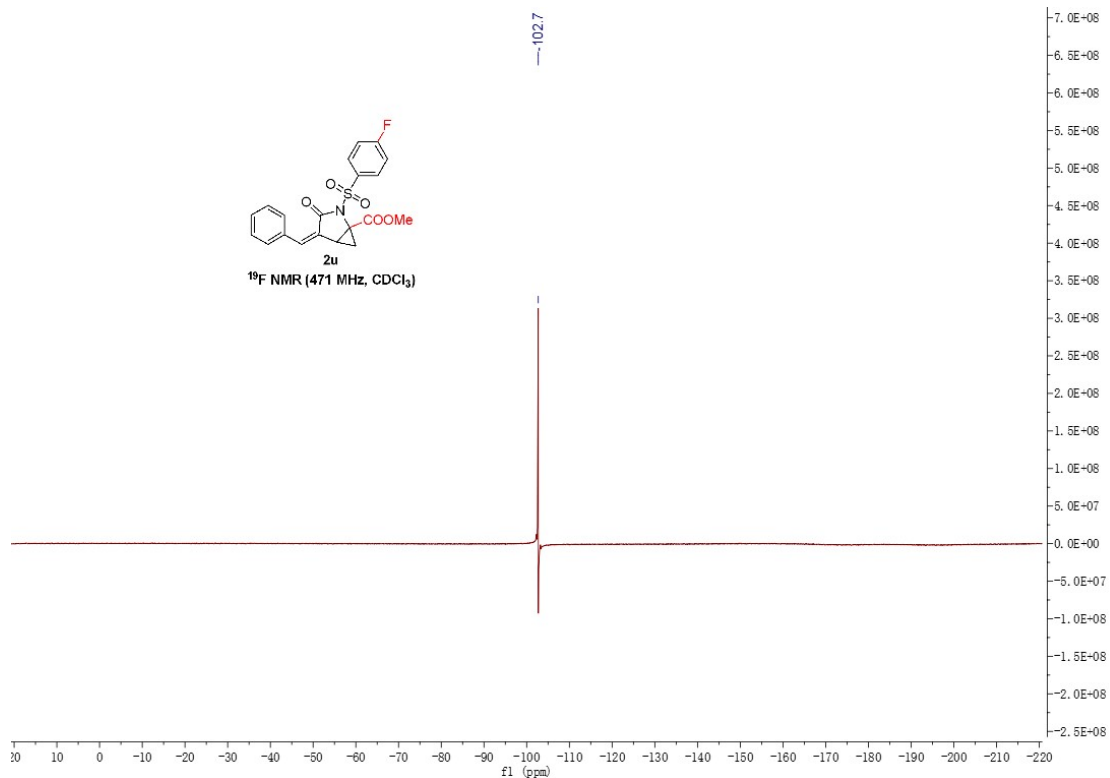

Figure S95. <sup>19</sup>F NMR (471 MHz, CDCl<sub>3</sub>) spectrum of **2u**

**SAMPLE INFORMATION**

|                   |                    |                  |                        |
|-------------------|--------------------|------------------|------------------------|
| Sample Name:      | LHZ-MO-W IA 10VS90 | Acquired By:     | Breeze                 |
| Sample Type:      | 未知                 | Date Acquired:   | 2023/4/24 10:05:10 CST |
| Vial:             | 1:A,1              | Acq. Method:     | iPr vs Hex 10vs90      |
| Injection #:      | 1                  | Date Processed:  | 2023/4/24 11:02:43 CST |
| Injection Volume: | 5.00 ul            | Channel Name:    | 318.9 纳米               |
| Run Time:         | 60.00 Minutes      | Channel Desc.:   | 2998 (210-400)纳米       |
| Column Type:      |                    | Sample Set Name: | ASDF                   |

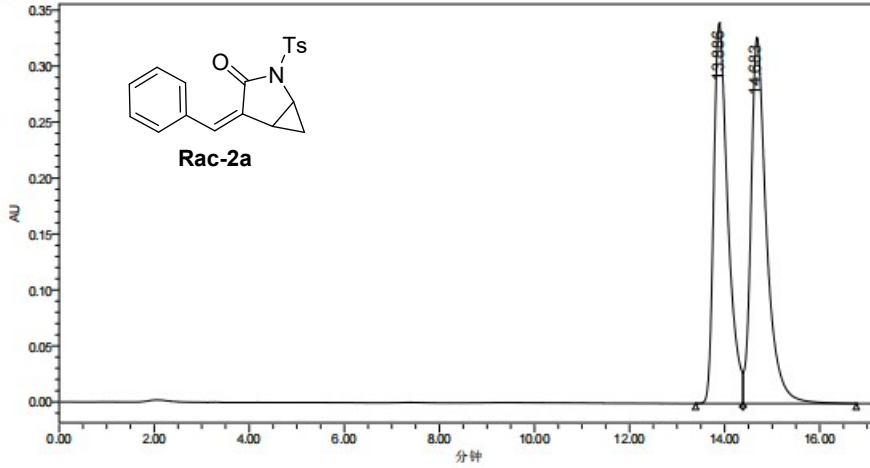

|   | RT (min) | Area (峰*sec) | % Area | Height (峰) | % Height |
|---|----------|--------------|--------|------------|----------|
| 1 | 13.886   | 6992778      | 48.48  | 339889     | 50.95    |
| 2 | 14.683   | 7432494      | 51.52  | 327213     | 49.05    |

**SAMPLE INFORMATION**

|                   |                    |                  |                        |
|-------------------|--------------------|------------------|------------------------|
| Sample Name:      | LHZ-MO-S IA 10VS90 | Acquired By:     | Breeze                 |
| Sample Type:      | 未知                 | Date Acquired:   | 2023/4/24 9:46:21 CST  |
| Vial:             | 1:A,2              | Acq. Method:     | iPr vs Hex 10vs90      |
| Injection #:      | 1                  | Date Processed:  | 2023/4/24 10:22:06 CST |
| Injection Volume: | 5.00 ul            | Channel Name:    | 292.5 纳米               |
| Run Time:         | 60.00 Minutes      | Channel Desc.:   | 2998 (210-400)纳米       |
| Column Type:      |                    | Sample Set Name: | 156                    |

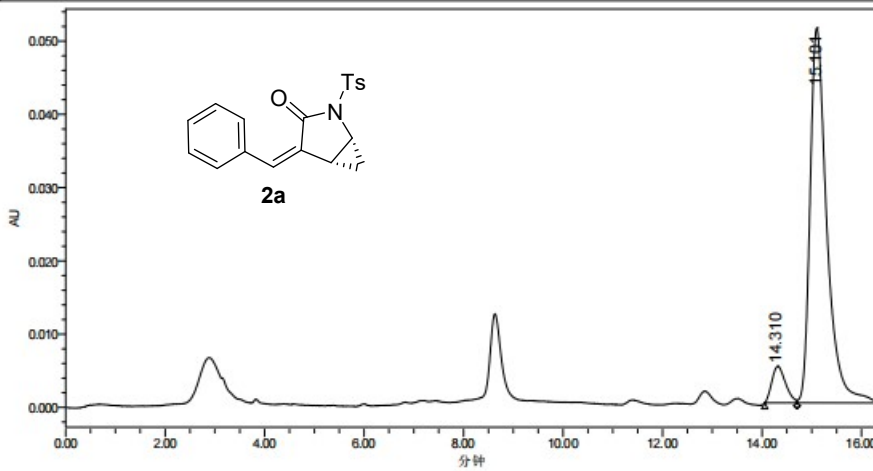

|   | RT (min) | Area (峰*sec) | % Area | Height (峰) | % Height |
|---|----------|--------------|--------|------------|----------|
| 1 | 14.310   | 95078        | 7.35   | 4982       | 8.87     |
| 2 | 15.101   | 1197937      | 92.65  | 51178      | 91.13    |

**SAMPLE INFORMATION**

|                   |                      |                 |                        |
|-------------------|----------------------|-----------------|------------------------|
| Sample Name:      | LHZ-4-Me-W IA 20VS80 | Acquired By:    | Breeze                 |
| Sample Type:      | 未知                   | Date Acquired:  | 2023/4/19 16:20:56 CST |
| Vial:             | 1:A,2                | Acq. Method:    | iPr vs Hex 20vs80      |
| Injection #:      | 1                    | Date Processed: | 2023/4/24 11:31:04 CST |
| Injection Volume: | 5.00 ul              | Channel Name:   | 290.8 纳米               |
| Run Time:         | 60.00 Minutes        | Channel Desc.:  | 2998 (210-400)纳米       |
| Column Type:      |                      | Sample Set Name | 4511                   |

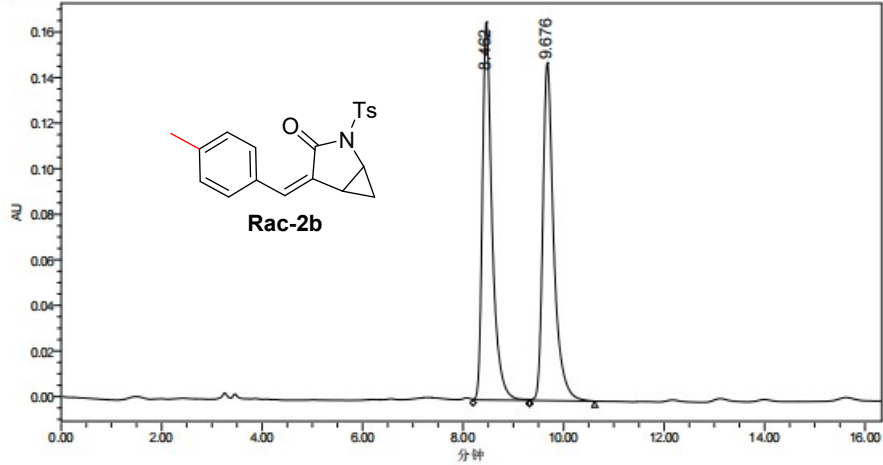

|   | RT (min) | Area (峰*sec) | % Area | Height (峰) | % Height |
|---|----------|--------------|--------|------------|----------|
| 1 | 8.462    | 2225348      | 49.79  | 165772     | 52.79    |
| 2 | 9.676    | 2244410      | 50.21  | 148260     | 47.21    |

**SAMPLE INFORMATION**

|                   |                      |                 |                        |
|-------------------|----------------------|-----------------|------------------------|
| Sample Name:      | LHZ-4-Me-S IA 20VS80 | Acquired By:    | Breeze                 |
| Sample Type:      | 未知                   | Date Acquired:  | 2023/4/19 15:53:53 CST |
| Vial:             | 1:A,1                | Acq. Method:    | iPr vs Hex 20vs80      |
| Injection #:      | 1                    | Date Processed: | 2023/4/24 11:30:40 CST |
| Injection Volume: | 5.00 ul              | Channel Name:   | 290.8 纳米               |
| Run Time:         | 60.00 Minutes        | Channel Desc.:  | 2998 (210-400)纳米       |
| Column Type:      |                      | Sample Set Name | ASDF                   |

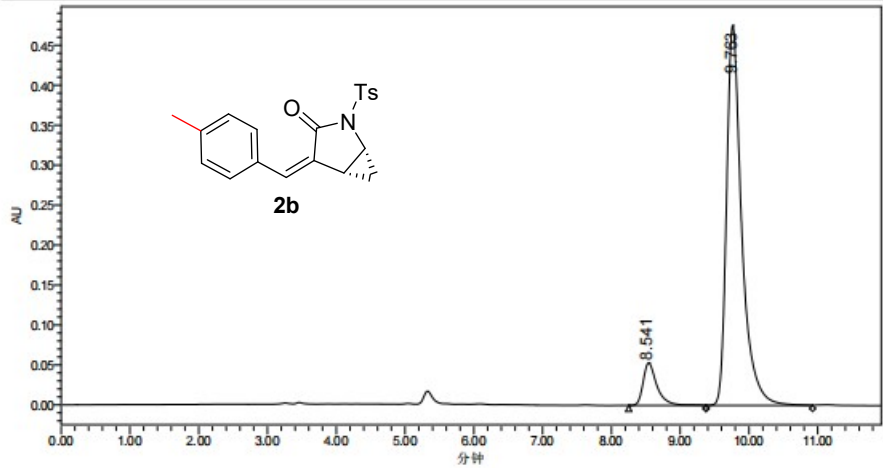

|   | RT (min) | Area (峰*sec) | % Area | Height (峰) | % Height |
|---|----------|--------------|--------|------------|----------|
| 1 | 8.541    | 747748       | 9.30   | 53226      | 10.07    |
| 2 | 9.763    | 7288335      | 90.70  | 475290     | 89.93    |

**SAMPLE INFORMATION**

|                   |                      |                  |                        |
|-------------------|----------------------|------------------|------------------------|
| Sample Name:      | LHZ-3-ME-W IA 10VS90 | Acquired By:     | Breeze                 |
| Sample Type:      | 未知                   | Date Acquired:   | 2023/4/24 10:23:24 CST |
| Vial:             | 1:A,1                | Acq. Method:     | iPrvs Hex 10vs90       |
| Injection #:      | 1                    | Date Processed:  | 2023/4/24 11:03:17 CST |
| Injection Volume: | 5.00 ul              | Channel Name:    | 318.9 纳米               |
| Run Time:         | 60.00 Minutes        | Channel Desc.:   | 2998 (210-400)纳米       |
| Column Type:      |                      | Sample Set Name: | ASDF                   |

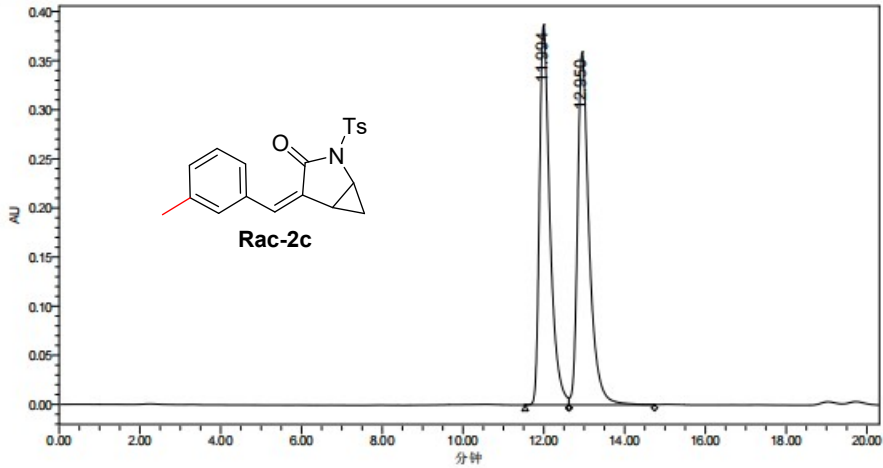

|   | RT (min) | Area (碱*sec) | % Area | Height (碱) | % Height |
|---|----------|--------------|--------|------------|----------|
| 1 | 11.994   | 6955634      | 49.23  | 386880     | 51.86    |
| 2 | 12.950   | 7174121      | 50.77  | 359128     | 48.14    |

**SAMPLE INFORMATION**

|                   |                      |                  |                        |
|-------------------|----------------------|------------------|------------------------|
| Sample Name:      | LHZ-3-ME-S IA 10VS90 | Acquired By:     | Breeze                 |
| Sample Type:      | 未知                   | Date Acquired:   | 2023/4/24 10:44:25 CST |
| Vial:             | 1:A,2                | Acq. Method:     | iPrvs Hex 10vs90       |
| Injection #:      | 1                    | Date Processed:  | 2023/4/24 11:03:38 CST |
| Injection Volume: | 5.00 ul              | Channel Name:    | 318.9 纳米               |
| Run Time:         | 60.00 Minutes        | Channel Desc.:   | 2998 (210-400)纳米       |
| Column Type:      |                      | Sample Set Name: | 15341                  |

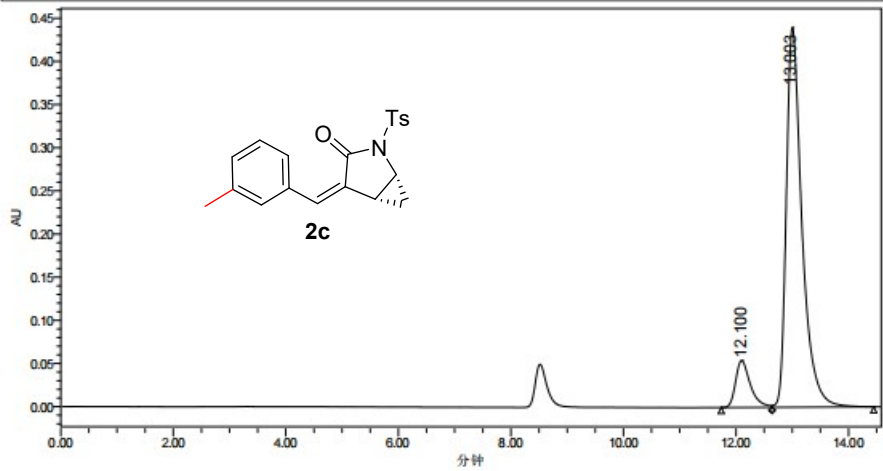

|   | RT (min) | Area (碱*sec) | % Area | Height (碱) | % Height |
|---|----------|--------------|--------|------------|----------|
| 1 | 12.100   | 988840       | 10.42  | 54486      | 11.02    |
| 2 | 13.003   | 8504302      | 89.58  | 440059     | 88.98    |

### SAMPLE INFORMATION

|                              |                                        |                                      |
|------------------------------|----------------------------------------|--------------------------------------|
| Sample Name: LHZ-ET-W 10VS90 | Acquired By: Breeze                    | Date Acquired: 2023/3/15 9:03:50 CST |
| Sample Type: 未知              | Date Acquired: 2023/3/15 9:03:50 CST   | Acq. Method: iPr vs Hex 10vs90       |
| Vial: 1:A,1                  | Date Processed: 2023/4/12 19:56:13 CST | Channel Name: 318.9 纳米               |
| Injection #: 1               | Channel Desc.: 2998 (210-400)纳米        | Sample Set Name: 419156              |
| Injection Volume: 5.00 ul    |                                        |                                      |
| Run Time: 30.00 Minutes      |                                        |                                      |
| Column Type:                 |                                        |                                      |

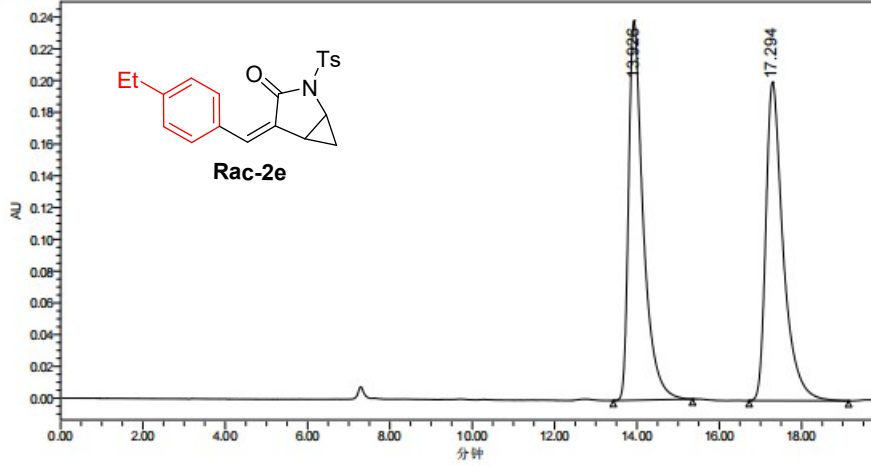

|   | RT (min) | Area (碱*sec) | % Area | Height (碱) | % Height |
|---|----------|--------------|--------|------------|----------|
| 1 | 13.926   | 5875828      | 49.99  | 238984     | 54.36    |
| 2 | 17.294   | 5877067      | 50.01  | 200662     | 45.64    |

### SAMPLE INFORMATION

|                               |                                        |                                      |
|-------------------------------|----------------------------------------|--------------------------------------|
| Sample Name: LHZ-ET IA 10VS90 | Acquired By: Breeze                    | Date Acquired: 2023/3/15 9:26:06 CST |
| Sample Type: 未知               | Date Acquired: 2023/3/15 9:26:06 CST   | Acq. Method: iPr vs Hex 10vs90       |
| Vial: 1:A,2                   | Date Processed: 2023/4/12 19:55:42 CST | Channel Name: 318.9 纳米               |
| Injection #: 1                | Channel Desc.: 2998 (210-400)纳米        | Sample Set Name: 4516345             |
| Injection Volume: 5.00 ul     |                                        |                                      |
| Run Time: 30.00 Minutes       |                                        |                                      |
| Column Type:                  |                                        |                                      |

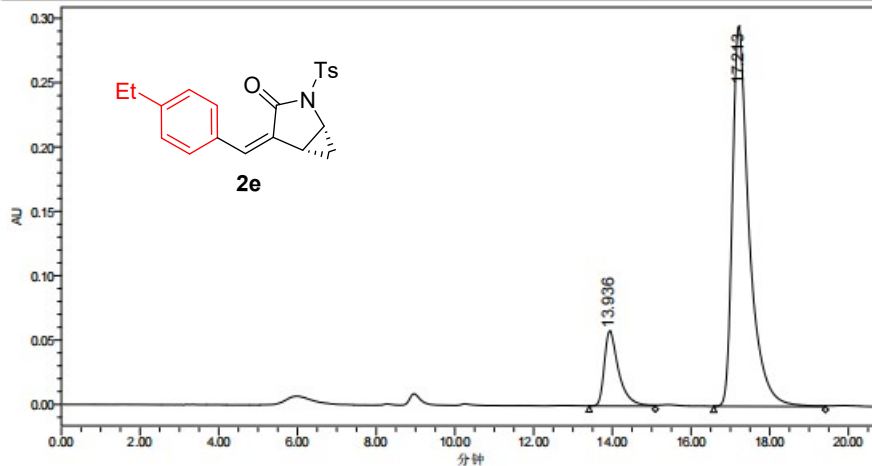

|   | RT (min) | Area (碱*sec) | % Area | Height (碱) | % Height |
|---|----------|--------------|--------|------------|----------|
| 1 | 13.936   | 1479954      | 14.47  | 58165      | 16.46    |
| 2 | 17.213   | 8747299      | 85.53  | 295254     | 83.54    |

### SAMPLE INFORMATION

|                                 |                                        |
|---------------------------------|----------------------------------------|
| Sample Name: LHZ-4-F-WIC 20VS80 | Acquired By: Breeze                    |
| Sample Type: 未知                 | Date Acquired: 2023/3/17 15:44:37 CST  |
| Vial: 1:A,1                     | Acq. Method: iPr vs Hex 20vs80         |
| Injection #: 1                  | Date Processed: 2023/4/12 19:50:06 CST |
| Injection Volume: 5.00 ul       | Channel Name: 290.8 纳米                 |
| Run Time: 120.00 Minutes        | Channel Desc.: 2998 (210-400)纳米        |
| Column Type:                    | Sample Set Name 64                     |

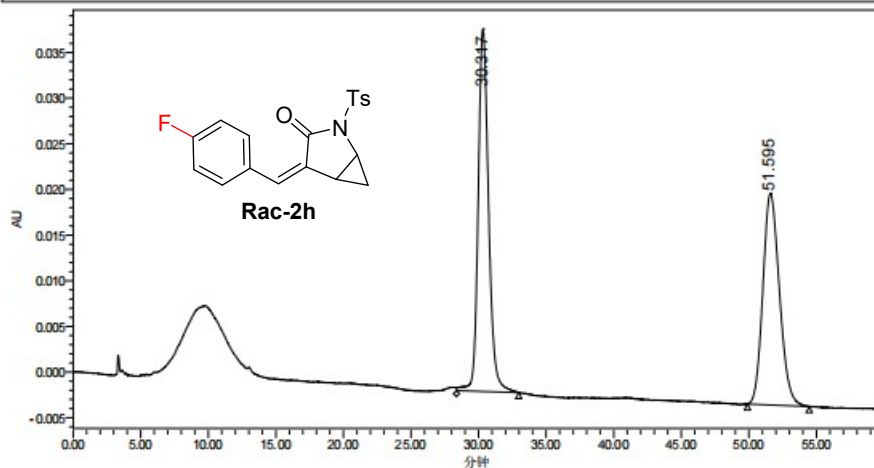

|   | RT (min) | Area (碱*sec) | % Area | Height (碱) | % Height |
|---|----------|--------------|--------|------------|----------|
| 1 | 30.317   | 2121044      | 51.83  | 39684      | 63.12    |
| 2 | 51.595   | 1971592      | 48.17  | 23191      | 36.88    |

### SAMPLE INFORMATION

|                                  |                                        |
|----------------------------------|----------------------------------------|
| Sample Name: LHZ-4-F-S IC 20VS80 | Acquired By: Breeze                    |
| Sample Type: 未知                  | Date Acquired: 2023/3/17 16:47:46 CST  |
| Vial: 1:A,1                      | Acq. Method: iPr vs Hex 20vs80         |
| Injection #: 1                   | Date Processed: 2023/4/12 19:49:12 CST |
| Injection Volume: 5.00 ul        | Channel Name: 290.8 纳米                 |
| Run Time: 120.00 Minutes         | Channel Desc.: 2998 (210-400)纳米        |
| Column Type:                     | Sample Set Name 415341                 |

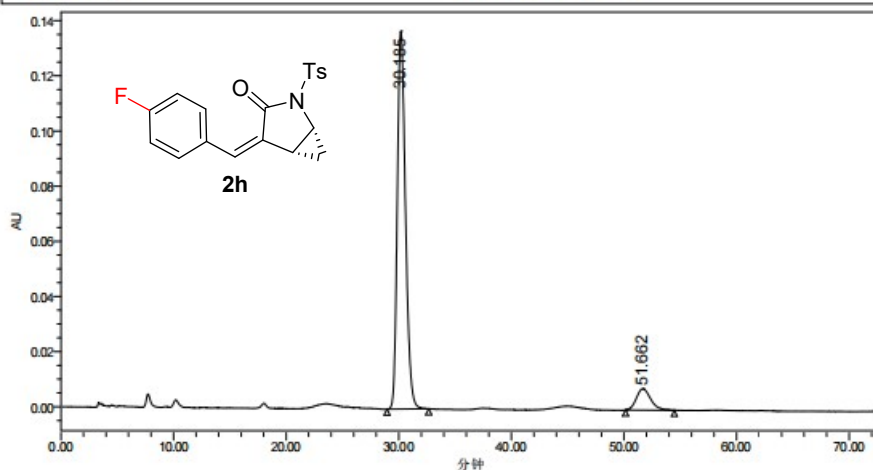

|   | RT (min) | Area (碱*sec) | % Area | Height (碱) | % Height |
|---|----------|--------------|--------|------------|----------|
| 1 | 30.185   | 6908550      | 90.98  | 137045     | 94.65    |
| 2 | 51.662   | 684696       | 9.02   | 7748       | 5.35     |

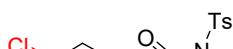

### SAMPLE INFORMATION

|                                |                                |                                        |
|--------------------------------|--------------------------------|----------------------------------------|
| Sample Name: LHZ-CL-WIC 20VS80 | Acquired By: Breeze            | Date Acquired: 2023/3/15 14:29:07 CST  |
| Sample Type: 未知                | Acq. Method: IPr vs Hex 20vs80 | Date Processed: 2023/4/12 19:53:50 CST |
| Vial: 1:A,1                    | Channel Name: 290.8 纳米         | Channel Desc.: 2998 (210-400)纳米        |
| Injection #: 1                 | Sample Set Name: 4534          |                                        |
| Injection Volume: 5.00 ul      |                                |                                        |
| Run Time: 120.00 Minutes       |                                |                                        |
| Column Type:                   |                                |                                        |

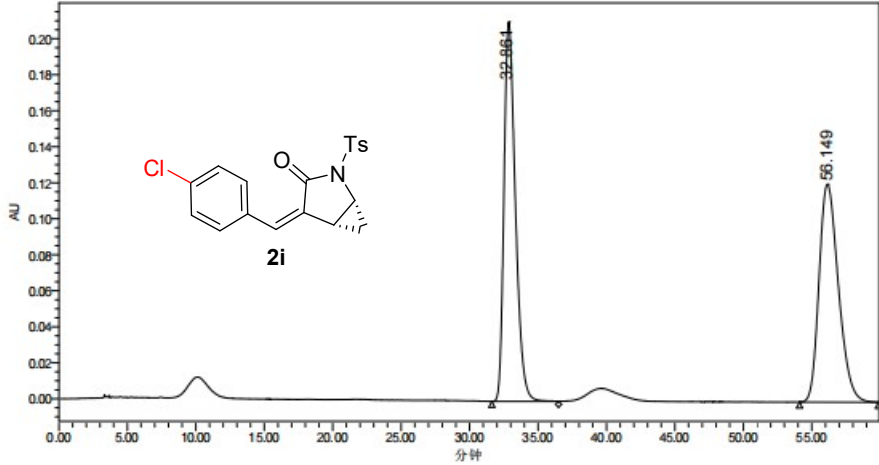

|   | RT (min) | Area (峰*sec) | % Area | Height (峰) | % Height |
|---|----------|--------------|--------|------------|----------|
| 1 | 32.861   | 12166962     | 50.54  | 210725     | 63.52    |
| 2 | 56.149   | 11905673     | 49.46  | 121014     | 36.48    |

### SAMPLE INFORMATION

|                                 |                                |                                        |
|---------------------------------|--------------------------------|----------------------------------------|
| Sample Name: LHZ-CL-S IC 20VS80 | Acquired By: Breeze            | Date Acquired: 2023/3/15 15:45:14 CST  |
| Sample Type: 未知                 | Acq. Method: IPr vs Hex 20vs80 | Date Processed: 2023/4/12 19:54:47 CST |
| Vial: 1:A,1                     | Channel Name: 290.8 纳米         | Channel Desc.: 2998 (210-400)纳米        |
| Injection #: 1                  | Sample Set Name: 1561          |                                        |
| Injection Volume: 5.00 ul       |                                |                                        |
| Run Time: 65.00 Minutes         |                                |                                        |
| Column Type:                    |                                |                                        |

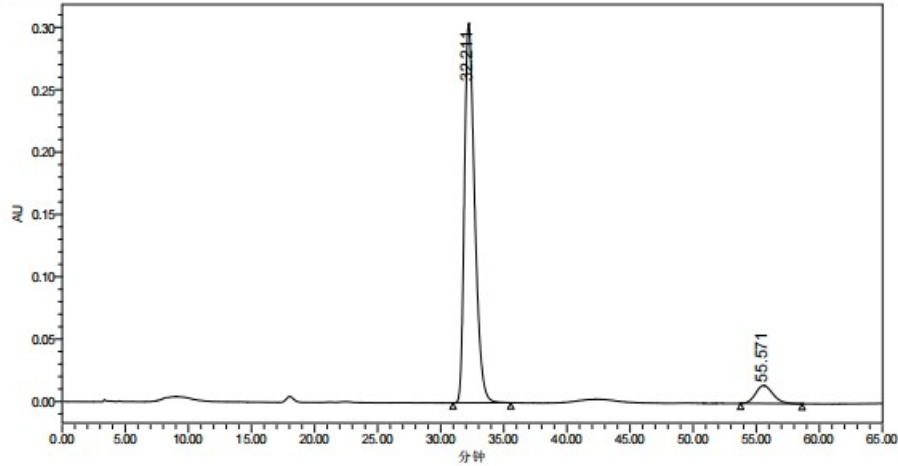

|   | RT (min) | Area (峰*sec) | % Area | Height (峰) | % Height |
|---|----------|--------------|--------|------------|----------|
| 1 | 32.211   | 17177227     | 92.57  | 304197     | 95.47    |
| 2 | 55.571   | 1377977      | 7.43   | 14423      | 4.53     |

**SAMPLE INFORMATION**

|                   |                    |                  |                        |
|-------------------|--------------------|------------------|------------------------|
| Sample Name:      | LHZ-2F-w IC 20VS80 | Acquired By:     | Breeze                 |
| Sample Type:      | 未知                 | Date Acquired:   | 2023/3/15 20:43:59 CST |
| Vial:             | 1:A,1              | Acq. Method:     | iPr vs Hex 20vs80      |
| Injection #:      | 1                  | Date Processed:  | 2023/4/12 19:50:52 CST |
| Injection Volume: | 5.00 ul            | Channel Name:    | 290.8 纳米               |
| Run Time:         | 60.00 Minutes      | Channel Desc.:   | 2998 (210-400)纳米       |
| Column Type:      |                    | Sample Set Name: | 453453                 |

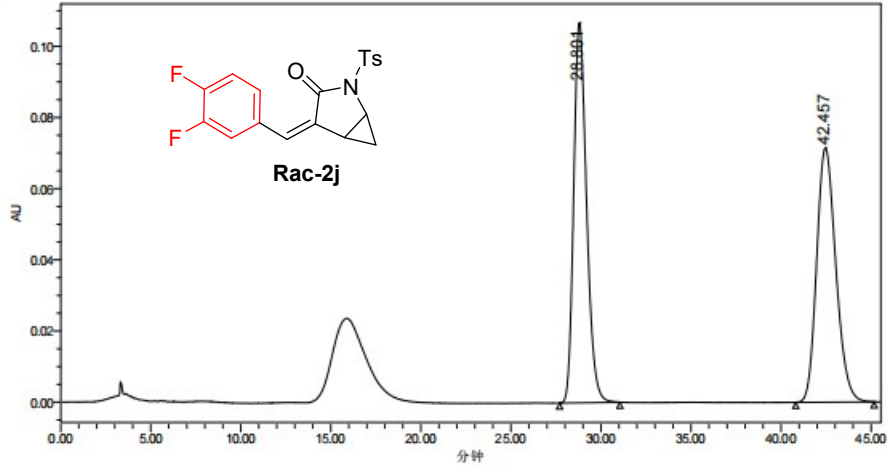

|   | RT (min) | Area (峰*sec) | % Area | Height (峰) | % Height |
|---|----------|--------------|--------|------------|----------|
| 1 | 28.801   | 5290705      | 50.02  | 106790     | 59.91    |
| 2 | 42.457   | 5286732      | 49.98  | 71457      | 40.09    |

**SAMPLE INFORMATION**

|                   |                    |                  |                        |
|-------------------|--------------------|------------------|------------------------|
| Sample Name:      | LHZ-2F-S IC 20VS80 | Acquired By:     | Breeze                 |
| Sample Type:      | 未知                 | Date Acquired:   | 2023/3/15 19:54:50 CST |
| Vial:             | 1:A,1              | Acq. Method:     | iPr vs Hex 20vs80      |
| Injection #:      | 1                  | Date Processed:  | 2023/4/12 19:51:35 CST |
| Injection Volume: | 5.00 ul            | Channel Name:    | 290.8 纳米               |
| Run Time:         | 60.00 Minutes      | Channel Desc.:   | 2998 (210-400)纳米       |
| Column Type:      |                    | Sample Set Name: | 25616                  |

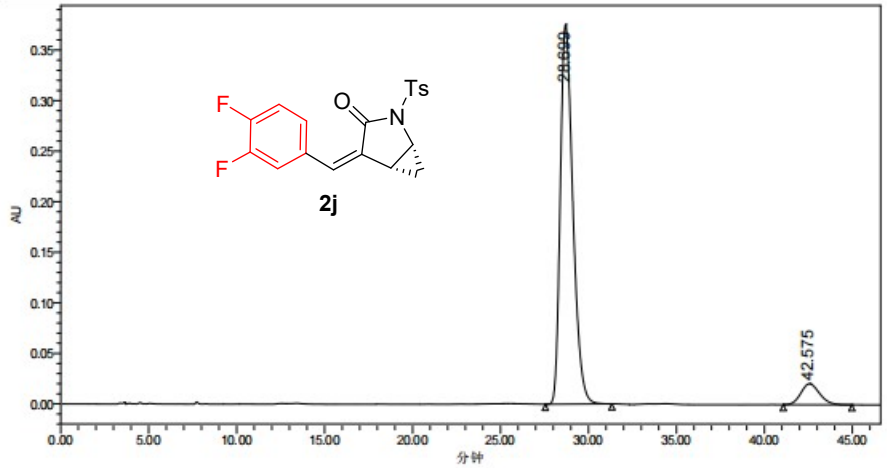

|   | RT (min) | Area (峰*sec) | % Area | Height (峰) | % Height |
|---|----------|--------------|--------|------------|----------|
| 1 | 28.699   | 18619308     | 92.37  | 375482     | 94.75    |
| 2 | 42.575   | 1537188      | 7.63   | 20791      | 5.25     |



### SAMPLE INFORMATION

|                                    |                                        |                                        |
|------------------------------------|----------------------------------------|----------------------------------------|
| Sample Name: LHZ-TS-PH-W IA 10VS90 | Acquired By: Breeze                    | Date Acquired: 2023/3/19 17:34:36 CST  |
| Sample Type: 未知                    | Date Acquired: 2023/3/19 17:34:36 CST  | Acq. Method: iPr vs Hex 10vs90         |
| Vial: 1:A,1                        | Acq. Method: iPr vs Hex 10vs90         | Date Processed: 2023/4/12 19:41:45 CST |
| Injection #: 1                     | Date Processed: 2023/4/12 19:41:45 CST | Channel Name: 318.9 纳米                 |
| Injection Volume: 5.00 ul          | Channel Name: 318.9 纳米                 | Channel Desc.: 2998 (210-400)纳米        |
| Run Time: 60.00 Minutes            | Channel Desc.: 2998 (210-400)纳米        | Sample Set Name: 1561                  |
| Column Type:                       | Sample Set Name: 1561                  |                                        |

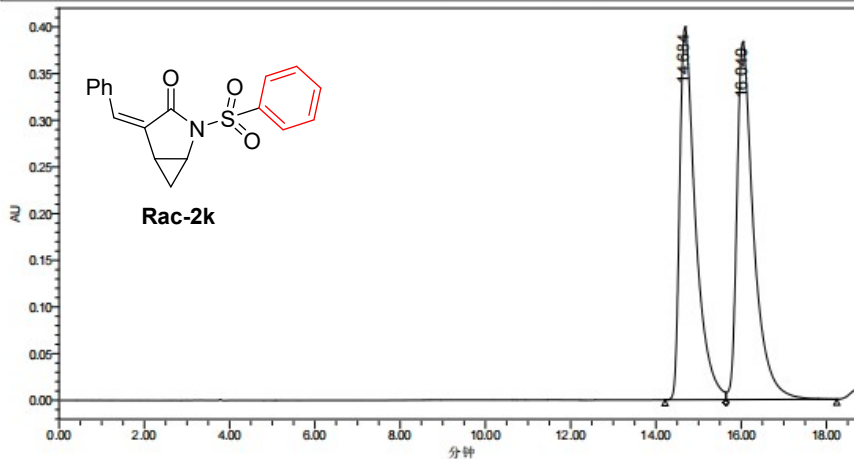

|   | RT (min) | Area (峰*sec) | % Area | Height (峰) | % Height |
|---|----------|--------------|--------|------------|----------|
| 1 | 14.684   | 10281563     | 49.44  | 399530     | 51.01    |
| 2 | 16.040   | 10516056     | 50.56  | 383650     | 48.99    |

### SAMPLE INFORMATION

|                                    |                                        |                                        |
|------------------------------------|----------------------------------------|----------------------------------------|
| Sample Name: LHZ-TS-PH-S IA 10VS90 | Acquired By: Breeze                    | Date Acquired: 2023/3/19 17:54:42 CST  |
| Sample Type: 未知                    | Date Acquired: 2023/3/19 17:54:42 CST  | Acq. Method: iPr vs Hex 10vs90         |
| Vial: 1:A,1                        | Acq. Method: iPr vs Hex 10vs90         | Date Processed: 2023/4/12 19:41:08 CST |
| Injection #: 1                     | Date Processed: 2023/4/12 19:41:08 CST | Channel Name: 318.9 纳米                 |
| Injection Volume: 5.00 ul          | Channel Name: 318.9 纳米                 | Channel Desc.: 2998 (210-400)纳米        |
| Run Time: 60.00 Minutes            | Channel Desc.: 2998 (210-400)纳米        | Sample Set Name: 15313                 |
| Column Type:                       | Sample Set Name: 15313                 |                                        |

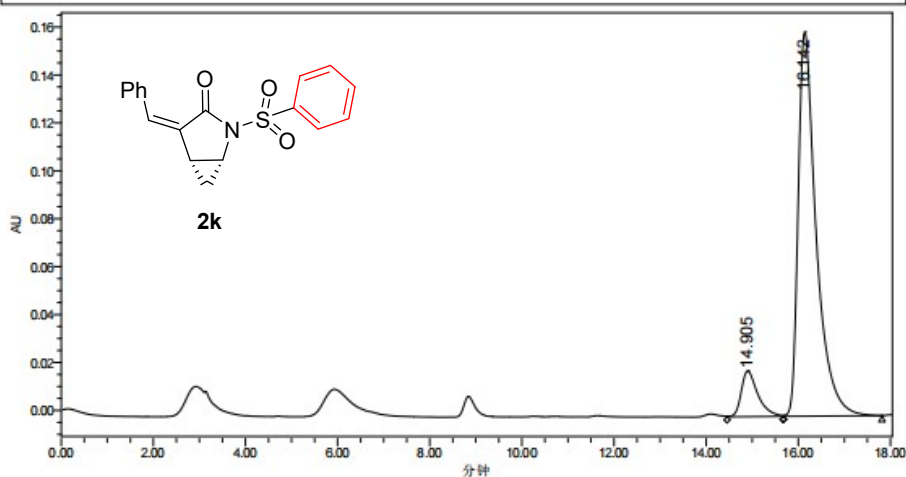

|   | RT (min) | Area (峰*sec) | % Area | Height (峰) | % Height |
|---|----------|--------------|--------|------------|----------|
| 1 | 14.905   | 476356       | 9.88   | 19119      | 10.65    |
| 2 | 16.142   | 4345035      | 90.12  | 160342     | 89.35    |

**SAMPLE INFORMATION**

|                   |                    |                 |                        |
|-------------------|--------------------|-----------------|------------------------|
| Sample Name:      | LHZ-4-F-WIC 20VS80 | Acquired By:    | Breeze                 |
| Sample Type:      | 未知                 | Date Acquired:  | 2023/3/17 15:44:37 CST |
| Vial:             | 1:A,1              | Acq. Method:    | iPr vs Hex 20vs80      |
| Injection #:      | 1                  | Date Processed: | 2023/4/12 19:50:06 CST |
| Injection Volume: | 5.00 ul            | Channel Name:   | 290.8 纳米               |
| Run Time:         | 120.00 Minutes     | Channel Desc.:  | 2998 (210-400)纳米       |
| Column Type:      |                    | Sample Set Name | 64                     |

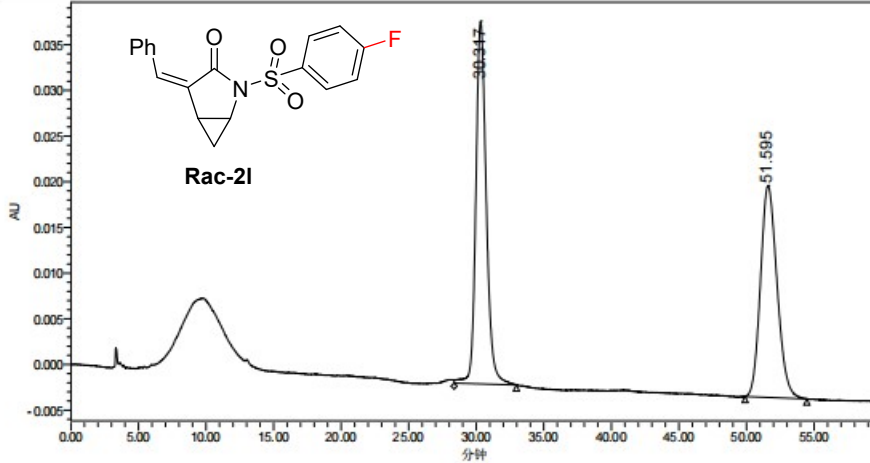

|   | RT (min) | Area (碳*sec) | % Area | Height (碳) | % Height |
|---|----------|--------------|--------|------------|----------|
| 1 | 30.317   | 2121044      | 51.83  | 39684      | 63.12    |
| 2 | 51.595   | 1971592      | 48.17  | 23191      | 36.88    |

**SAMPLE INFORMATION**

|                   |                     |                 |                        |
|-------------------|---------------------|-----------------|------------------------|
| Sample Name:      | LHZ-4-F-S IC 20VS80 | Acquired By:    | Breeze                 |
| Sample Type:      | 未知                  | Date Acquired:  | 2023/3/17 16:47:46 CST |
| Vial:             | 1:A,1               | Acq. Method:    | iPr vs Hex 20vs80      |
| Injection #:      | 1                   | Date Processed: | 2023/4/12 19:49:12 CST |
| Injection Volume: | 5.00 ul             | Channel Name:   | 290.8 纳米               |
| Run Time:         | 120.00 Minutes      | Channel Desc.:  | 2998 (210-400)纳米       |
| Column Type:      |                     | Sample Set Name | 415341                 |

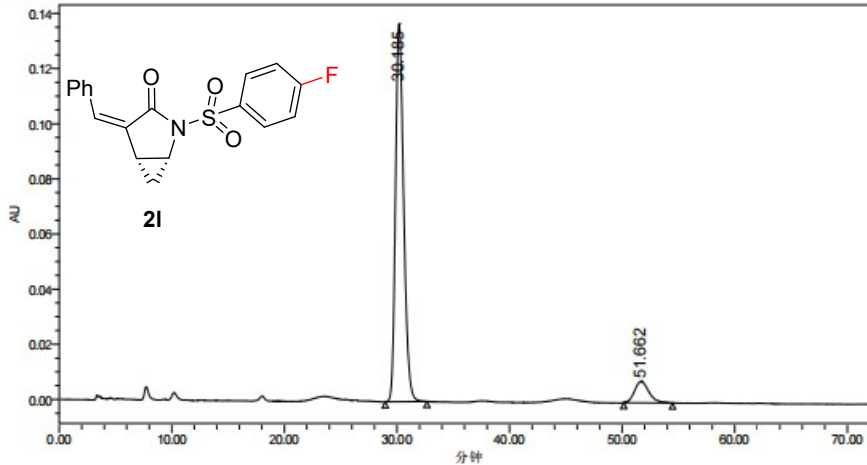

|   | RT (min) | Area (碳*sec) | % Area | Height (碳) | % Height |
|---|----------|--------------|--------|------------|----------|
| 1 | 30.185   | 6908550      | 90.98  | 137045     | 94.65    |
| 2 | 51.662   | 684696       | 9.02   | 7748       | 5.35     |

### SAMPLE INFORMATION

|                                 |                                        |
|---------------------------------|----------------------------------------|
| Sample Name: LHZ-NO2-WIC 20VS80 | Acquired By: Breeze                    |
| Sample Type: 未知                 | Date Acquired: 2023/3/18 10:05:06 CST  |
| Vial: 1:A,1                     | Acq. Method: IPr vs Hex 20vs80         |
| Injection #: 1                  | Date Processed: 2023/4/12 19:48:15 CST |
| Injection Volume: 5.00 ul       | Channel Name: 290.8 纳米                 |
| Run Time: 120.00 Minutes        | Channel Desc.: 2998 (210-400)纳米        |
| Column Type:                    | Sample Set Name: 1531                  |

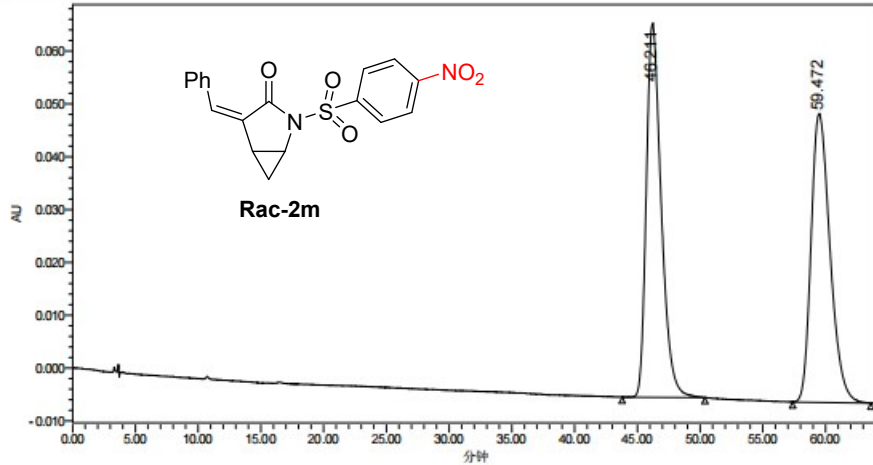

|   | RT<br>(min) | Area<br>(峰*sec) | % Area | Height<br>(峰) | % Height |
|---|-------------|-----------------|--------|---------------|----------|
| 1 | 46.211      | 5840088         | 50.43  | 70727         | 56.43    |
| 2 | 59.472      | 5740590         | 49.57  | 54599         | 43.57    |

### SAMPLE INFORMATION

|                                  |                                        |
|----------------------------------|----------------------------------------|
| Sample Name: LHZ-NO2-S IC 20VS80 | Acquired By: Breeze                    |
| Sample Type: 未知                  | Date Acquired: 2023/3/18 11:11:44 CST  |
| Vial: 1:A,2                      | Acq. Method: IPr vs Hex 20vs80         |
| Injection #: 1                   | Date Processed: 2023/4/12 19:47:29 CST |
| Injection Volume: 5.00 ul        | Channel Name: 290.8 纳米                 |
| Run Time: 120.00 Minutes         | Channel Desc.: 2998 (210-400)纳米        |
| Column Type:                     | Sample Set Name: SDFsd                 |

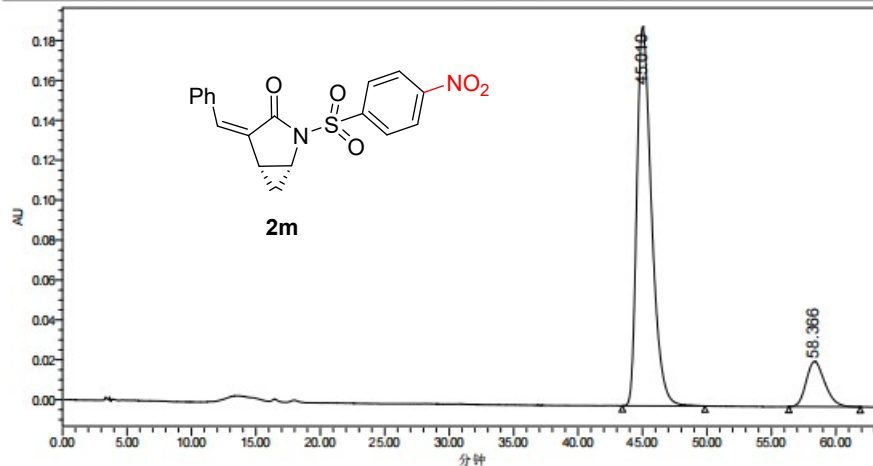

|   | RT<br>(min) | Area<br>(峰*sec) | % Area | Height<br>(峰) | % Height |
|---|-------------|-----------------|--------|---------------|----------|
| 1 | 45.010      | 15038486        | 86.85  | 189907        | 89.33    |
| 2 | 58.366      | 2277658         | 13.15  | 22677         | 10.67    |

### SAMPLE INFORMATION

|                                        |                                        |                                       |
|----------------------------------------|----------------------------------------|---------------------------------------|
| Sample Name: LHZ-2022-0923-1 IA 10VS90 | Acquired By: Breeze                    | Date Acquired: 2022/9/23 20:14:19 CST |
| Sample Type: 未知                        | Date Acquired: 2022/9/23 20:14:19 CST  | Acq. Method: iPr vs Hex 10vs90        |
| Vial: 1:A,1                            | Date Processed: 2023/4/12 20:37:11 CST | Channel Name: 318.9 纳米                |
| Injection #: 1                         | Channel Desc.: 2998 (210-400)纳米        | Sample Set Name: 4861                 |
| Injection Volume: 5.00 ul              |                                        |                                       |
| Run Time: 40.00 Minutes                |                                        |                                       |
| Column Type:                           |                                        |                                       |

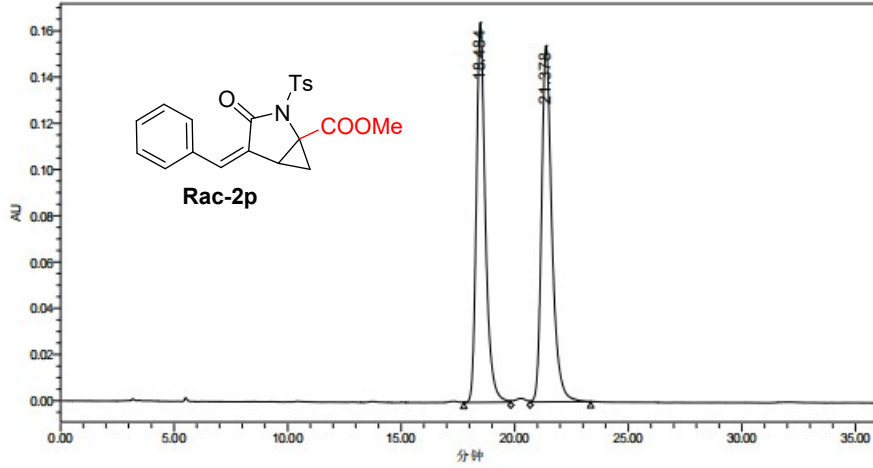

|   | RT (min) | Area (峰*sec) | % Area | Height (峰) | % Height |
|---|----------|--------------|--------|------------|----------|
| 1 | 18.484   | 4563033      | 48.34  | 164210     | 51.59    |
| 2 | 21.378   | 4877220      | 51.66  | 154067     | 48.41    |

### SAMPLE INFORMATION

|                                        |                                        |                                       |
|----------------------------------------|----------------------------------------|---------------------------------------|
| Sample Name: LHZ-2022-0923-3 IA 10VS90 | Acquired By: Breeze                    | Date Acquired: 2022/9/23 10:35:28 CST |
| Sample Type: 未知                        | Date Acquired: 2022/9/23 10:35:28 CST  | Acq. Method: iPr vs Hex 10vs90        |
| Vial: 1:A,2                            | Date Processed: 2023/4/12 20:35:42 CST | Channel Name: 318.9 纳米                |
| Injection #: 1                         | Channel Desc.: 2998 (210-400)纳米        | Sample Set Name: SDF                  |
| Injection Volume: 5.00 ul              |                                        |                                       |
| Run Time: 40.00 Minutes                |                                        |                                       |
| Column Type:                           |                                        |                                       |

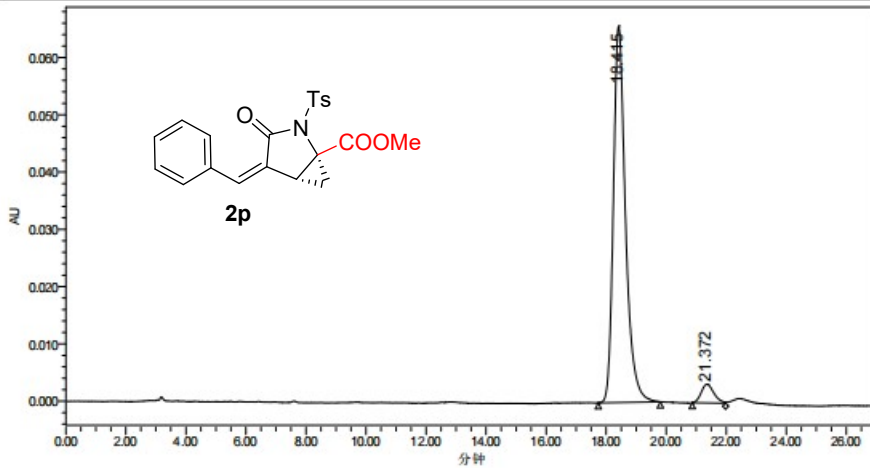

|   | RT (min) | Area (峰*sec) | % Area | Height (峰) | % Height |
|---|----------|--------------|--------|------------|----------|
| 1 | 18.415   | 1840327      | 95.08  | 65720      | 95.28    |
| 2 | 21.372   | 95128        | 4.92   | 3256       | 4.72     |

**SAMPLE INFORMATION**

|                   |                           |                  |                        |
|-------------------|---------------------------|------------------|------------------------|
| Sample Name:      | LHZ-4-Me-COOME- WIA 2VS98 | Acquired By:     | Breeze                 |
| Sample Type:      | 未知                        | Date Acquired:   | 2023/5/25 14:50:49 CST |
| Vial:             | 1:A,1                     | Acq. Method:     | iPr vs Hex 2vs98       |
| Injection #:      | 1                         | Date Processed:  | 2023/5/30 10:39:07 CST |
| Injection Volume: | 5.00 ul                   | Channel Name:    | 303.1 纳米               |
| Run Time:         | 100.00 Minutes            | Channel Desc.:   | 2998 (210-400)纳米       |
| Column Type:      |                           | Sample Set Name: | 262                    |

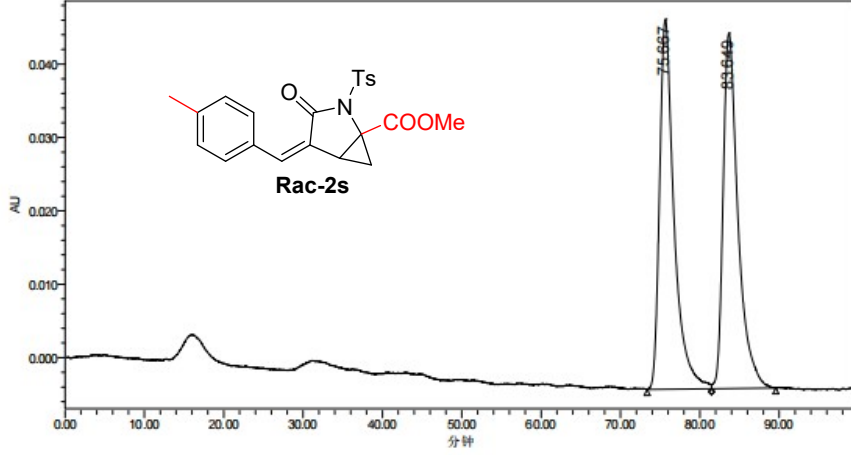

|   | RT (min) | Area (峰*sec) | % Area | Height (峰) | % Height |
|---|----------|--------------|--------|------------|----------|
| 1 | 75.667   | 6402062      | 50.29  | 50426      | 51.01    |
| 2 | 83.649   | 6327508      | 49.71  | 48425      | 48.99    |

**SAMPLE INFORMATION**

|                   |                   |                  |                        |
|-------------------|-------------------|------------------|------------------------|
| Sample Name:      | LHZ-ME-S IA 2VS98 | Acquired By:     | Breeze                 |
| Sample Type:      | 未知                | Date Acquired:   | 2023/5/26 10:31:19 CST |
| Vial:             | 1:A,2             | Acq. Method:     | iPr vs Hex 2vs98       |
| Injection #:      | 1                 | Date Processed:  | 2023/5/30 10:42:55 CST |
| Injection Volume: | 5.00 ul           | Channel Name:    | 303.1 纳米               |
| Run Time:         | 100.00 Minutes    | Channel Desc.:   | 2998 (210-400)纳米       |
| Column Type:      |                   | Sample Set Name: | 156                    |

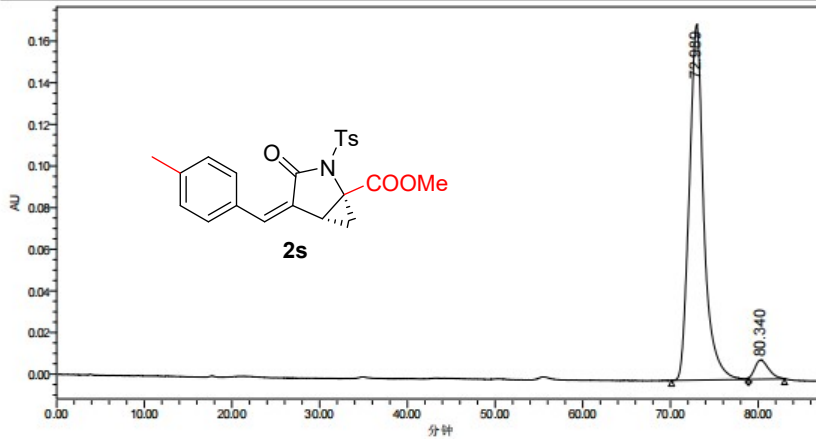

|   | RT (min) | Area (峰*sec) | % Area | Height (峰) | % Height |
|---|----------|--------------|--------|------------|----------|
| 1 | 72.989   | 19721603     | 95.07  | 170784     | 94.88    |
| 2 | 80.340   | 1022050      | 4.93   | 9210       | 5.12     |

### SAMPLE INFORMATION

|                           |                                        |                                        |
|---------------------------|----------------------------------------|----------------------------------------|
| Sample Name: LHZ-         | Acquired By: Breeze                    | Date Acquired: 2023/5/26 18:31:24 CST  |
| Sample Type: 未知           | Date Acquired: 2023/5/26 18:31:24 CST  | Acq. Method: iPr vs Hex 10vs90         |
| Vial: 1:A,1               | Acq. Method: iPr vs Hex 10vs90         | Date Processed: 2023/5/30 10:43:46 CST |
| Injection #: 1            | Date Processed: 2023/5/30 10:43:46 CST | Channel Name: 318.9 纳米                 |
| Injection Volume: 5.00 ul | Channel Name: 318.9 纳米                 | Channel Desc.: 2998 (210-400)纳米        |
| Run Time: 100.00 Minutes  | Channel Desc.: 2998 (210-400)纳米        | Sample Set Name: 2                     |
| Column Type:              | Sample Set Name: 2                     |                                        |

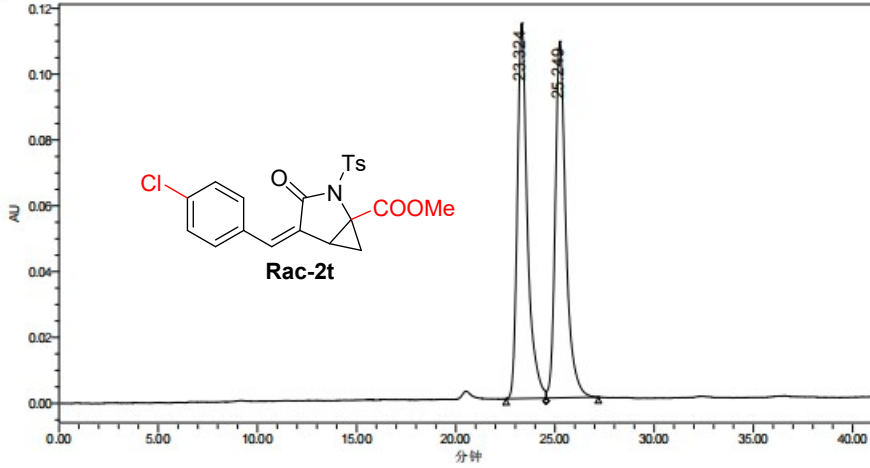

|   | RT (min) | Area (峰*sec) | % Area | Height (峰) | % Height |
|---|----------|--------------|--------|------------|----------|
| 1 | 23.324   | 4037310      | 50.09  | 113978     | 51.28    |
| 2 | 25.249   | 4023314      | 49.91  | 108276     | 48.72    |

### SAMPLE INFORMATION

|                                 |                                        |                                        |
|---------------------------------|----------------------------------------|----------------------------------------|
| Sample Name: LHZ-CL-S IA 10VS90 | Acquired By: Breeze                    | Date Acquired: 2023/5/26 19:13:42 CST  |
| Sample Type: 未知                 | Date Acquired: 2023/5/26 19:13:42 CST  | Acq. Method: iPr vs Hex 10vs90         |
| Vial: 1:A,1                     | Acq. Method: iPr vs Hex 10vs90         | Date Processed: 2023/5/30 10:44:58 CST |
| Injection #: 1                  | Date Processed: 2023/5/30 10:44:58 CST | Channel Name: 318.9 纳米                 |
| Injection Volume: 5.00 ul       | Channel Name: 318.9 纳米                 | Channel Desc.: 2998 (210-400)纳米        |
| Run Time: 100.00 Minutes        | Channel Desc.: 2998 (210-400)纳米        | Sample Set Name: ASDF                  |
| Column Type:                    | Sample Set Name: ASDF                  |                                        |

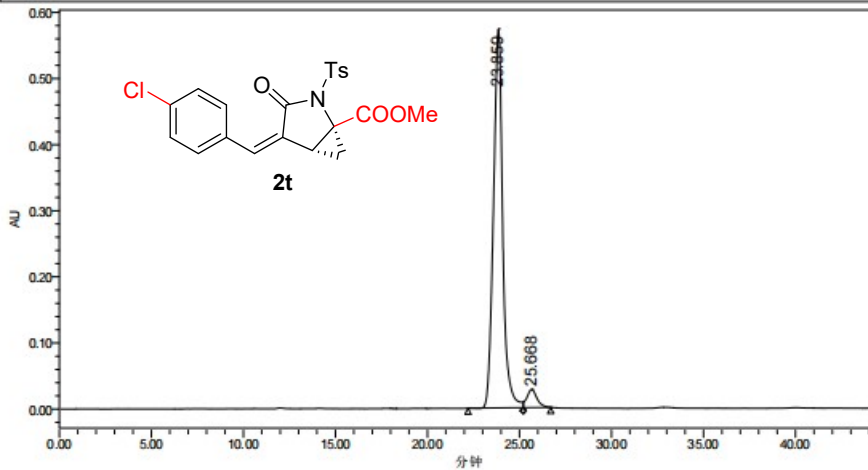

|   | RT (min) | Area (峰*sec) | % Area | Height (峰) | % Height |
|---|----------|--------------|--------|------------|----------|
| 1 | 23.859   | 20059008     | 95.05  | 573190     | 95.42    |
| 2 | 25.668   | 1044286      | 4.95   | 27500      | 4.58     |

### SAMPLE INFORMATION

|                                |                                        |
|--------------------------------|----------------------------------------|
| Sample Name: LHZ-F-W ID 10VS90 | Acquired By: Breeze                    |
| Sample Type: 未知                | Date Acquired: 2023/5/28 17:23:22 CST  |
| Vial: 1:A,1                    | Acq. Method: iPr vs Hex 10vs90         |
| Injection #: 1                 | Date Processed: 2023/5/30 10:45:18 CST |
| Injection Volume: 5.00 ul      | Channel Name: 318.9 纳米                 |
| Run Time: 100.00 Minutes       | Channel Desc.: 2998 (210-400)纳米        |
| Column Type:                   | Sample Set Name 15                     |

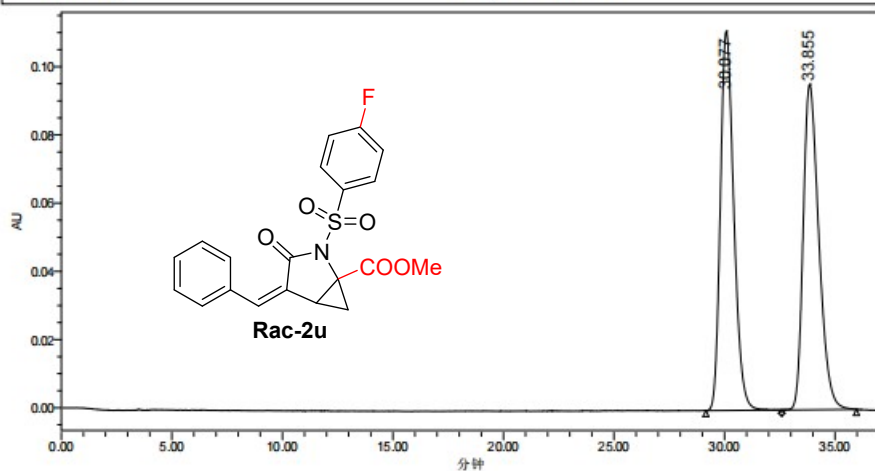

|   | RT<br>(min) | Area<br>(峰*sec) | % Area | Height<br>(峰) | % Height |
|---|-------------|-----------------|--------|---------------|----------|
| 1 | 30.077      | 4694086         | 49.96  | 111163        | 53.82    |
| 2 | 33.855      | 4701362         | 50.04  | 95397         | 46.18    |

### SAMPLE INFORMATION

|                                |                                        |
|--------------------------------|----------------------------------------|
| Sample Name: LHZ-F-S ID 10VS90 | Acquired By: Breeze                    |
| Sample Type: 未知                | Date Acquired: 2023/5/28 18:01:26 CST  |
| Vial: 1:A,2                    | Acq. Method: iPr vs Hex 10vs90         |
| Injection #: 1                 | Date Processed: 2023/5/30 10:46:15 CST |
| Injection Volume: 5.00 ul      | Channel Name: 318.9 纳米                 |
| Run Time: 100.00 Minutes       | Channel Desc.: 2998 (210-400)纳米        |
| Column Type:                   | Sample Set Name ZXCVB                  |

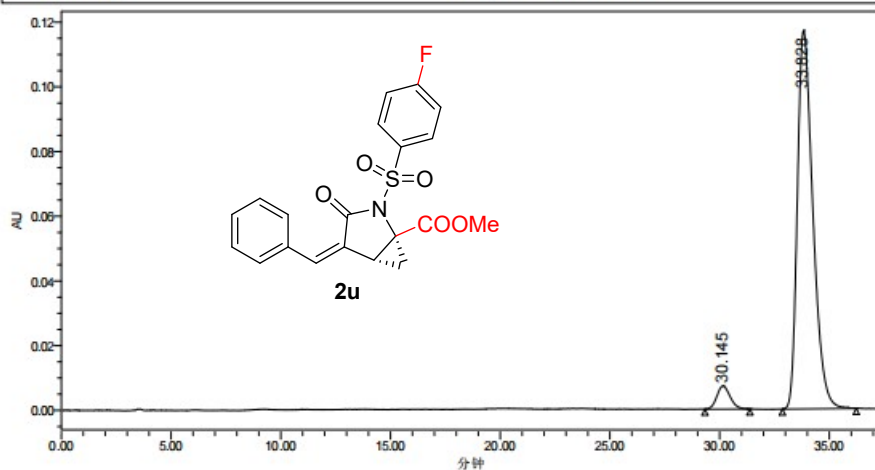

|   | RT<br>(min) | Area<br>(峰*sec) | % Area | Height<br>(峰) | % Height |
|---|-------------|-----------------|--------|---------------|----------|
| 1 | 30.145      | 301493          | 4.99   | 7164          | 5.77     |
| 2 | 33.828      | 5743212         | 95.01  | 116973        | 94.23    |
